# Supplementary material for: (Phosphanyl)phosphaketenes as building blocks for novel phosphorus heterocycles
Source: PubMed Central journal article supplement (PMC5437511; doi:10.1039/c7sc00300e), 2017-03-08
Supplement: SC-008-C7SC00300E-s001.pdf [file SC-008-C7SC00300E-s001.pdf]

## *Supplementary Information*

for

### **(Phosphanyl)phosphaketenes as Building Blocks for Novel Phosphorus Heterocycles**

Max M. Hansmann, David A. Ruiz, Liu (Leo) Liu, Rodolphe Jazzar and Guy Bertrand\*

#### **Table of Contents**

|                                                     |    |
|-----------------------------------------------------|----|
| <b>1. General Information</b> .....                 | 1  |
| <b>2. Synthesis and Characterization data</b> ..... | 2  |
| <b>3. X-ray data</b> .....                          | 15 |
| <b>4. Computational part</b> .....                  | 29 |
| <b>5. References</b> .....                          | 64 |

#### ***1. General Information***

All manipulations were performed under an atmosphere of dry argon using standard Schlenk or dry box techniques. Solvents were dried by standard methods and distilled under argon.  $^1\text{H}$ ,  $^{31}\text{P}$ ,  $^{19}\text{F}$  and  $^{13}\text{C}$  NMR spectra were recorded on a Varian VX 500, Bruker 300 and Jeol 500 spectrometer at 25°C. NMR multiplicities are abbreviated as follows: *s* = singlet, *d* = doublet, *t* = triplet, *sept* = septet, *m* = multiplet, *br* = broad signal. Chemical shifts are given in ppm and coupling constants *J* are given in Hz. Single crystal X-ray diffraction data were collected on a Bruker Apex II-CCD detector using Mo-K $\alpha$  radiation ( $\lambda = 0.71073 \text{ \AA}$ ) or Cu-K $\alpha$  radiation ( $\lambda = 1.54178 \text{ \AA}$ ) at the UC San Diego Crystallography Facility. Mass spectra were performed at the UC San Diego Mass Spectrometry Laboratory. Melting points were measured with an electrothermal MEL-TEMP apparatus. **1**<sup>Dipp</sup> and **1**<sup>Ar\*\*</sup> were synthesized according to literature procedures.<sup>1</sup>

## 2. Synthesis and Characterization data

### Preparation of 4:

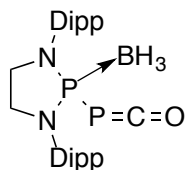

A mixture of **1**<sup>Dipp</sup> (30 mg, 0.064 mmol) and excess BH<sub>3</sub>-SMe<sub>2</sub> was dissolved in pentane (2 mL). The solution stirred for 30 minutes and the resulting white powder was separated by filtration and washed with 2 × 2 mL of pentane. **4** was isolated as a white solid (22 mg, yield: 72 %). Single crystals were grown from a concentrated pentane solution. M.p.: 130 °C (dec.). <sup>31</sup>P{<sup>1</sup>H} NMR (pentane, 300 MHz): δ = 131.2 (br d, J<sub>PP</sub> = 295 Hz), -226.1 (J<sub>PP</sub> = 295 Hz). In solution the mixture bubbled continuously leading to decomposition, making meaningful interpretation of the <sup>13</sup>C and <sup>1</sup>H NMR spectra impossible. Numerous attempts towards recrystallization resulted in crystals of poor quality. However, a structure was successfully solved confirming the coordination of the borane onto the cyclic P atom.

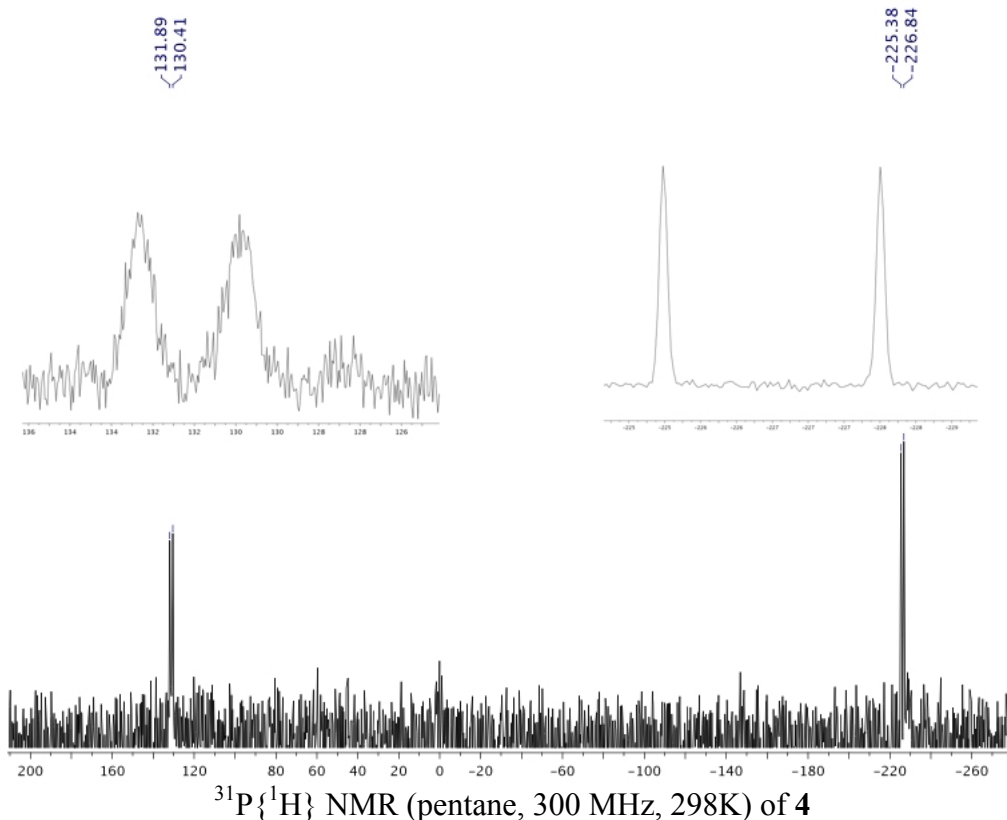

## Preparation of 5:

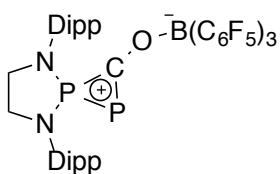

A mixture of **1**<sup>Dipp</sup> (30 mg, 0.064 mmol) and B(C<sub>6</sub>F<sub>5</sub>)<sub>3</sub> (33 mg, 0.064 mmol) was dissolved in pentane (1 mL). The solution stirred for 30 minutes and resulted in a white powder, which was separated from the solution and washed with 2 × 2 mL of pentane. **5** was isolated as a white solid (50 mg, yield: 80 %). Single crystals were grown from a concentrated pentane solution. M.p.: 152 °C (dec.). <sup>1</sup>H NMR (C<sub>6</sub>D<sub>6</sub>, 500 MHz, 298K): δ [ppm] = 7.21 (t, *J* = 7.5 Hz, 2H), 7.09 (d, *J* = 7.5 Hz, 1H), 7.00 (d, *J* = 7.5 Hz, 1H), 6.95 (d, *J* = 7.5 Hz, 2H), 3.48 (m, 2H), 3.23 (m, 2H), 3.13 (sept, *J* = 6.5 Hz, 2H), 3.08 (sept, *J* = 6.5 Hz, 2H), 1.33 (d, *J* = 6.5 Hz, 3H), 1.24 (dd, 9H), 1.03 (m, 12H); <sup>13</sup>C NMR (C<sub>6</sub>D<sub>6</sub>, 125 MHz, 298K): δ [ppm] = 195.1 (d, *J*<sub>PC</sub> = 97.8 Hz), 149.3, 148.4 (br d, *J*<sub>CF</sub> = 245 Hz), 147.9, 140.6 (br d, *J*<sub>CF</sub> = 250 Hz), 137.5 (br d, *J*<sub>CF</sub> = 248 Hz), 130.6, 125.5, 125.0, 124.7, 55.8 (d, *J*<sub>PC</sub> = 8.7 Hz), 49.0 (d, *J*<sub>PC</sub> = 12.0 Hz), 29.5 (d, *J*<sub>PC</sub> = 9.9 Hz), 26.0, 25.8, 25.4, 24.8, 23.9, 22.4; <sup>31</sup>P{<sup>1</sup>H} NMR (C<sub>6</sub>D<sub>6</sub>, 121 MHz, 298K) δ [ppm] = 205.8 (d, *J*<sub>PP</sub> = 215.4 Hz, PPCO), -10.6 (d, *J*<sub>PP</sub> = 215.4 Hz, PPCO); <sup>19</sup>F NMR (C<sub>6</sub>D<sub>6</sub>, 283 MHz, 298K) δ [ppm] = -132.1 (br), -157.4 (t, *J*<sub>FF</sub> = 22.0 Hz), -163.8 (t, *J*<sub>FF</sub> = 22.0 Hz). HR-MS: *m/z* calculated for [C<sub>45</sub>H<sub>39</sub>B F<sub>15</sub>N<sub>2</sub>O<sub>2</sub>P<sub>2</sub>]<sup>-</sup> (M-H)<sup>-</sup> 996.2382; found 996.2378.

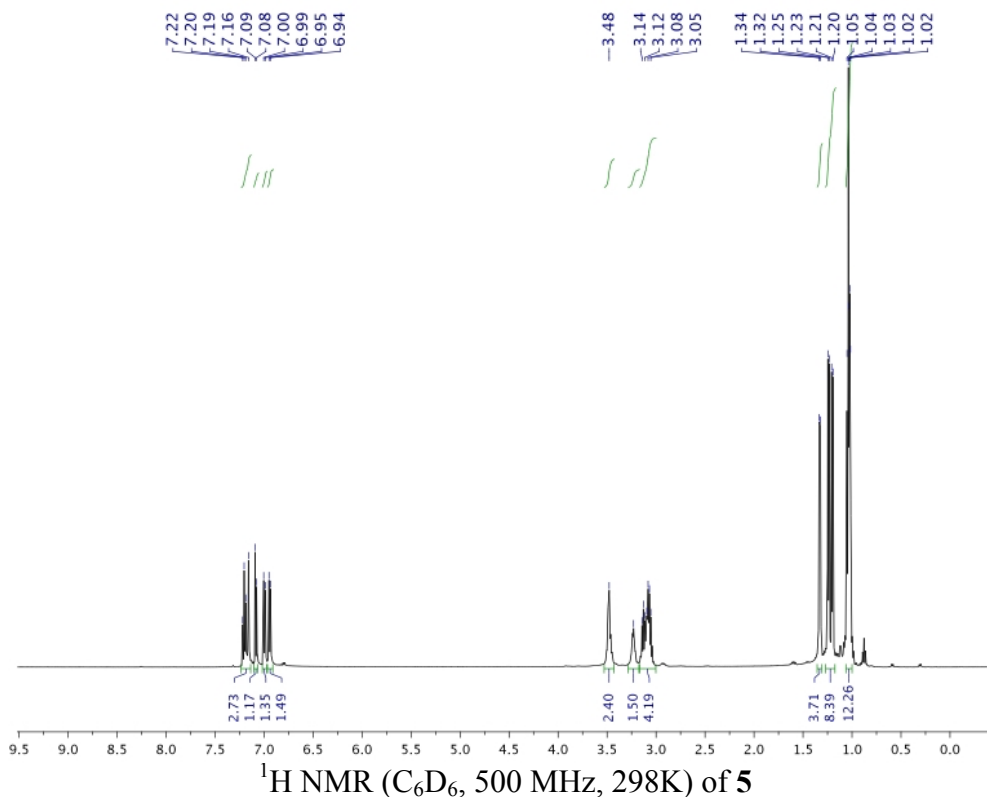

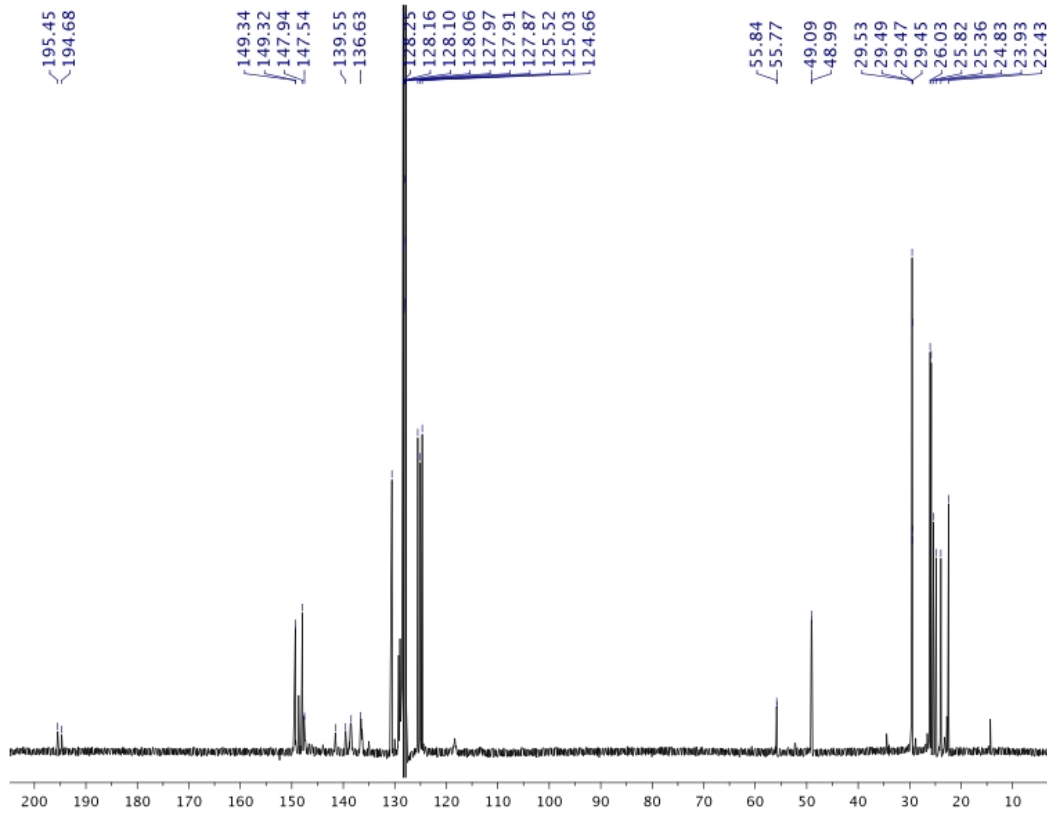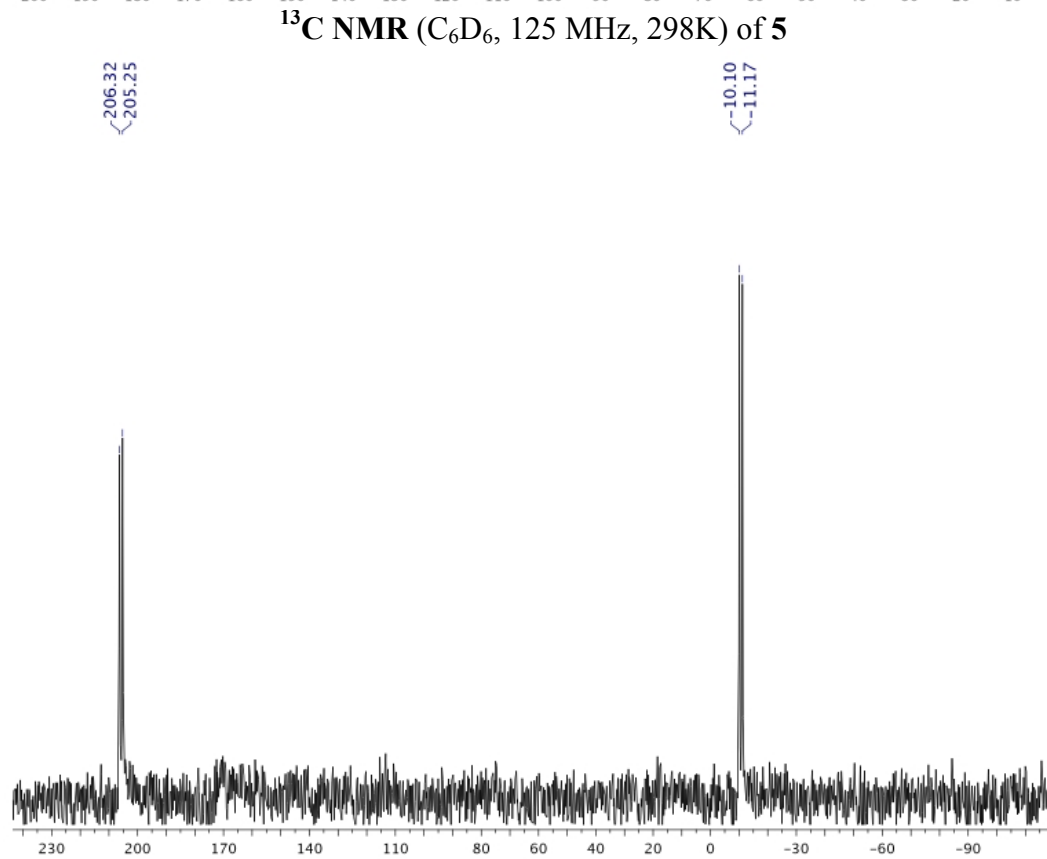

## Preparation of 6:

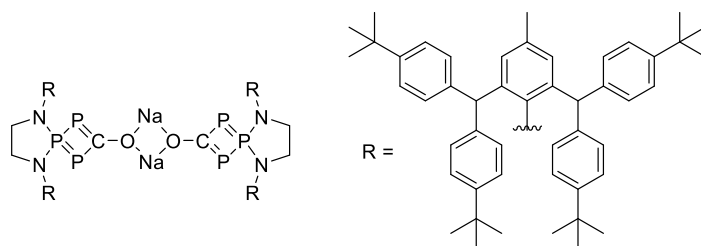

**1<sup>Ar\*\*</sup>** (80 mg, 0.06 mmol) and NaPCO(dioxane)<sub>3.0</sub> (60 mg, 0.17 mmol, 3.0 eq) were dissolved in THF (1 mL). The solution was stirred for 15 min, the solvent removed under reduced pressure and the remaining solid dissolved in toluene (2 mL). The suspension was filtered and the solvent removed under reduced pressure to give **6** as slightly yellow solid (62 mg, 73%). Even though this transformation is very selective, bulk samples of **6** could not be obtained free from impurities (hydrolysis of starting material).

**<sup>1</sup>H NMR** (C<sub>6</sub>D<sub>6</sub>, 300 MHz, 298K): δ [ppm] = 7.74 (d, *J* = 8.3 Hz, 8H), 7.35-7.29 (m, 8H), 7.19-7.09 (m, 12H), 7.02 (d, *J* = 8.3 Hz, 8H), 3.64 (brs, coord. THF), 3.42 (s, 4H), 2.37-2.26 (m, 4H), 1.90 (s, 6H), 1.44 (brs, coord. THF), 1.24 (s, 36H), 1.19 (s, 36H); **<sup>13</sup>C NMR** (C<sub>6</sub>D<sub>6</sub>, 125 MHz, 298K): δ [ppm] = 250.2 (m, P<sub>3</sub>C-ring), 148.6, 148.5, 146.9, 144.2, 142.6, 138.9, 125.3, 131.0, 130.9, 129.8, 125.2, 125.0, 68.1, 67.3, 51.2, 49.2, 34.5, 34.4, 31.7, 31.7, 25.8; **<sup>31</sup>P NMR** (C<sub>6</sub>D<sub>6</sub>, 121 MHz, 298K): δ [ppm] = + 126.1 (d, *J* = 302 Hz), + 69.6 (*J* = 298 Hz, 310 Hz). **HR-MS**: *m/z* calculated for [C<sub>101</sub> H<sub>122</sub> B N<sub>2</sub> O P<sub>3</sub>]<sup>-</sup> [Monomer; M-Na]<sup>-</sup> 1471.8770; found 1471.8755.

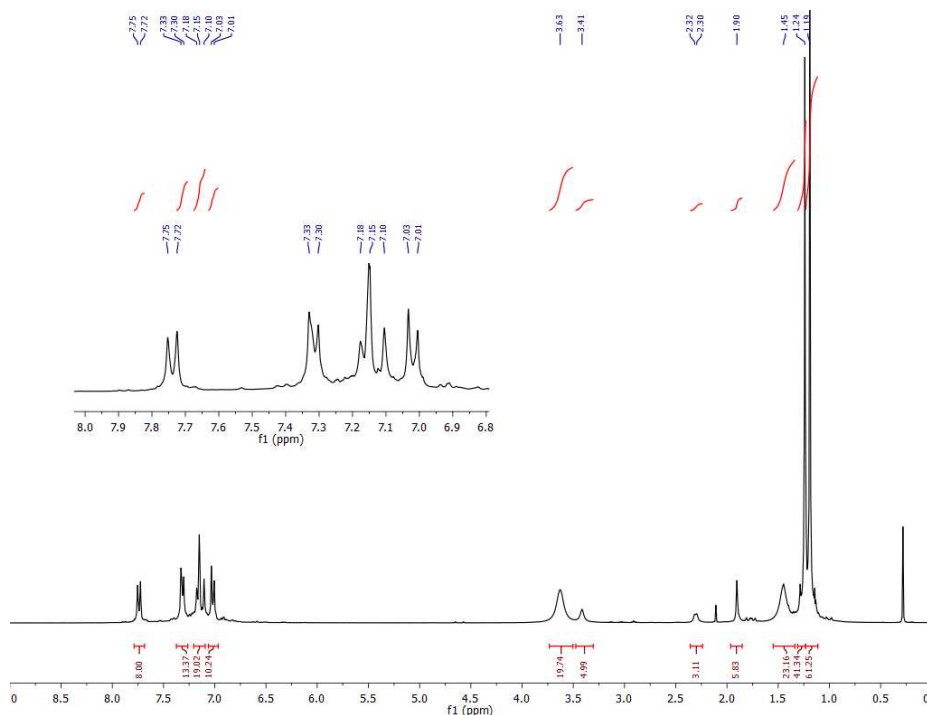

<sup>1</sup>H NMR (C<sub>6</sub>D<sub>6</sub>, 300 MHz, 298K) of **6**

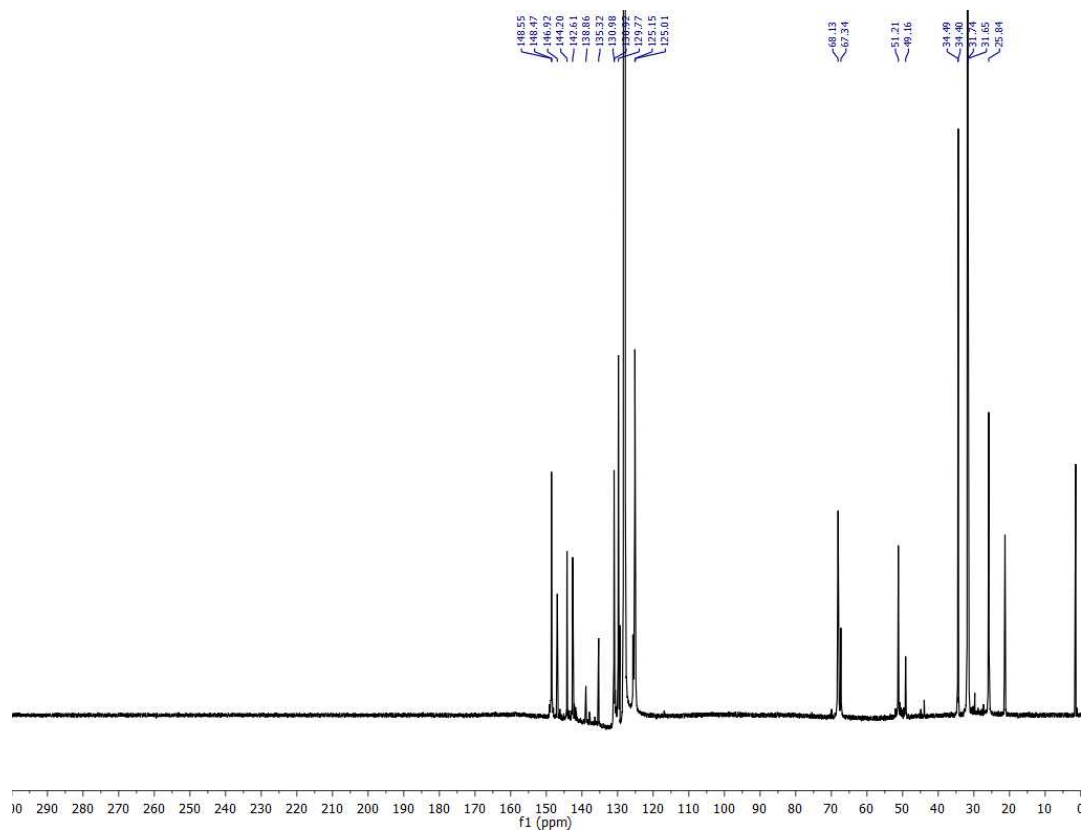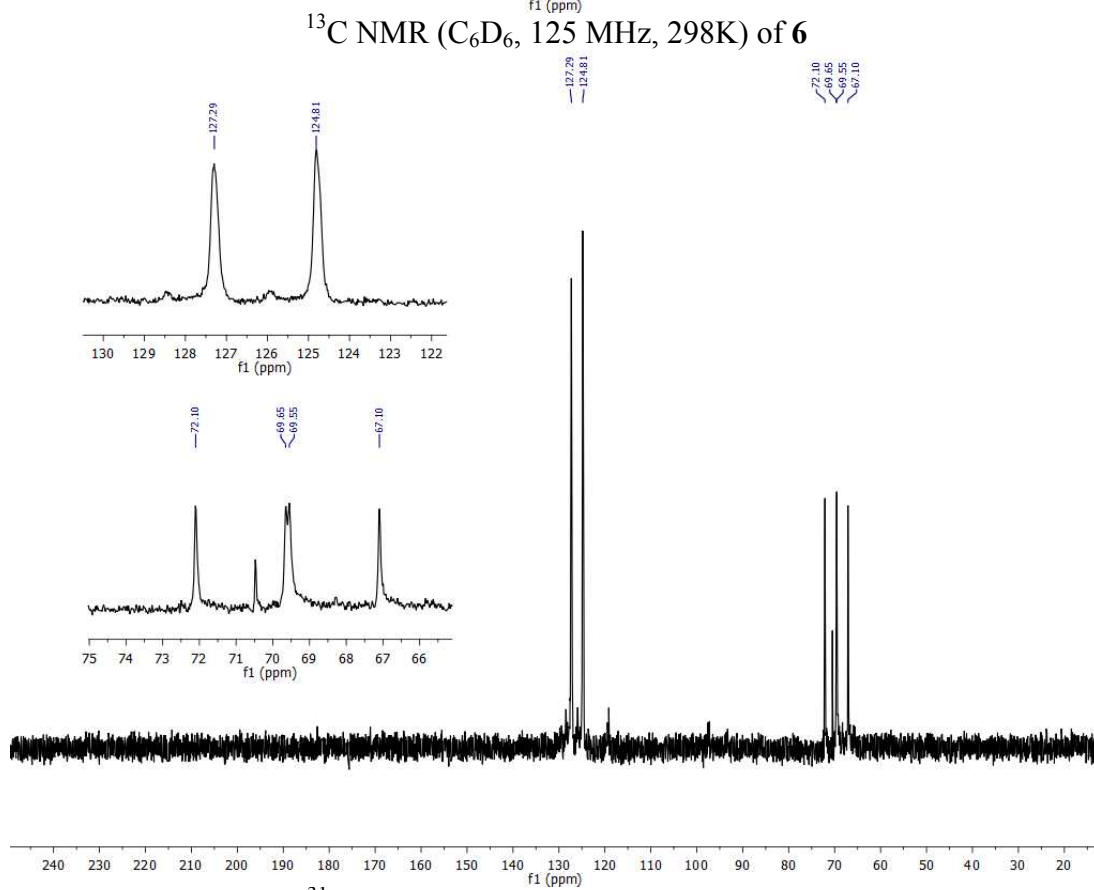

### Preparation of 7:

To a solution of **6** (60 mg, 0.040 mmol) in benzene (1 mL) was added excess 15-crown-5-ether (0.1 mL). Upon standing single crystals of **7** formed. The solution was decanted off the solid washed with little pentane and the remaining solvent evaporated to give **7** as slightly yellow solid (40 mg, 58%).  $^{31}\text{P}\{^1\text{H}\}$  NMR ( $\text{C}_6\text{D}_6$ , 121 MHz, 298K)  $\delta$  [ppm] = +119.7 (d,  $J = 310$  Hz), + 78.8 (t,  $J = 310$  Hz).

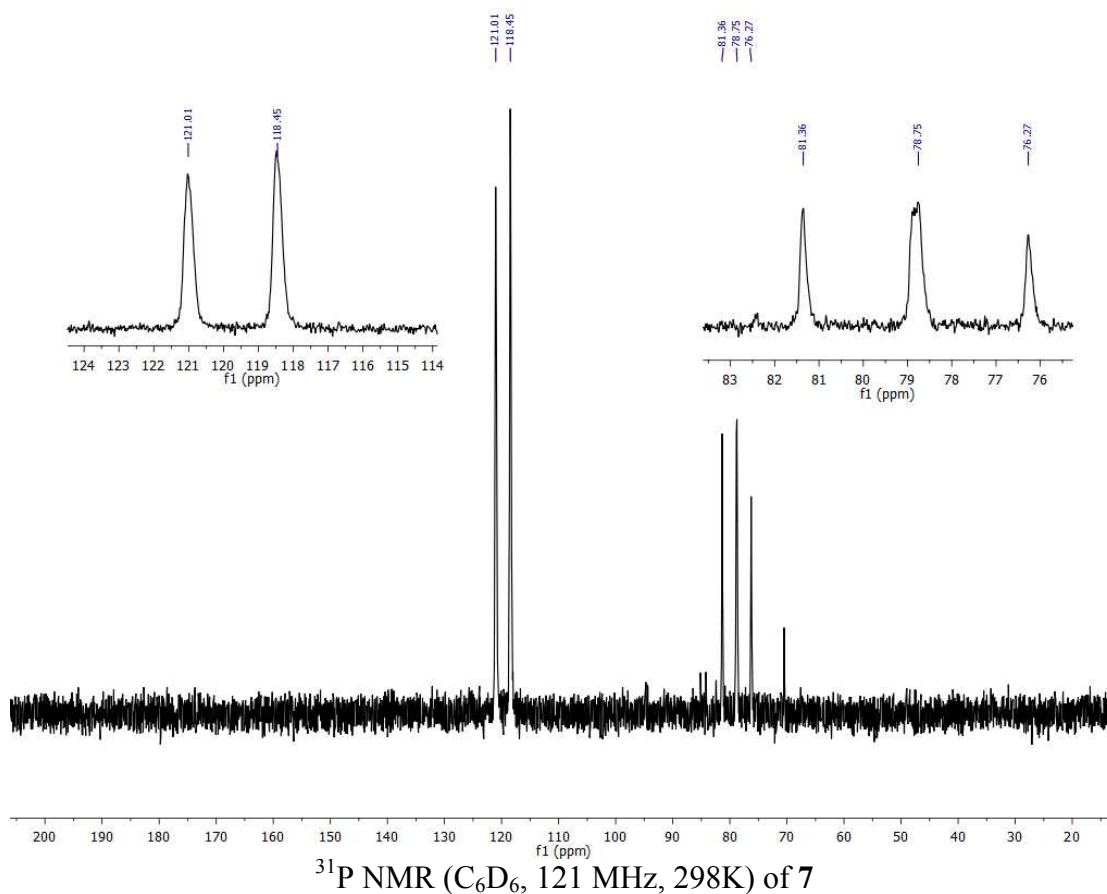

### Labeling experiment:

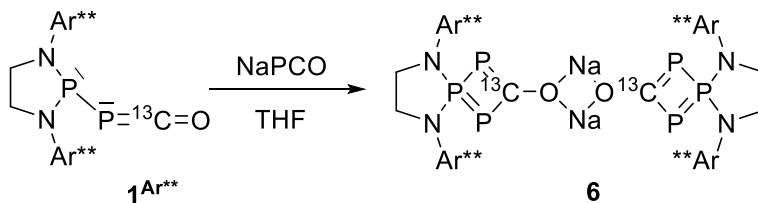

To a solution of  $^{13}\text{C}$  labelled  $\text{1Ar}^{**}$ , **1** (50 mg, 0.035 mmol) in a  $\text{C}_6\text{D}_6$ (0.5 mL)/THF(0.2 mL) mixture was added  $\text{NaPCO}(\text{dioxane})_{3.0}$  (36 mg, 0.10 mmol, 3eq.). The  $^{13}\text{C}$  NMR and  $^{31}\text{P}$  NMR was directly measured (see below). While the  $^{13}\text{C}$  NMR of the non-labelled experiment did not allow the identification of the carbon resonance of the phosphorus cycle, the  $^{13}\text{C}$  NMR of the labelled one did (see below).

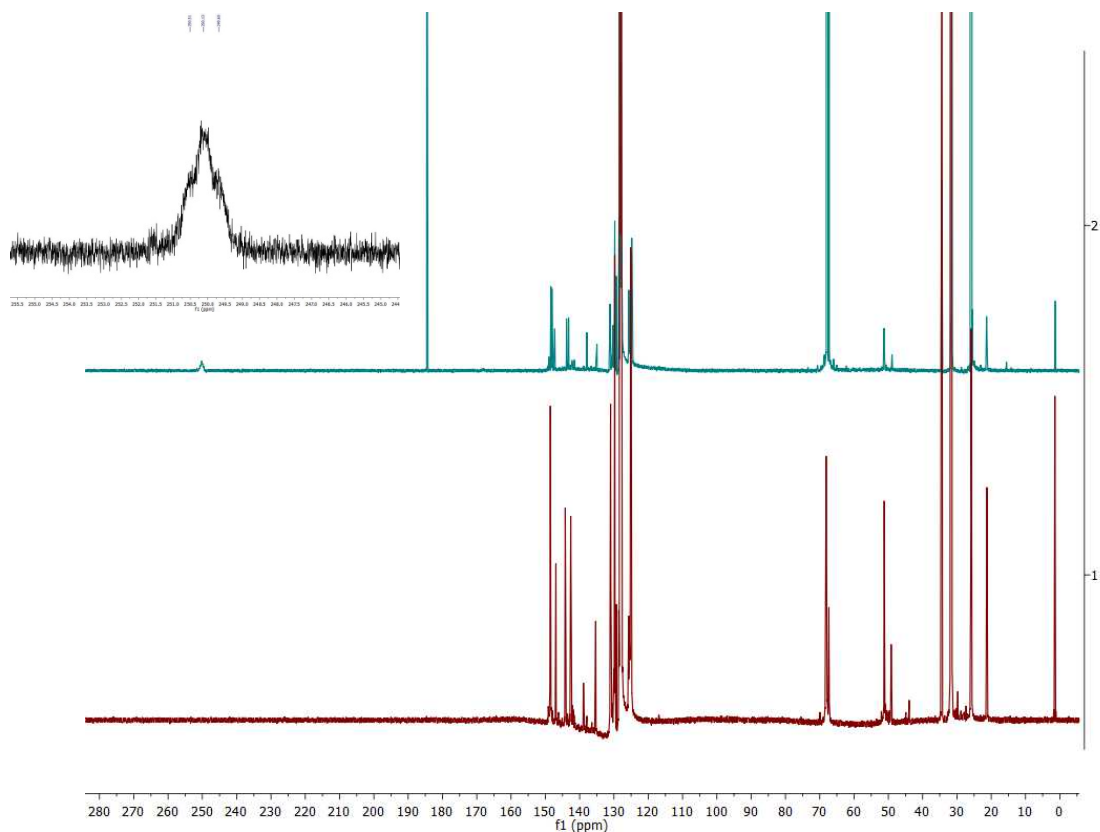

$^{13}\text{C}$  NMR ( $\text{C}_6\text{D}_6$ , 125 MHz, 298K) overlay of **6**  $^{13}\text{C}$ -labelled (top) and unlabeled (below).

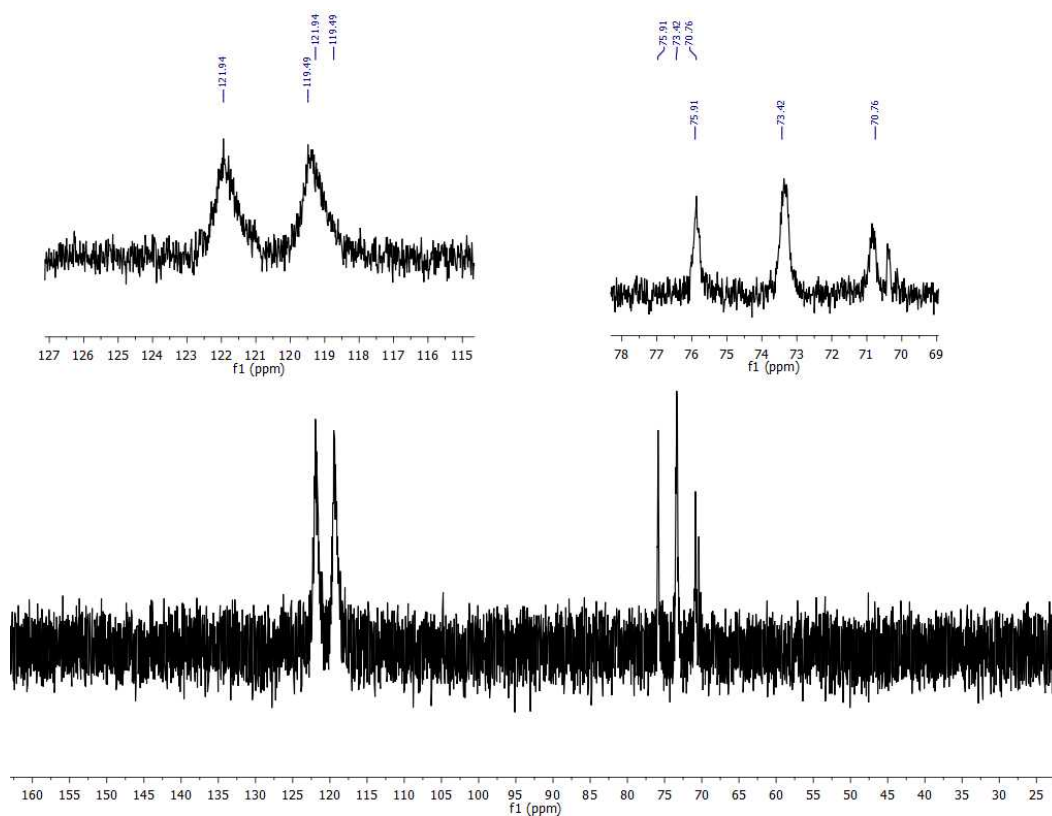

$^{31}\text{P}$  NMR ( $\text{C}_6\text{D}_6/\text{THF}$ , 121 MHz, 298K) of labelled **6**.



## Preparation of 8:

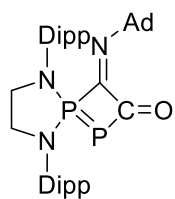

**1<sup>Dipp</sup>** (10 mg, 0.021 mmol) and 1-adamantyl isocyanide (4 mg, 0.025 mmol) were dissolved in pentane (0.5 mL). The mixture was left overnight, upon which yellow crystals formed. The solution was decanted yielding 11 mg of **8** (85% yield).

M.p.: 165 °C (dec.). **<sup>1</sup>H NMR** (C<sub>6</sub>D<sub>6</sub>, 500 MHz, 298K): δ [ppm] = 7.14 (br, 2H), 7.07 (br m, 4H), 3.92 (sept, *J* = 6.8 Hz, 2H), 3.60 (m, 2H), 3.45 (sept, *J* = 6.8 Hz, 2H), 3.25 (m, 2H), 2.34 (br, 6H), 2.02 (br, 3H), 1.75 (d, *J* = 12.0 Hz, 3H), 1.56 (d, *J* = 12.0 Hz, 3H), 1.37 (d, *J* = 6.8 Hz, 6H), 1.35 (d, *J* = 6.8 Hz, 6H), 1.20 (d, *J* = 6.8 Hz, 6H), 1.17 (d, *J* = 6.8 Hz, 6H); **<sup>13</sup>C NMR** (C<sub>6</sub>D<sub>6</sub>, 125 MHz, 298K): δ [ppm] = 210.8 (dd, *J*<sub>PC</sub> = 90.0 Hz, *J*<sub>PC</sub> = 65.9 Hz), 180.8 (dd, *J*<sub>PC</sub> = 86.3 Hz, *J*<sub>PC</sub> = 2.7 Hz), 150.2, 149.0, 134.4, 134.3, 129.3, 124.9, 61.3, 61.2, 51.9, 51.8, 43.2, 36.6, 30.5, 29.6, 27.9, 26.6, 26.5, 25.2, 24.0, 23.9; **<sup>31</sup>P NMR** (C<sub>6</sub>D<sub>6</sub>, 121 MHz, 298K): δ [ppm] = 148.0 (d, *J*<sub>PP</sub> = 369.5 Hz), 88.3 (d, *J*<sub>PP</sub> = 369.5 Hz).

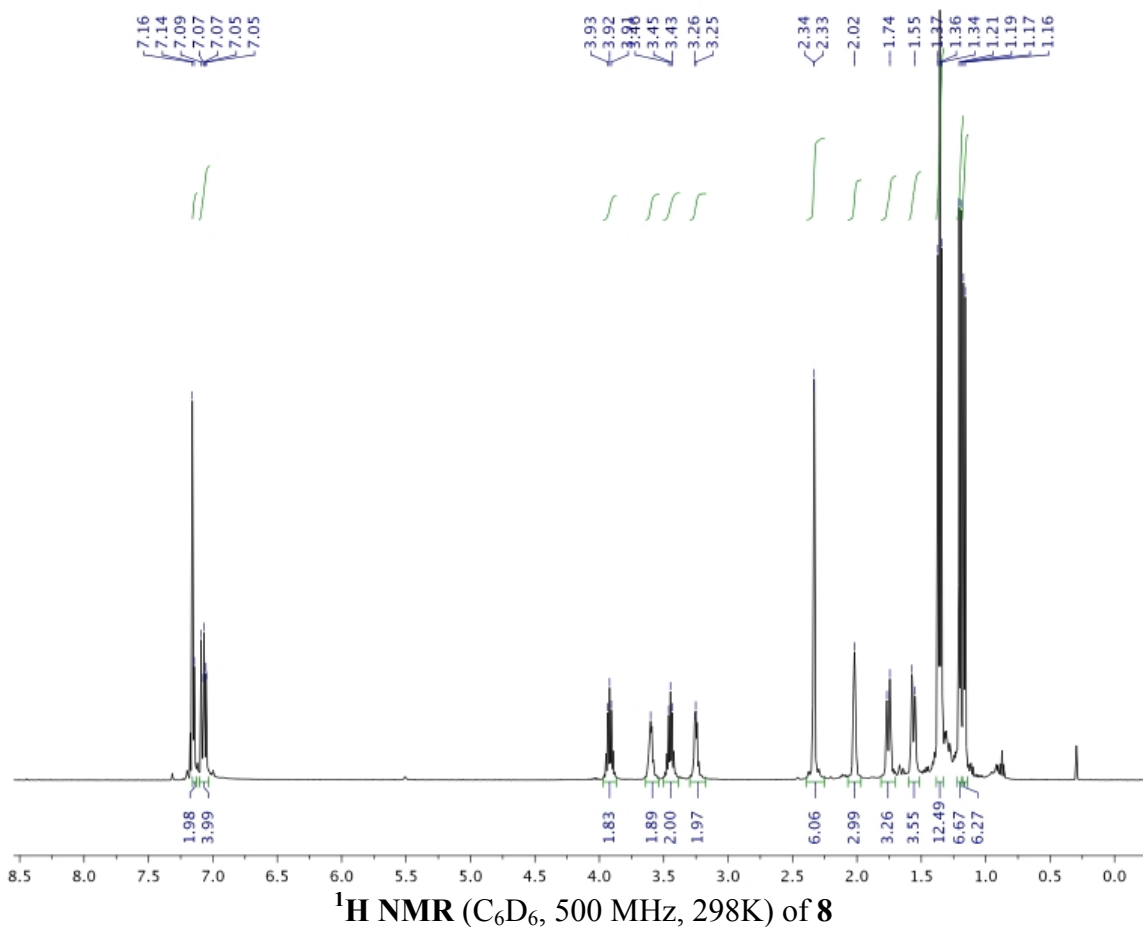

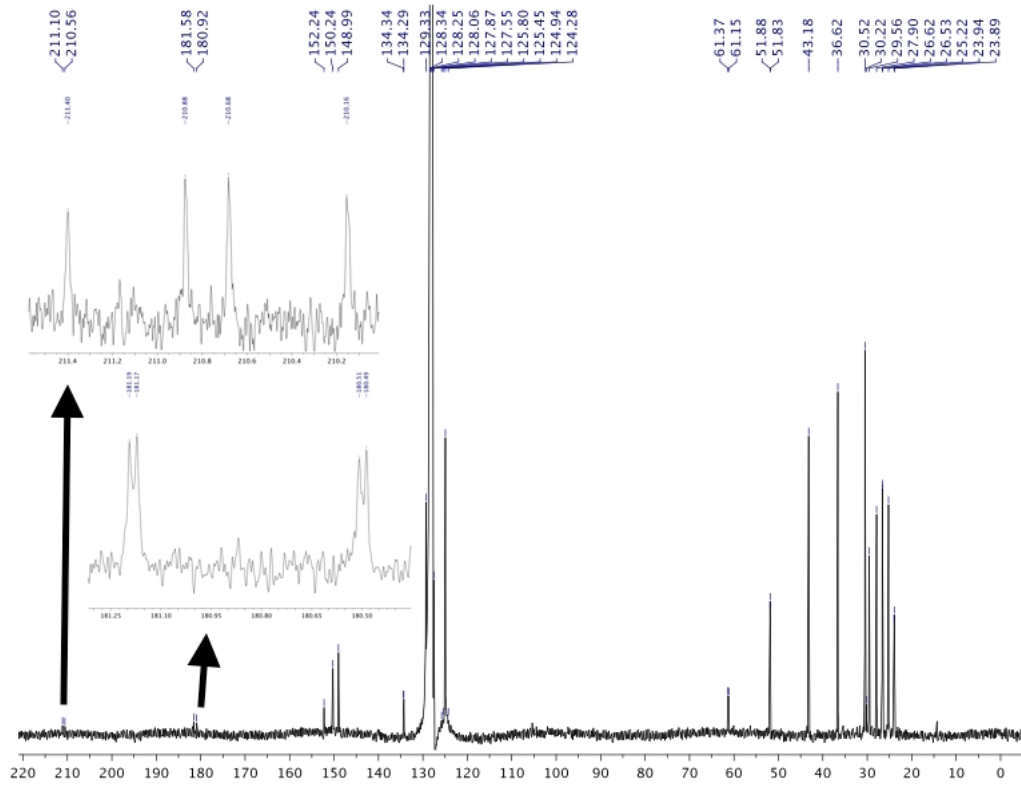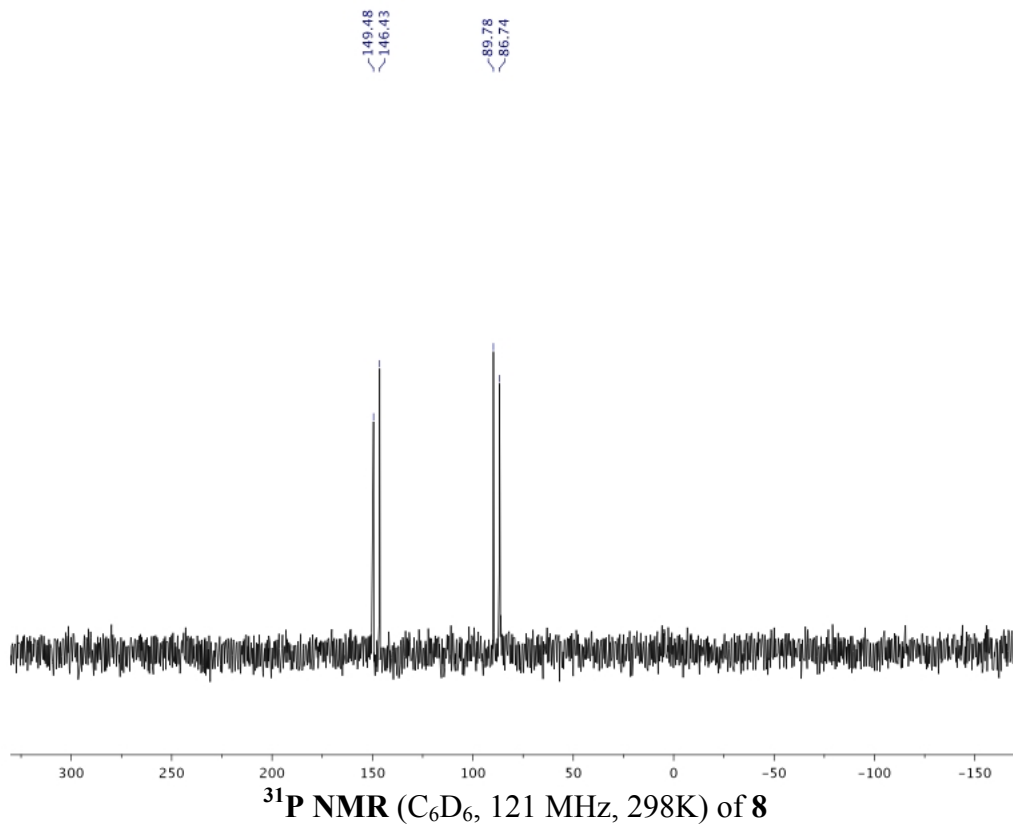

## Preparation of 9:

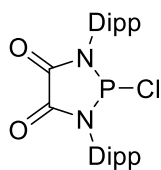

To a solution of N,N-bis(2,6-diisopropylphenyl)oxalamide<sup>2</sup> (3.5 g, 8.57 mmol) in THF (80 mL) was added at -78 °C dry NEt<sub>3</sub> (17.9 mL, 128 mmol, 15 eq.) followed by distilled PCl<sub>3</sub> (1.0 mL, 8.57 mmol, 1.0 eq.). The solution was stirred for 30 min at this temperature and then warmed up over night. The solvent was evaporated under reduced pressure and the compound extracted with benzene (60 mL). Evaporation of the solvent affords **9** as colorless solid (2.4 g, 5.1 mmol, 59%).

<sup>1</sup>H NMR (C<sub>6</sub>D<sub>6</sub>, 300 MHz, 298K): δ [ppm] = 7.24-7.19 (m, 2H), 7.17-7.12 (m, 2H), 7.04-7.01 (m, 2H), 3.37 (sept., *J* = 6.8 Hz, 2H), 3.05-2.97 (m, 2H), 1.25 (d, *J* = 6.8 Hz, 6H), 1.23 (d, *J* = 6.8 Hz, 6H), 1.13 (d, *J* = 6.8 Hz, 6H), 1.02 (d, *J* = 6.8 Hz, 6H); <sup>13</sup>C NMR (C<sub>6</sub>D<sub>6</sub>, 75 MHz, 298K): δ [ppm] = 156.8 (d, *J* = 3.6 Hz), 149.2, 146.0, 130.8, 128.6, 125.7, 124.7, 30.6, 30.5, 29.9, 25.0, 24.9, 24.0, 23.5, 23.5; <sup>31</sup>P NMR (C<sub>6</sub>D<sub>6</sub>, 121 MHz, 298K): δ [ppm] = 118.7 (s); HR-MS: *m/z* calculated for [M+H]<sup>+</sup> [C<sub>26</sub>H<sub>35</sub>ClN<sub>2</sub>O<sub>2</sub>P]<sup>+</sup> 473.2119; found 473.2123.

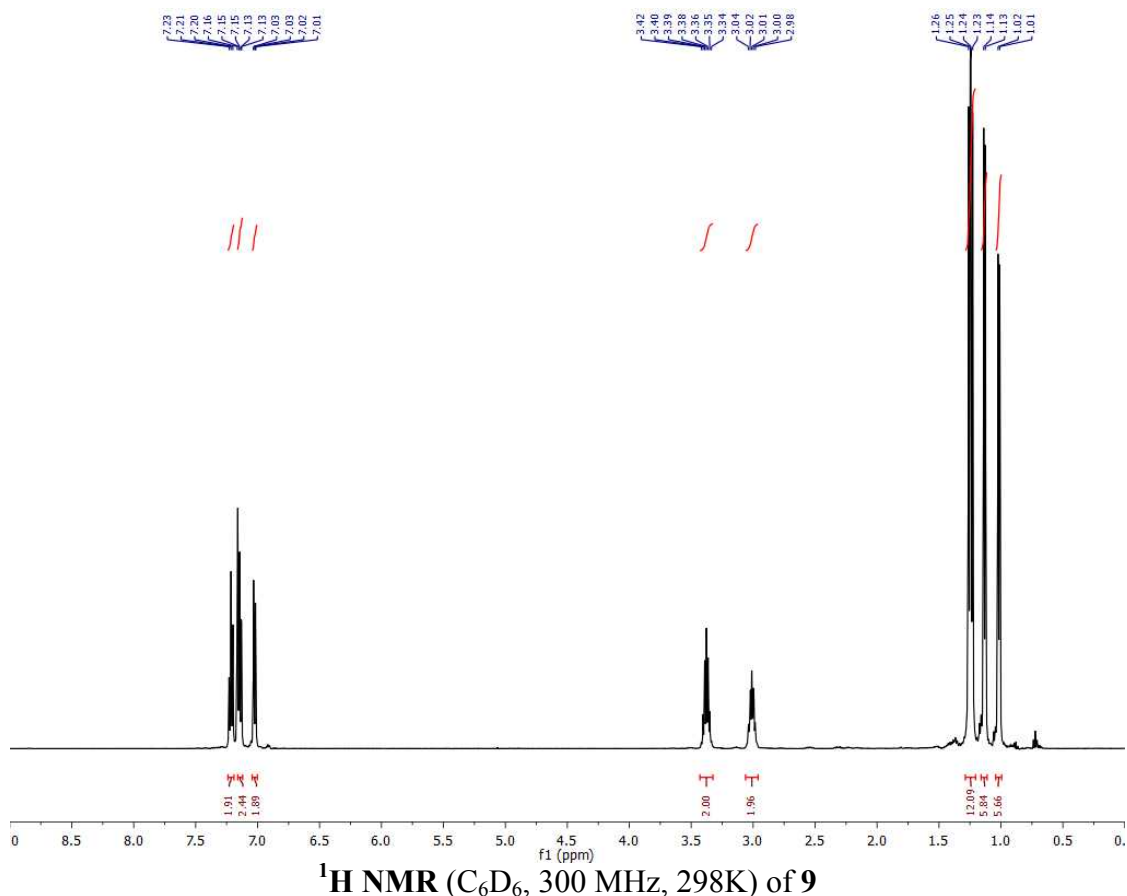

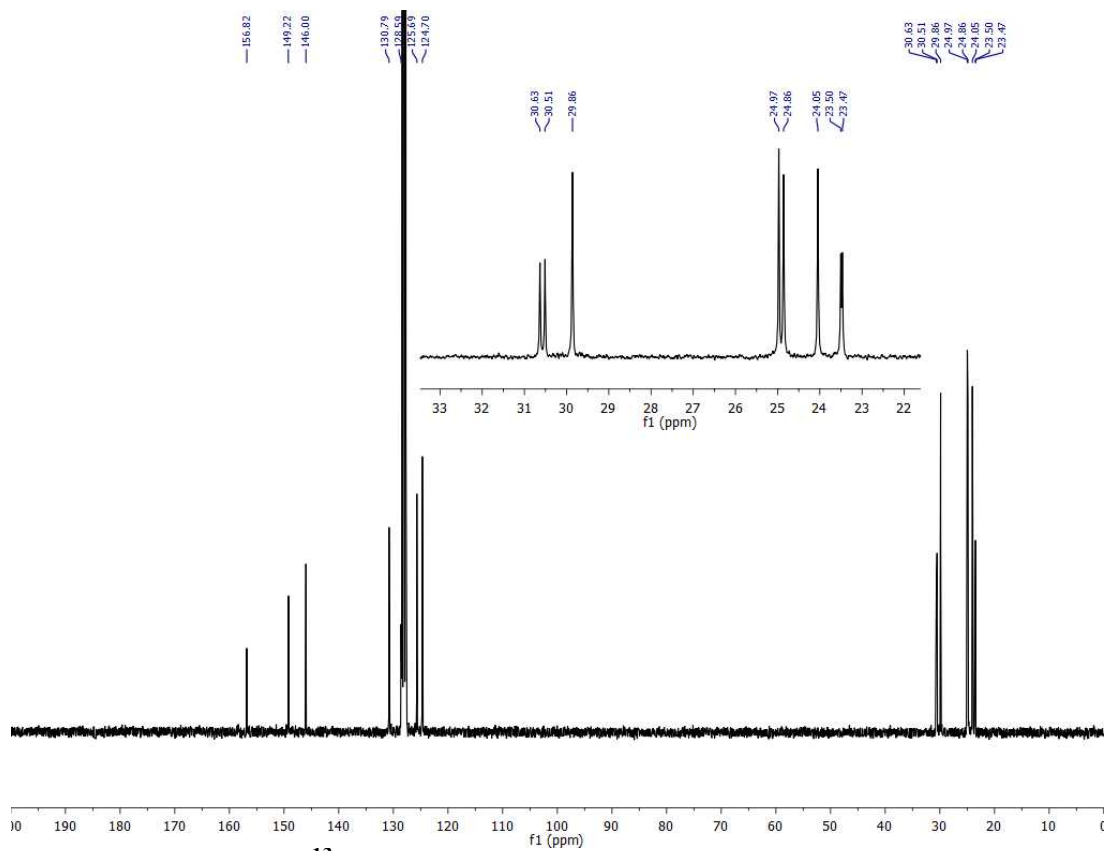

<sup>13</sup>C NMR (C<sub>6</sub>D<sub>6</sub>, 75 MHz, 298K) of **9**

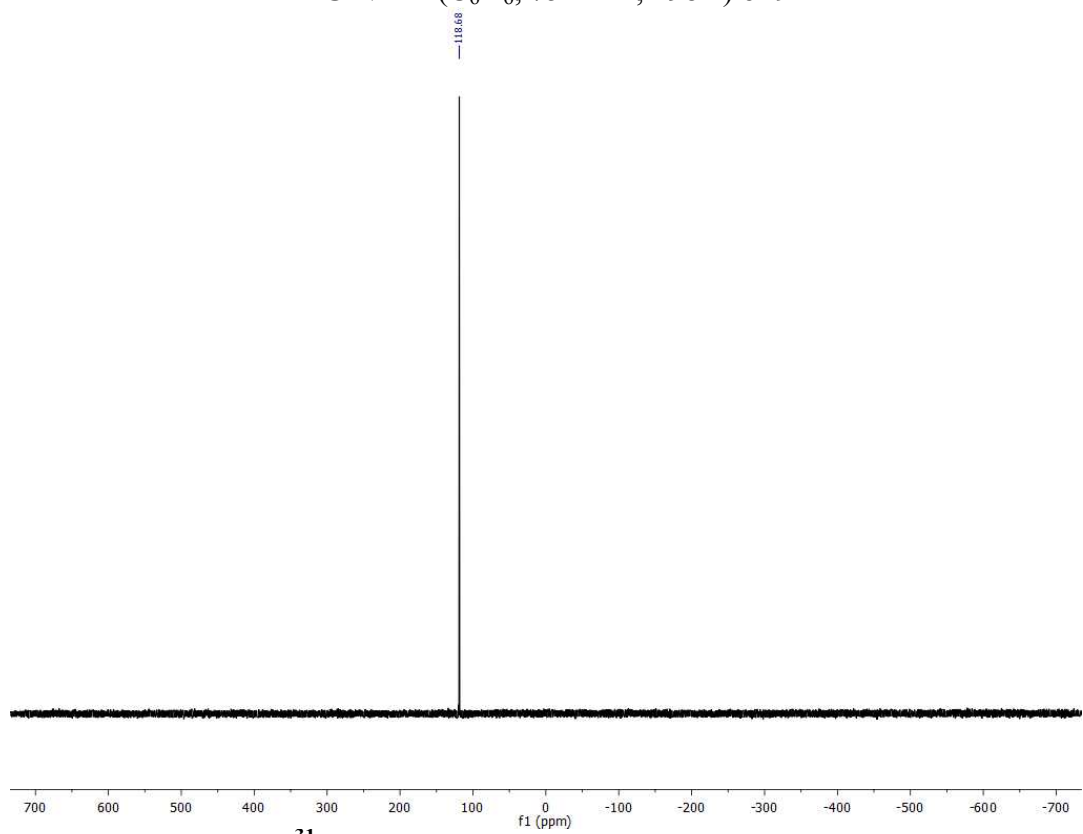

<sup>31</sup>P NMR (C<sub>6</sub>D<sub>6</sub>, 121 MHz, 298K) of **9**

## Preparation of 10:

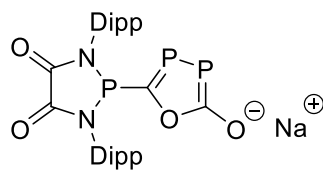

To a solution of **9** (100 mg, 0.21 mmol) in THF (3 mL) was added NaPCO(dioxane)<sub>3.0</sub> (150 mg, 0.433 mmol, 2.1 eq) at room temperature and stirred for 20 min. The clear solution turns into a dark orange suspension. The suspension is filtered and the remaining solid dissolved in CH<sub>3</sub>CN (4 mL). Layering the CH<sub>3</sub>CN solution with Et<sub>2</sub>O (10 mL) gives single crystals for x-ray diffraction. Removal of the solvent of the THF solution also affords the desired compound **10** as yellow solid (combined masses *m* = 87 mg, 72%). <sup>1</sup>H NMR (CD<sub>3</sub>CN, 300 MHz, 298K): δ [ppm] = 7.44-7.36 (m, 2H), 7.34-7.30 (m, 2H), 7.28-7.24 (m, 2H), 3.69-3.60 (m, 8H, coord. THF), 3.26-3.13 (m, 4H), 1.84-1.78 (m, 8H, coord. THF), 1.36 (d, *J* = 6.8 Hz, 6H), 1.18 (d, *J* = 6.8 Hz, 6H), 1.13 (d, *J* = 6.8 Hz, 6H), 0.83 (d, *J* = 6.8 Hz, 6H); <sup>13</sup>C NMR (CD<sub>3</sub>CN, 75 MHz, 298K): δ [ppm] = 203.8 (d, *J*<sub>CP</sub> = 105 Hz), 160.7, 156.1 (m), 149.9, 147.1, 130.9, 130.9, 130.4, 126.6, 125.1, 67.6 (coordinated THF), 30.6, 30.5, 29.1, 26.2 (coordinated THF), 25.0, 24.7, 24.4, 23.8, 23.8; <sup>31</sup>P NMR (CD<sub>3</sub>CN, 121 MHz, 298K): δ [ppm] = +322.7 (dd, *J* = 466 Hz, 282 Hz); 47.9 (d, *J* = 282 Hz); 45.3 (d, *J* = 466 Hz).

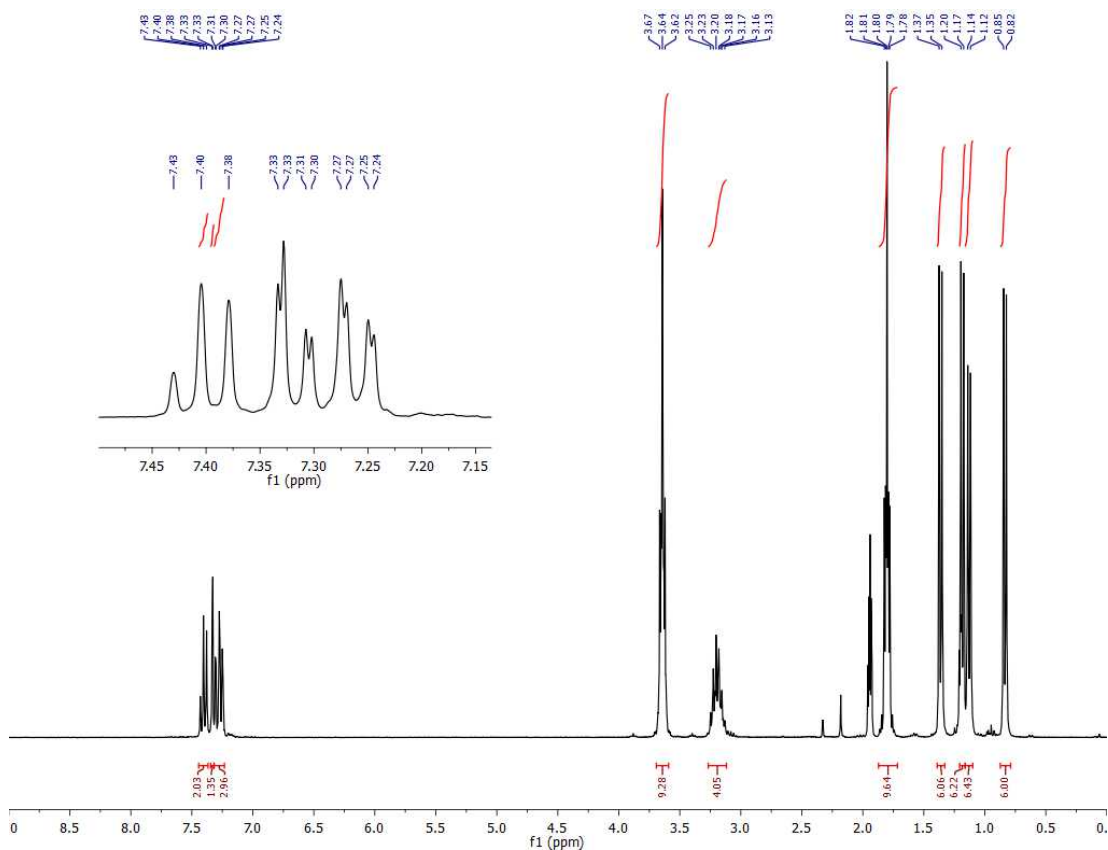

<sup>1</sup>H NMR (CD<sub>3</sub>CN, 300 MHz, 298K) of **10**

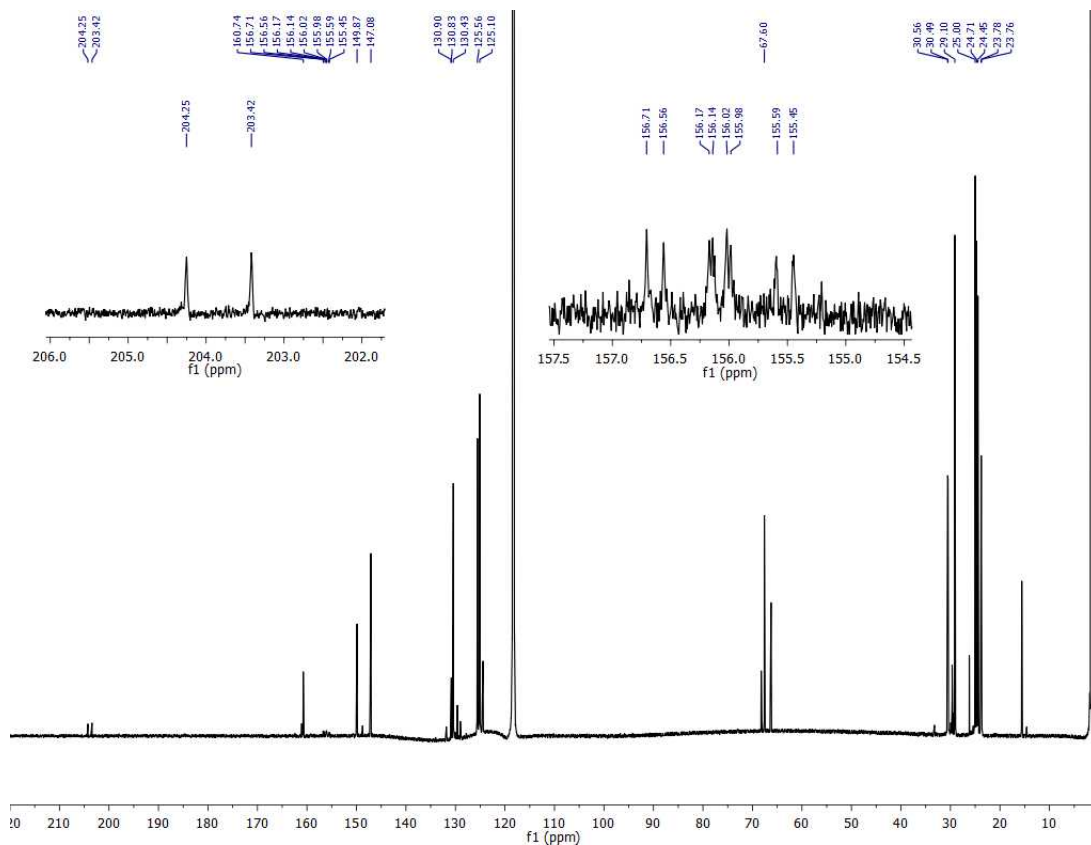

$^{13}\text{C}$  NMR ( $\text{CD}_3\text{CN}$ , 125 MHz, 298K) of **10**

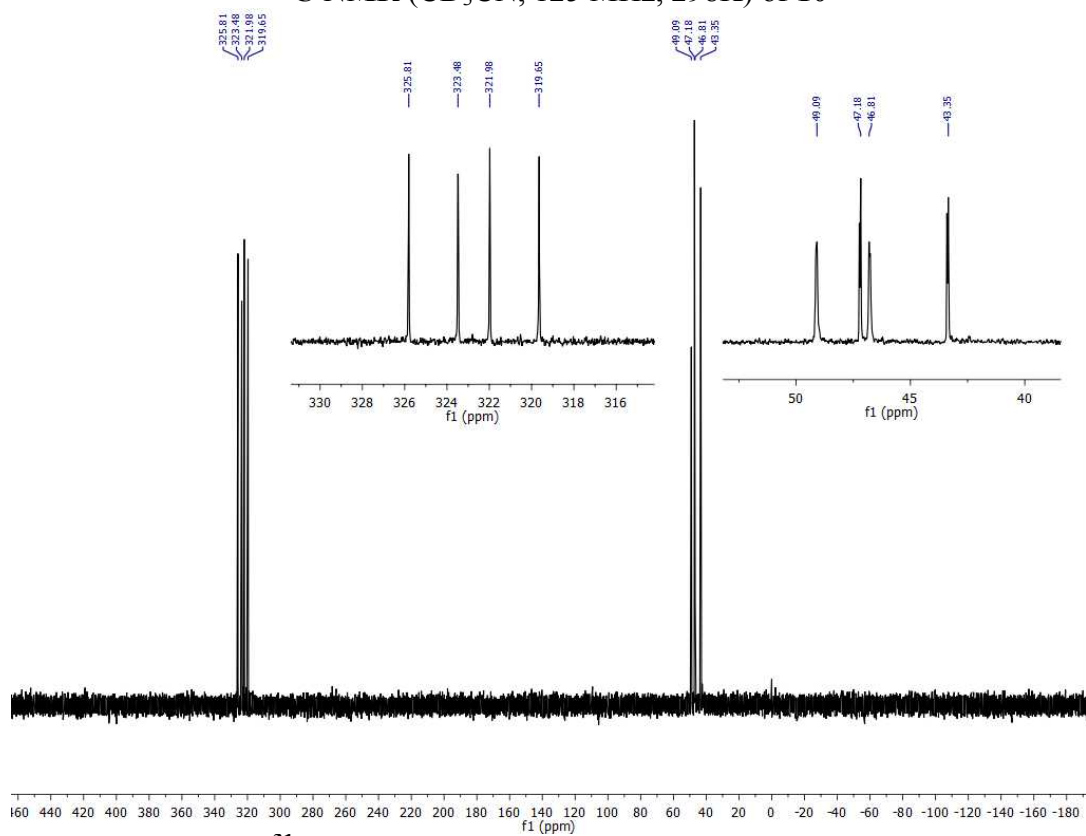

$^{31}\text{P}$  NMR ( $\text{CD}_3\text{CN}$ , 121 MHz, 298K) of **10**

### 3. X-ray data

**Xray Table 1. Crystal data and structure refinement for 4.**

|                                             |                                                                 |
|---------------------------------------------|-----------------------------------------------------------------|
| Identification code                         | BH3                                                             |
| Empirical formula                           | C <sub>27</sub> H <sub>41</sub> BN <sub>2</sub> OP <sub>2</sub> |
| Formula weight                              | 482.37                                                          |
| Temperature/K                               | 100.0                                                           |
| Crystal system                              | orthorhombic                                                    |
| Space group                                 | Pnma                                                            |
| a/Å                                         | 12.9335(12)                                                     |
| b/Å                                         | 20.8660(18)                                                     |
| c/Å                                         | 10.2861(9)                                                      |
| α/°                                         | 90                                                              |
| β/°                                         | 90                                                              |
| γ/°                                         | 90                                                              |
| Volume/Å <sup>3</sup>                       | 2775.9(4)                                                       |
| Z                                           | 4                                                               |
| ρ <sub>calc</sub> /cm <sup>3</sup>          | 1.154                                                           |
| μ/mm <sup>-1</sup>                          | 1.571                                                           |
| F(000)                                      | 1040.0                                                          |
| Crystal size/mm <sup>3</sup>                | 0.3 × 0.24 × 0.2                                                |
| Radiation                                   | CuKα (λ = 1.54178)                                              |
| 2θ range for data collection/°              | 8.474 to 136.656                                                |
| Index ranges                                | -15 ≤ h ≤ 11, -25 ≤ k ≤ 24, -12 ≤ l ≤ 12                        |
| Reflections collected                       | 24990                                                           |
| Independent reflections                     | 2624 [R <sub>int</sub> = 0.0474, R <sub>sigma</sub> = 0.0236]   |
| Data/restraints/parameters                  | 2624/24/182                                                     |
| Goodness-of-fit on F <sup>2</sup>           | 1.082                                                           |
| Final R indexes [I ≥ 2σ (I)]                | R <sub>1</sub> = 0.0597, wR <sub>2</sub> = 0.1716               |
| Final R indexes [all data]                  | R <sub>1</sub> = 0.0641, wR <sub>2</sub> = 0.1764               |
| Largest diff. peak/hole / e Å <sup>-3</sup> | 0.86/-0.94                                                      |

---

#### Summary of Data CCDC 1432815

---

**Compound Name: 4**

**Formula: C<sub>27</sub> H<sub>41</sub> B<sub>1</sub> N<sub>2</sub> O<sub>1</sub> P<sub>2,x</sub>(C<sub>1</sub> O<sub>1</sub>),0.16(B<sub>1</sub>)**

**Unit Cell Parameters: a 12.9335(12) b 20.8660(18) c 10.2861(9) Pnma**

---

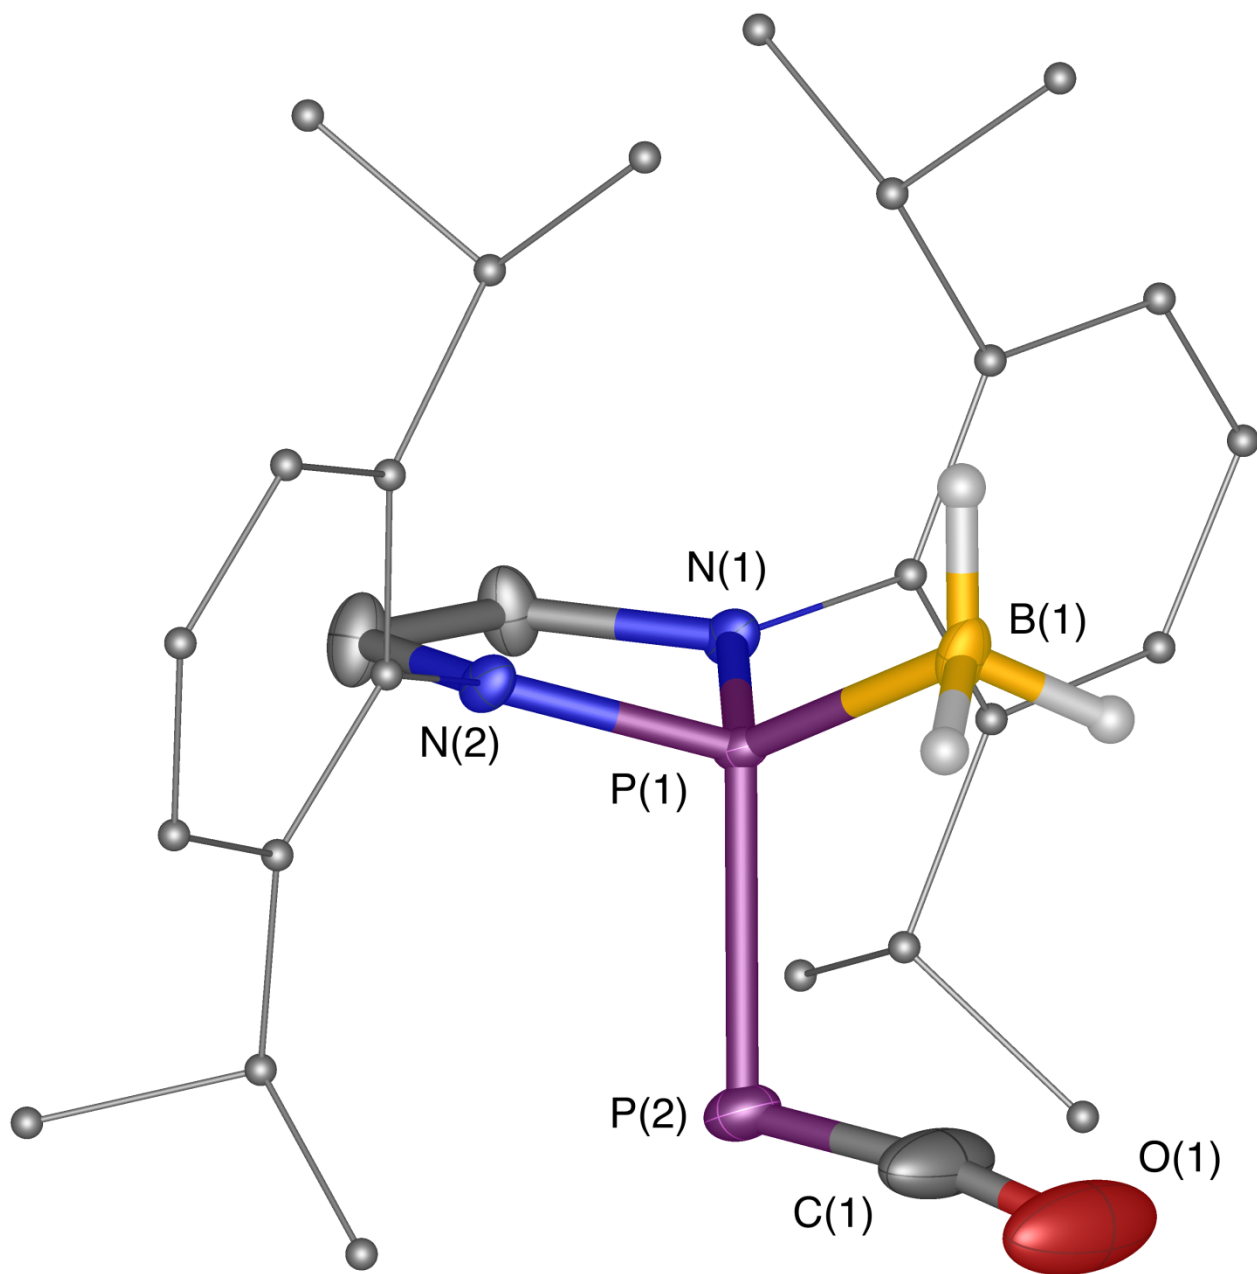

**Structure of 4 in the solid state.** All hydrogen atoms, except for BH<sub>3</sub>, omitted for clarity



## Xray Table 2. Crystal data and structure refinement for 5.

|                                             |                                                                                 |
|---------------------------------------------|---------------------------------------------------------------------------------|
| Identification code                         | BCF                                                                             |
| Empirical formula                           | C <sub>45</sub> H <sub>38</sub> BF <sub>15</sub> N <sub>2</sub> OP <sub>2</sub> |
| Formula weight                              | 980.52                                                                          |
| Temperature/K                               | 100                                                                             |
| Crystal system                              | monoclinic                                                                      |
| Space group                                 | P2 <sub>1</sub> /n                                                              |
| a/Å                                         | 14.0829(9)                                                                      |
| b/Å                                         | 20.6872(19)                                                                     |
| c/Å                                         | 15.9795(14)                                                                     |
| α/°                                         | 90                                                                              |
| β/°                                         | 99.559(5)                                                                       |
| γ/°                                         | 90                                                                              |
| Volume/Å <sup>3</sup>                       | 4590.8(7)                                                                       |
| Z                                           | 4                                                                               |
| ρ <sub>calc</sub> /cm <sup>3</sup>          | 1.419                                                                           |
| μ/mm <sup>-1</sup>                          | 0.193                                                                           |
| F(000)                                      | 2000.0                                                                          |
| Crystal size/mm <sup>3</sup>                | 0.32 × 0.25 × 0.25                                                              |
| Radiation                                   | MoKα (λ = 0.71073)                                                              |
| 2θ range for data collection/°              | 3.532 to 50.062                                                                 |
| Index ranges                                | -16 ≤ h ≤ 14, -22 ≤ k ≤ 24, -13 ≤ l ≤ 19                                        |
| Reflections collected                       | 24382                                                                           |
| Independent reflections                     | 8073 [R <sub>int</sub> = 0.1023, R <sub>sigma</sub> = 0.1109]                   |
| Data/restraints/parameters                  | 8073/0/603                                                                      |
| Goodness-of-fit on F <sup>2</sup>           | 0.983                                                                           |
| Final R indexes [I ≥ 2σ (I)]                | R <sub>1</sub> = 0.0572, wR <sub>2</sub> = 0.1234                               |
| Final R indexes [all data]                  | R <sub>1</sub> = 0.1148, wR <sub>2</sub> = 0.1501                               |
| Largest diff. peak/hole / e Å <sup>-3</sup> | 0.35/-0.31                                                                      |

---

### Summary of Data CCDC 1432814

---

**Compound Name:** 5

**Formula:** C<sub>45</sub> H<sub>38</sub> B<sub>1</sub> F<sub>15</sub> N<sub>2</sub> O<sub>1</sub> P<sub>2</sub>

**Unit Cell Parameters:** a 14.0829(9) b 20.6872(19) c 15.9795(14) P2<sub>1</sub>/n

---

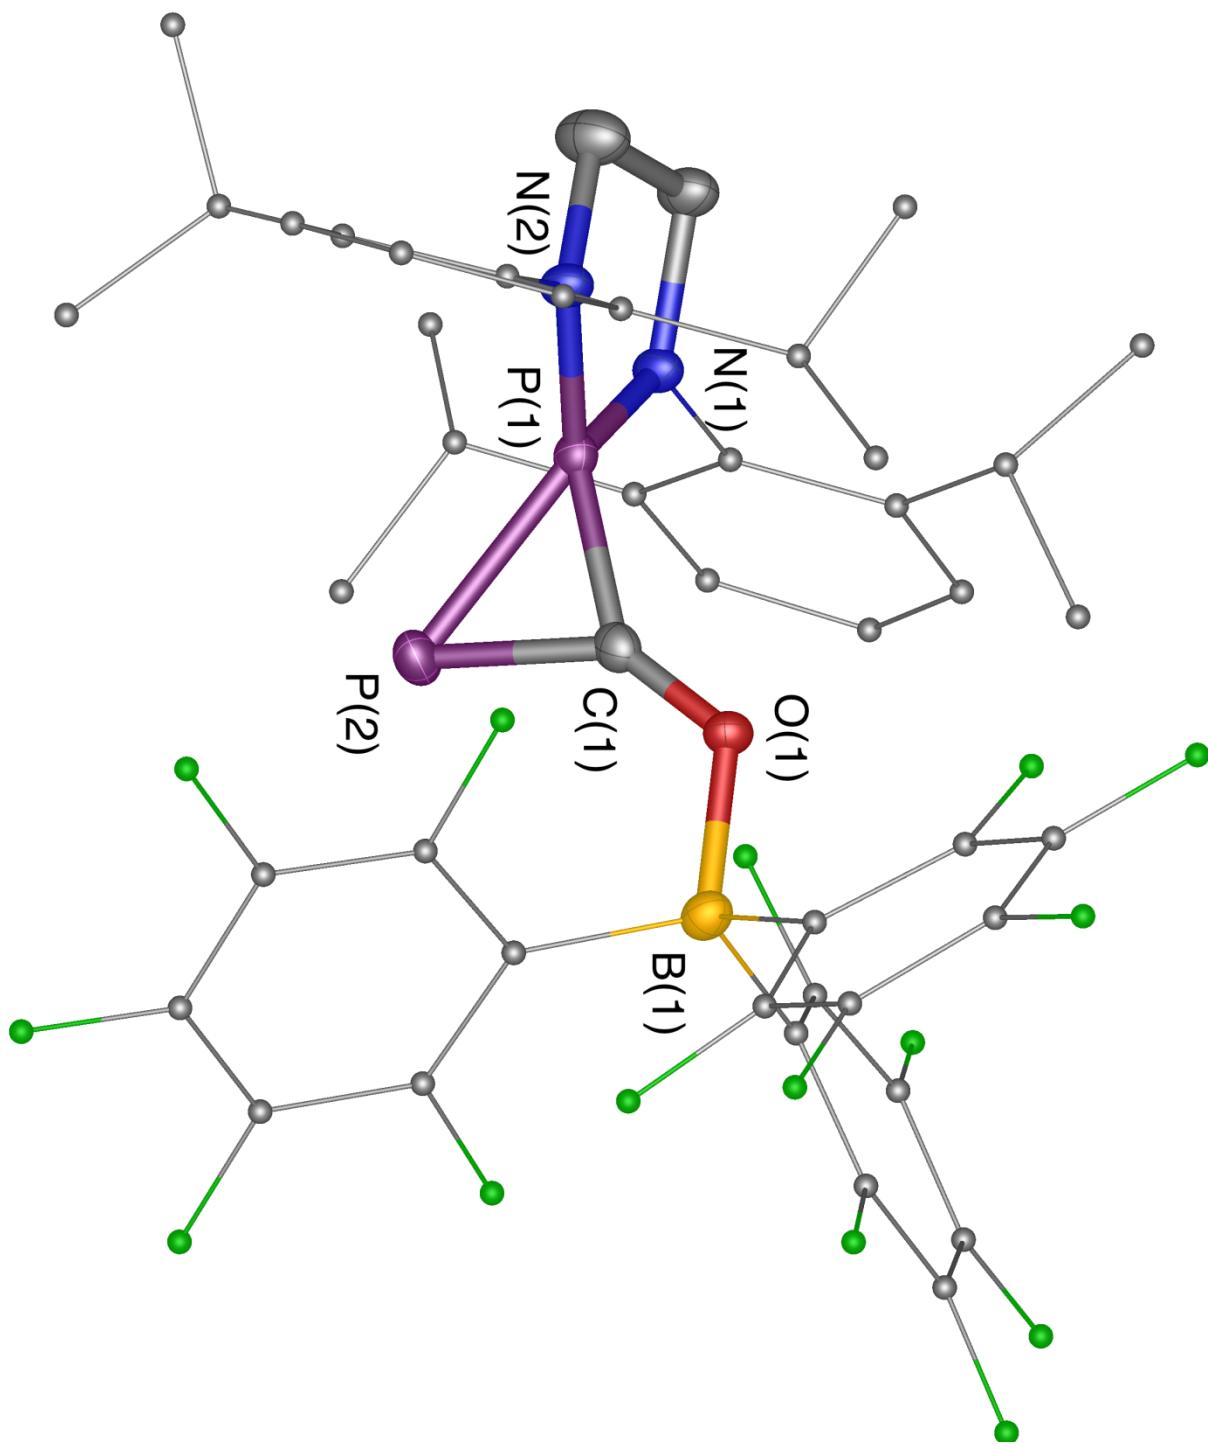

**Structure of 5 in the solid state.** All hydrogen atoms omitted for clarity

### Xray Table 3 Crystal data and structure refinement for 6.

|                                             |                                                                                                |
|---------------------------------------------|------------------------------------------------------------------------------------------------|
| Identification code                         | 6                                                                                              |
| Empirical formula                           | C <sub>218</sub> H <sub>276</sub> N <sub>4</sub> Na <sub>2</sub> O <sub>6</sub> P <sub>6</sub> |
| Formula weight                              | 3280.21                                                                                        |
| Temperature/K                               | 100.0                                                                                          |
| Crystal system                              | triclinic                                                                                      |
| Space group                                 | P-1                                                                                            |
| a/Å                                         | 14.6157(11)                                                                                    |
| b/Å                                         | 18.3339(15)                                                                                    |
| c/Å                                         | 23.554(2)                                                                                      |
| α/°                                         | 85.401(7)                                                                                      |
| β/°                                         | 81.374(6)                                                                                      |
| γ/°                                         | 78.671(5)                                                                                      |
| Volume/Å <sup>3</sup>                       | 6110.2(9)                                                                                      |
| Z                                           | 1                                                                                              |
| ρ <sub>calc</sub> /cm <sup>3</sup>          | 0.891                                                                                          |
| μ/mm <sup>-1</sup>                          | 0.783                                                                                          |
| F(000)                                      | 1772.0                                                                                         |
| Crystal size/mm <sup>3</sup>                | 0.3 × 0.1 × 0.1                                                                                |
| Radiation                                   | CuKα (λ = 1.54178)                                                                             |
| 2θ range for data collection/°              | 3.8 to 137.65                                                                                  |
| Index ranges                                | -17 ≤ h ≤ 17, -19 ≤ k ≤ 21, -28 ≤ l ≤ 27                                                       |
| Reflections collected                       | 102657                                                                                         |
| Independent reflections                     | 21898 [R <sub>int</sub> = 0.0672, R <sub>sigma</sub> = 0.0576]                                 |
| Data/restraints/parameters                  | 21898/30/1157                                                                                  |
| Goodness-of-fit on F <sup>2</sup>           | 1.020                                                                                          |
| Final R indexes [I ≥ 2σ (I)]                | R <sub>1</sub> = 0.0850, wR <sub>2</sub> = 0.2248                                              |
| Final R indexes [all data]                  | R <sub>1</sub> = 0.1025, wR <sub>2</sub> = 0.2404                                              |
| Largest diff. peak/hole / e Å <sup>-3</sup> | 1.34/-0.65                                                                                     |

---

#### Summary of Data CCDC 1528506

---

**Compound Name: 6**

**Formula: C<sub>218</sub> H<sub>276</sub> N<sub>4</sub> Na<sub>2</sub> O<sub>6</sub> P<sub>6</sub>**

**Unit Cell Parameters: a 14.6157(11) b 18.3339(15) c 23.554(2) P-1**

---

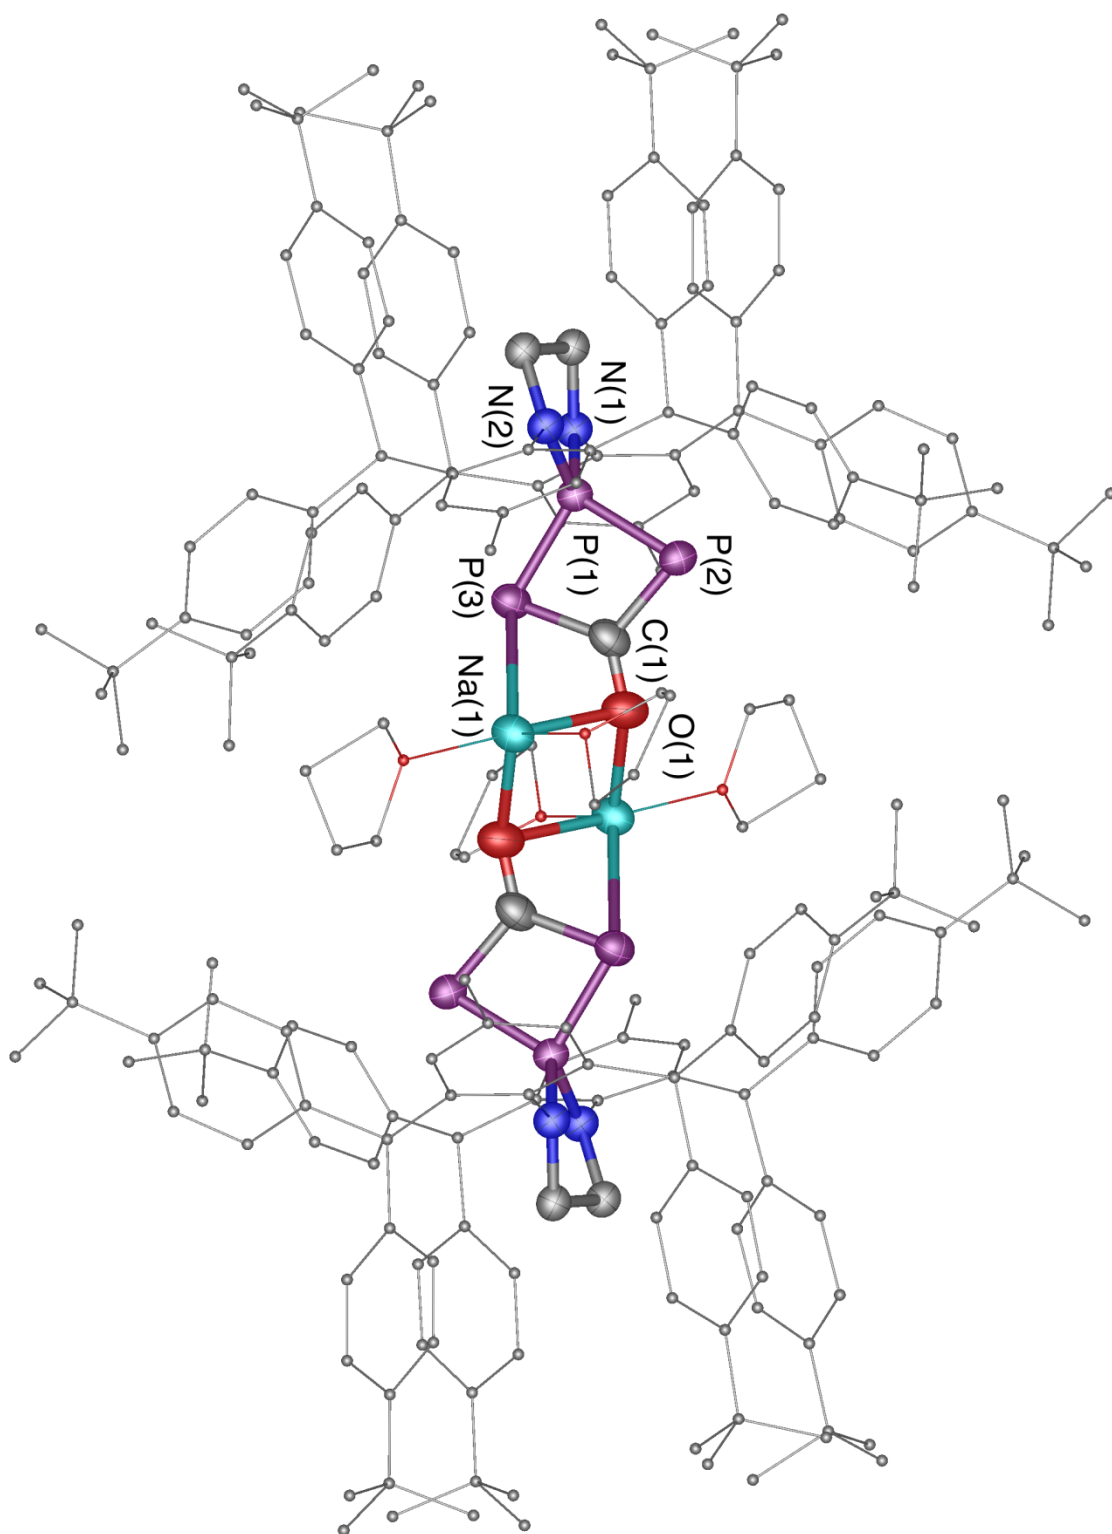

Structure of **6** in the solid state. All hydrogen atoms omitted for clarity.

#### Xray Table 4 Crystal data and structure refinement for 7.

|                                        |                                                                 |
|----------------------------------------|-----------------------------------------------------------------|
| Identification code                    | Crown                                                           |
| Crystal system                         | trigonal                                                        |
| Space group                            | P-3                                                             |
| a/Å                                    | 26.1613(10)                                                     |
| b/Å                                    | 26.1613(10)                                                     |
| c/Å                                    | 38.921(2)                                                       |
| $\alpha$ /°                            | 90                                                              |
| $\beta$ /°                             | 90                                                              |
| $\gamma$ /°                            | 120                                                             |
| Volume/Å <sup>3</sup>                  | 23069(2)                                                        |
| Z                                      | 8                                                               |
| $\rho_{\text{calc}}/\text{cm}^3$       | 1.313                                                           |
| $\mu/\text{mm}^{-1}$                   | 1.071                                                           |
| F(000)                                 | 9688.0                                                          |
| Crystal size/mm <sup>3</sup>           | 0.1 × 0.2 × 0.15                                                |
| Radiation                              | CuK $\alpha$ ( $\lambda$ = 1.54178)                             |
| 2 $\theta$ range for data collection/° | 3.9 to 101.108                                                  |
| Index ranges                           | -26 ≤ h ≤ 26, -25 ≤ k ≤ 26, -38 ≤ l ≤ 38                        |
| Reflections collected                  | 136290                                                          |
| Independent reflections                | 16142 [ $R_{\text{int}}$ = 0.0937, $R_{\text{sigma}}$ = 0.0663] |
| Data/restraints/parameters             | 16142/1234/1329                                                 |
| Goodness-of-fit on F <sup>2</sup>      | 2.429                                                           |

Structure could not be refined below 16%. Hence the corresponding data which only allowed us to confirm the formation of this species has not been submitted to the CCDC.

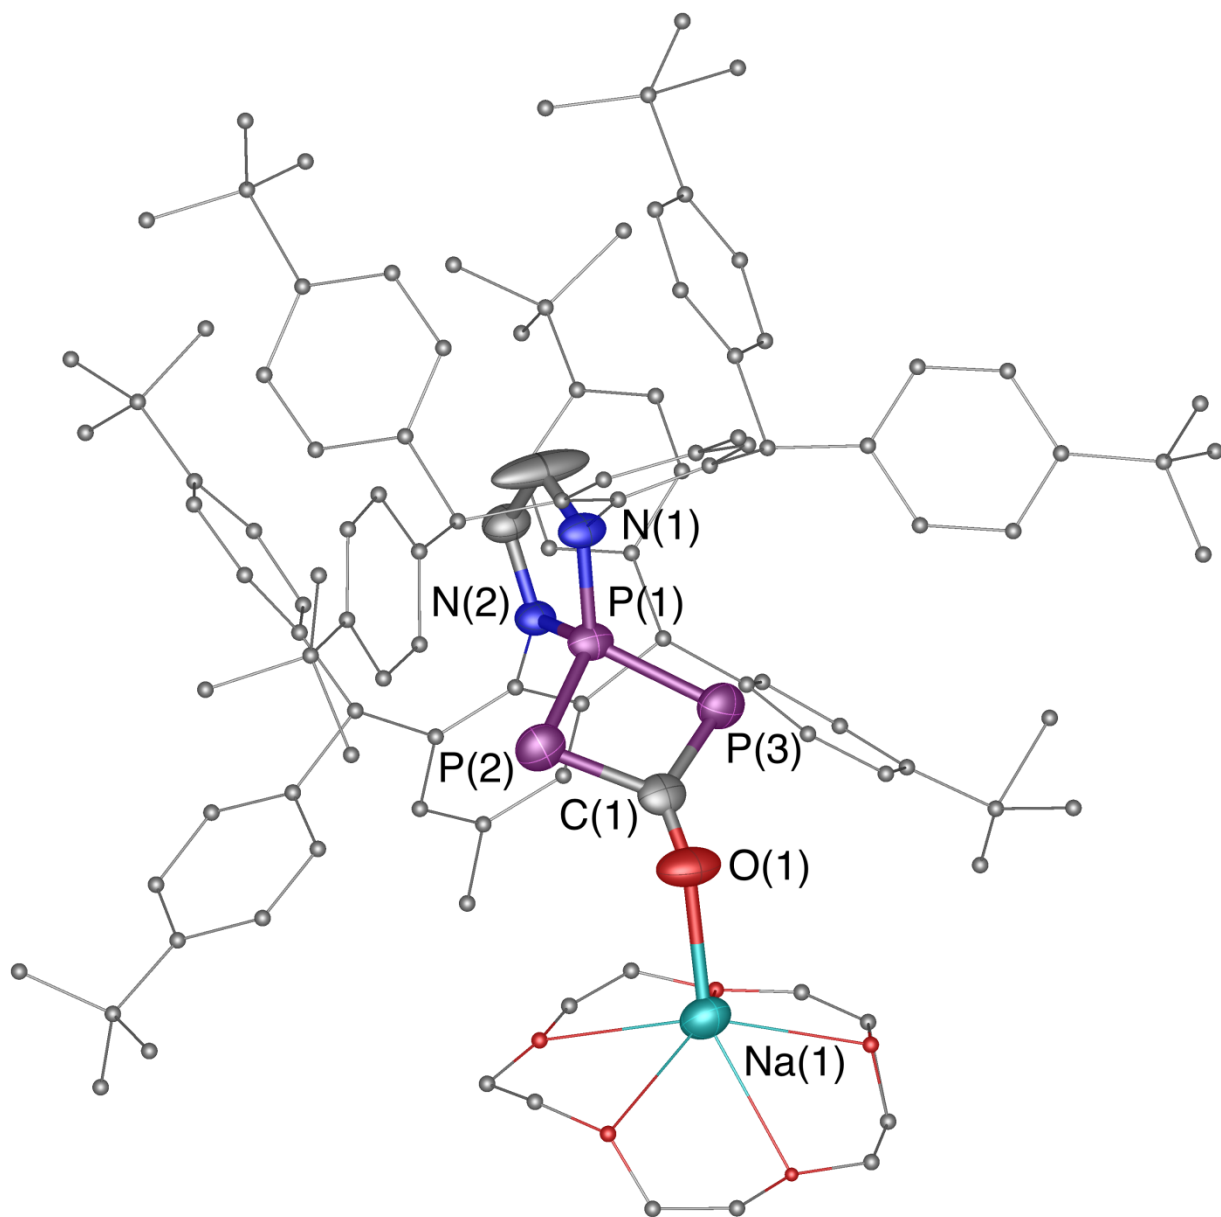

Structure of **7** in the solid state. All hydrogen atoms omitted for clarity

### Xray Table 5 Crystal data and structure refinement for 8.

|                                             |                                                                |
|---------------------------------------------|----------------------------------------------------------------|
| Identification code                         | Adamant                                                        |
| Empirical formula                           | C <sub>38</sub> H <sub>53</sub> N <sub>3</sub> OP <sub>2</sub> |
| Formula weight                              | 629.77                                                         |
| Temperature/K                               | 100.15                                                         |
| Crystal system                              | orthorhombic                                                   |
| Space group                                 | Pnma                                                           |
| a/Å                                         | 21.5089(11)                                                    |
| b/Å                                         | 17.8123(9)                                                     |
| c/Å                                         | 9.2449(5)                                                      |
| α/°                                         | 90                                                             |
| β/°                                         | 90                                                             |
| γ/°                                         | 90                                                             |
| Volume/Å <sup>3</sup>                       | 3541.9(3)                                                      |
| Z                                           | 4                                                              |
| ρ <sub>calc</sub> /cm <sup>3</sup>          | 1.181                                                          |
| μ/mm <sup>-1</sup>                          | 0.156                                                          |
| F(000)                                      | 1360.0                                                         |
| Crystal size/mm <sup>3</sup>                | 0.28 × 0.25 × 0.2                                              |
| Radiation                                   | MoKα (λ = 0.71073)                                             |
| 2θ range for data collection/°              | 4.574 to 50.99                                                 |
| Index ranges                                | -26 ≤ h ≤ 22, -17 ≤ k ≤ 21, -11 ≤ l ≤ 11                       |
| Reflections collected                       | 24783                                                          |
| Independent reflections                     | 3402 [R <sub>int</sub> = 0.0784, R <sub>sigma</sub> = 0.0495]  |
| Data/restraints/parameters                  | 3402/0/218                                                     |
| Goodness-of-fit on F <sup>2</sup>           | 1.059                                                          |
| Final R indexes [I ≥ 2σ (I)]                | R <sub>1</sub> = 0.0483, wR <sub>2</sub> = 0.1031              |
| Final R indexes [all data]                  | R <sub>1</sub> = 0.0724, wR <sub>2</sub> = 0.1140              |
| Largest diff. peak/hole / e Å <sup>-3</sup> | 0.49/-0.42                                                     |

---

#### Summary of Data CCDC 1432817

---

**Compound Name: 8**

**Formula: C38 H53 N3 O1 P2**

**Unit Cell Parameters: a 21.5089(11) b 17.8123(9) c 9.2449(5) Pnma**

---

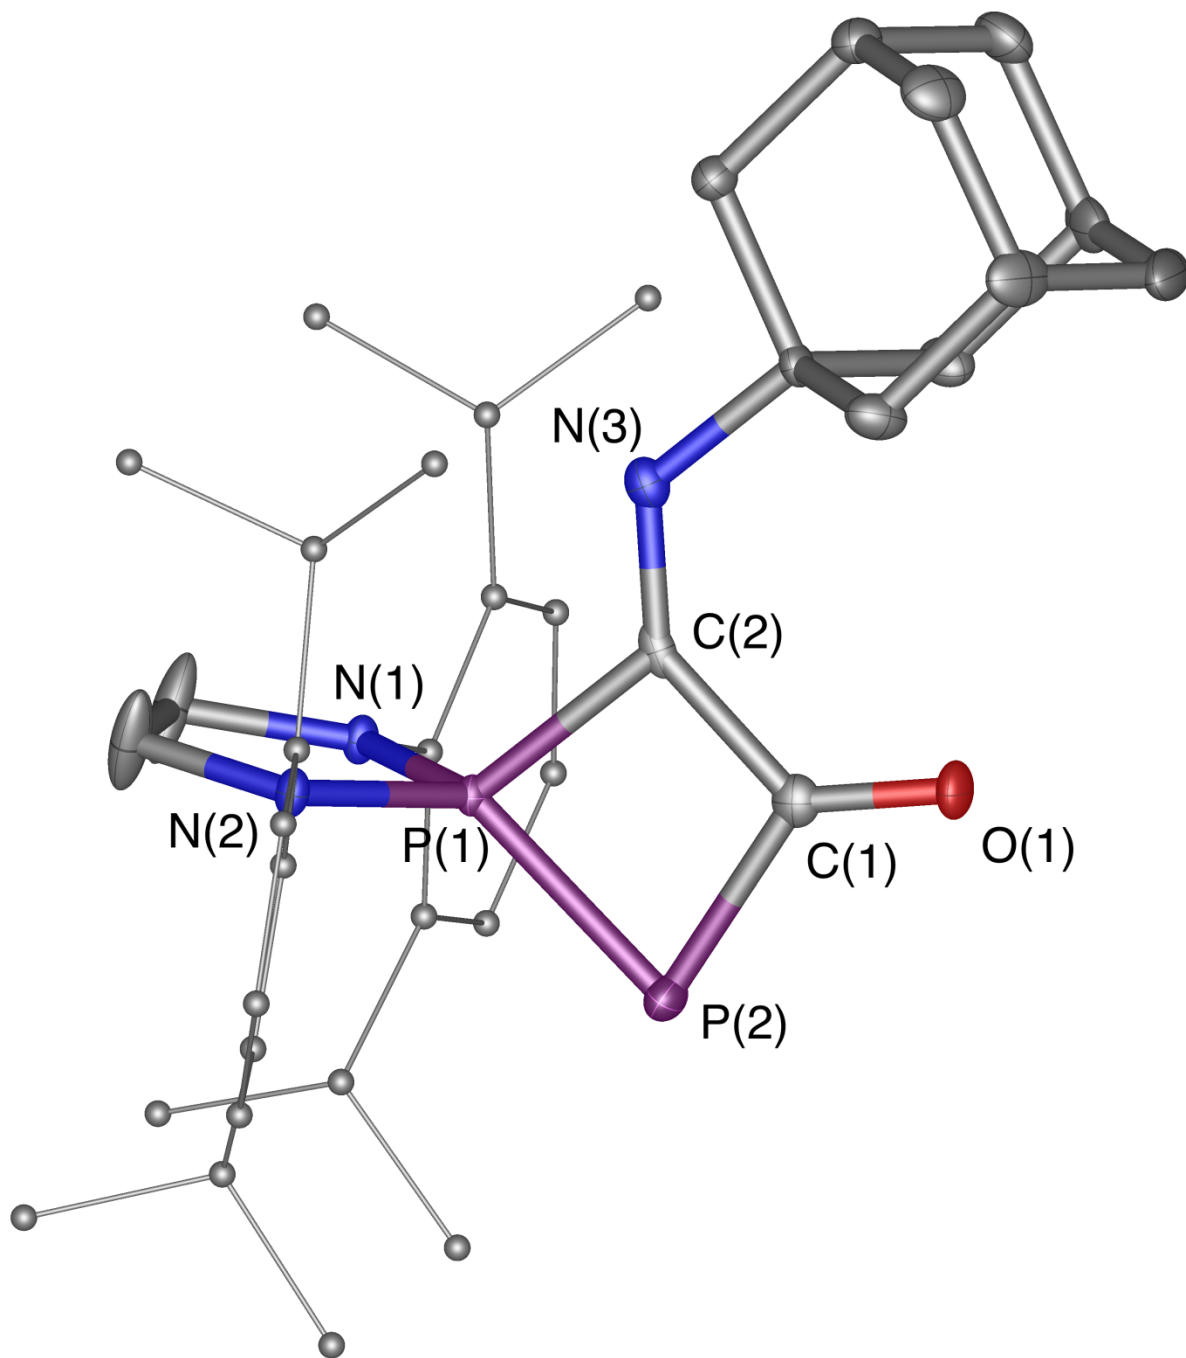

Structure of **8** in the solid state. All hydrogen atoms omitted for clarity.



## Xray Table 6 Crystal data and structure refinement for 10.

|                                             |                                          |
|---------------------------------------------|------------------------------------------|
| Identification code                         | gb_liuamidep4_0m                         |
| Empirical formula                           | C40H58N2NaO7P3                           |
| Formula weight                              | 794.78                                   |
| Temperature/K                               | 100.0                                    |
| Crystal system                              | orthorhombic                             |
| Space group                                 | P212121                                  |
| a/Å                                         | 13.7779(4)                               |
| b/Å                                         | 14.7189(4)                               |
| c/Å                                         | 21.2291(6)                               |
| $\alpha$ /°                                 | 90                                       |
| $\beta$ /°                                  | 90                                       |
| $\gamma$ /°                                 | 90                                       |
| Volume/Å <sup>3</sup>                       | 4305.2(2)                                |
| Z                                           | 4                                        |
| $\rho$ calc/cm <sup>3</sup>                 | 1.226                                    |
| $\mu$ /mm <sup>-1</sup>                     | 1.755                                    |
| F(000)                                      | 1696.0                                   |
| Crystal size/mm <sup>3</sup>                | 0.1 × 0.1 × 0.1                          |
| Radiation                                   | CuK $\alpha$ ( $\lambda$ = 1.54178)      |
| 2 $\theta$ range for data collection/°      | 7.308 to 140.016                         |
| Index ranges                                | -16 ≤ h ≤ 16, -17 ≤ k ≤ 16, -25 ≤ l ≤ 25 |
| Reflections collected                       | 77347                                    |
| Independent reflections                     | 8126 [Rint = 0.0657, Rsigma = 0.0403]    |
| Data/restraints/parameters                  | 8126/30/509                              |
| Goodness-of-fit on F <sup>2</sup>           | 1.055                                    |
| Final R indexes [ $I \geq 2\sigma(I)$ ]     | R1 = 0.0622, wR2 = 0.1736                |
| Final R indexes [all data]                  | R1 = 0.0649, wR2 = 0.1762                |
| Largest diff. peak/hole / e Å <sup>-3</sup> | 0.57/-0.40                               |
| Flack parameter                             | 0.024(6)                                 |

---

### Summary of Data CCDC 1528508

---

**Compound Name: 10**

**Formula: (C40 H58 N2 Na1 O7 P3)n**

**Unit Cell Parameters: a 13.7779(4) b 14.7189(4) c 21.2291(6) P212121**

---

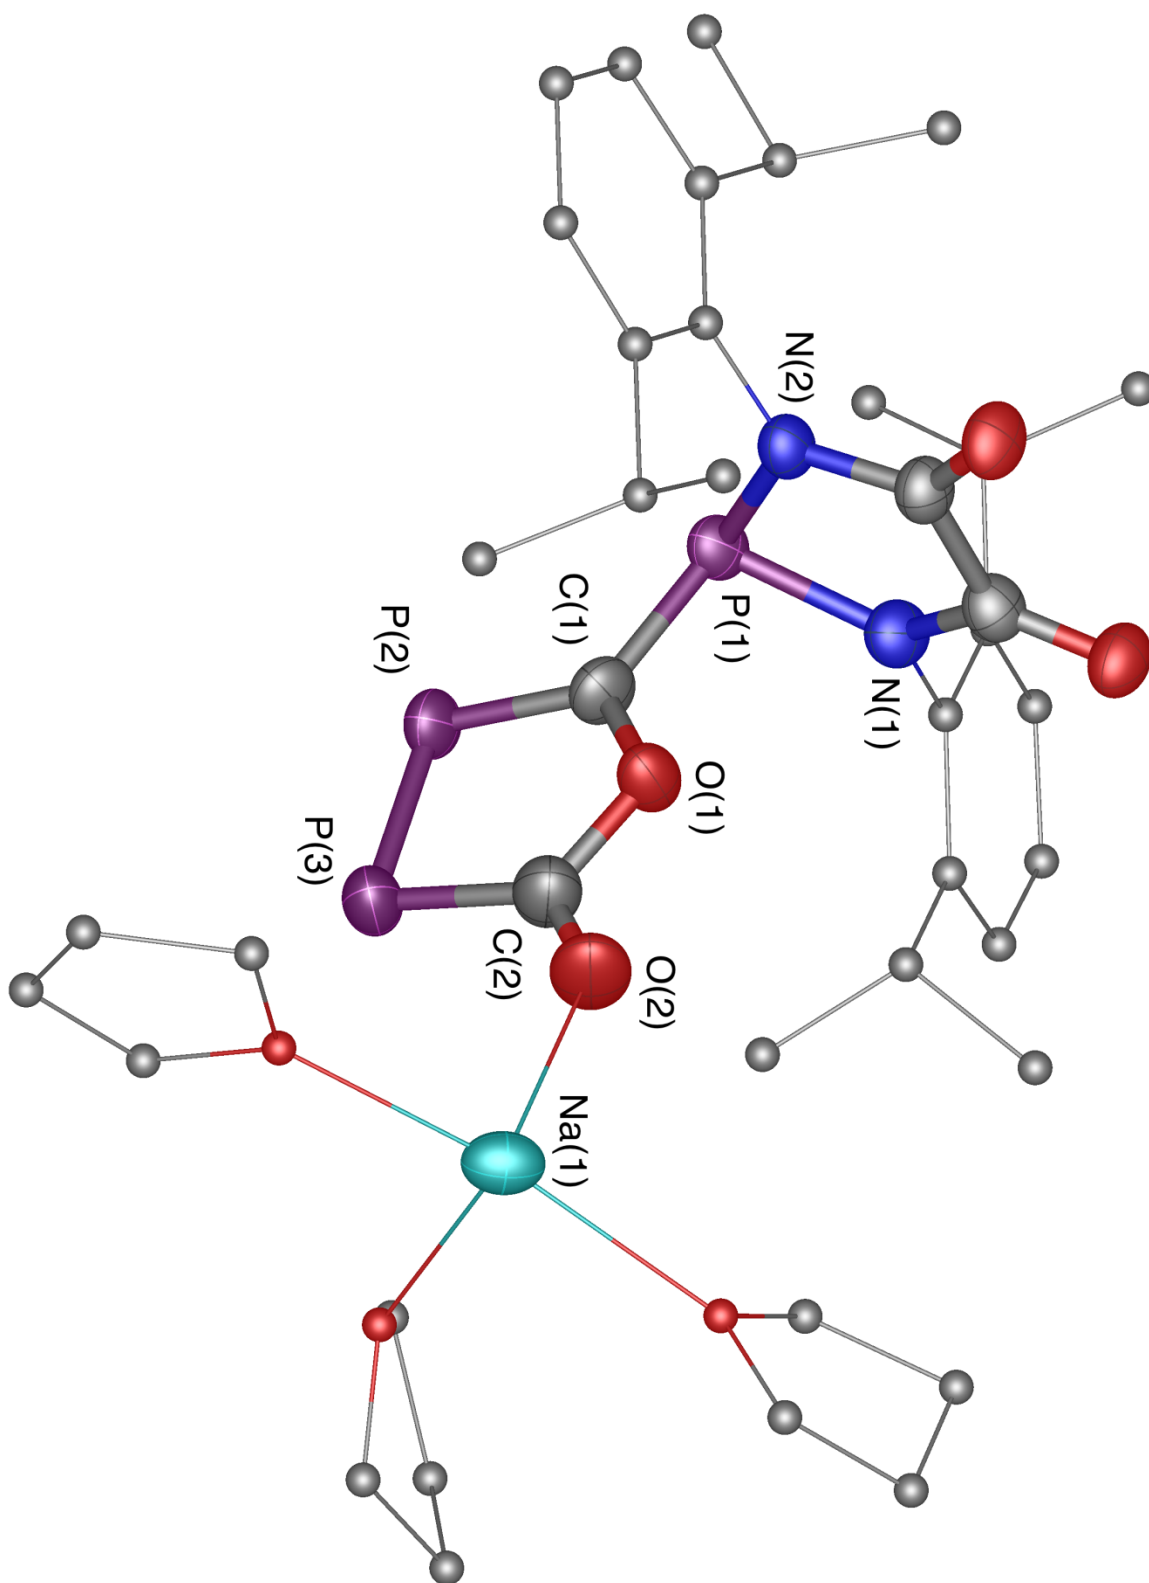

Structure of **10** in the solid state. All hydrogen atoms omitted for clarity.

### Xray Table 7 Crystal data and structure refinement for 10<sup>7</sup>.

|                                             |                                                                                               |
|---------------------------------------------|-----------------------------------------------------------------------------------------------|
| Identification code                         | GB_RJ_MH5_48                                                                                  |
| Empirical formula                           | C <sub>70</sub> H <sub>99</sub> N <sub>5</sub> Na <sub>2</sub> O <sub>11</sub> P <sub>6</sub> |
| Formula weight                              | 1418.34                                                                                       |
| Temperature/K                               | 100.0                                                                                         |
| Crystal system                              | monoclinic                                                                                    |
| Space group                                 | P2 <sub>1</sub> /c                                                                            |
| a/Å                                         | 27.6426(13)                                                                                   |
| b/Å                                         | 11.7291(6)                                                                                    |
| c/Å                                         | 24.5253(12)                                                                                   |
| α/°                                         | 90                                                                                            |
| β/°                                         | 103.246(2)                                                                                    |
| γ/°                                         | 90                                                                                            |
| Volume/Å <sup>3</sup>                       | 7740.1(7)                                                                                     |
| Z                                           | 4                                                                                             |
| ρ <sub>calc</sub> /cm <sup>3</sup>          | 1.217                                                                                         |
| μ/mm <sup>-1</sup>                          | 1.867                                                                                         |
| F(000)                                      | 3016.0                                                                                        |
| Crystal size/mm <sup>3</sup>                | 0.18 × 0.15 × 0.15                                                                            |
| Radiation                                   | CuKα (λ = 1.54178)                                                                            |
| 2θ range for data collection/°              | 6.57 to 140.512                                                                               |
| Index ranges                                | -33 ≤ h ≤ 33, -14 ≤ k ≤ 14, -29 ≤ l ≤ 29                                                      |
| Reflections collected                       | 127799                                                                                        |
| Independent reflections                     | 14712 [R <sub>int</sub> = 0.0510, R <sub>sigma</sub> = 0.0230]                                |
| Data/restraints/parameters                  | 14712/0/872                                                                                   |
| Goodness-of-fit on F <sup>2</sup>           | 1.029                                                                                         |
| Final R indexes [I ≥ 2σ (I)]                | R <sub>1</sub> = 0.0355, wR <sub>2</sub> = 0.0924                                             |
| Final R indexes [all data]                  | R <sub>1</sub> = 0.0409, wR <sub>2</sub> = 0.0961                                             |
| Largest diff. peak/hole / e Å <sup>-3</sup> | 0.76/-0.58                                                                                    |

---

#### Summary of Data CCDC 1528507

---

**Compound Name: 10b**

**Formula: (C<sub>36</sub> H<sub>52</sub> N<sub>2</sub> Na<sub>1</sub> O<sub>6</sub> P<sub>3</sub>)<sub>n</sub>, (C<sub>34</sub> H<sub>47</sub> N<sub>3</sub> Na<sub>1</sub> O<sub>5</sub> P<sub>3</sub>)<sub>n</sub>**

**Unit Cell Parameters: a 27.6426(13) b 11.7291(6) c 24.5253(12) P2<sub>1</sub>/c**

---

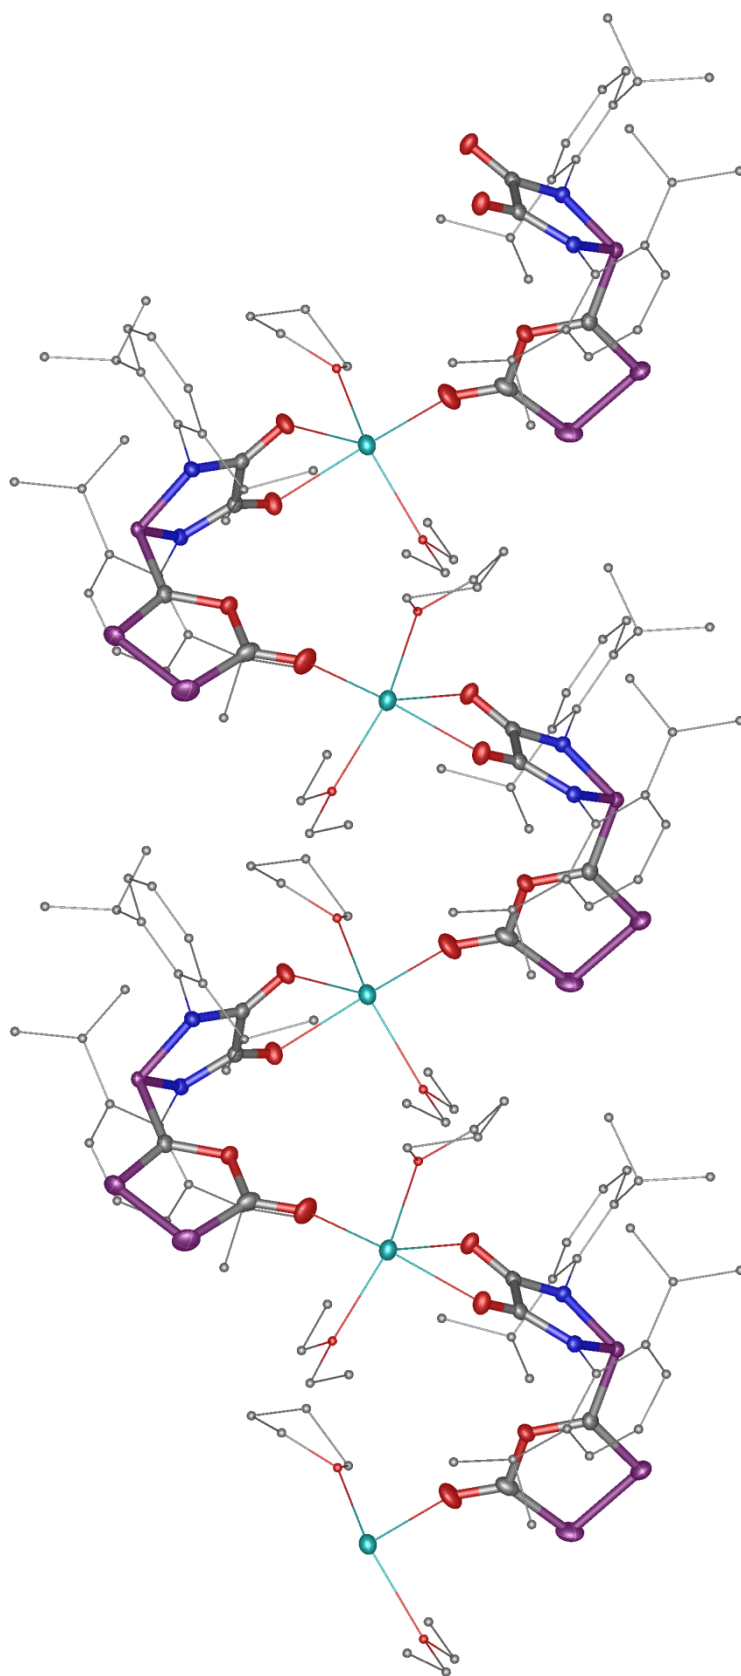

Structure of **10'** in the solid state. All hydrogen atoms omitted for clarity.

#### 4. Computational part

Calculations were carried out with the Gaussian 09 package<sup>3</sup> (version g09, rev.d01). Geometry optimizations were performed with the B3LYP<sup>4</sup> or M06-2X<sup>5</sup> functional. The def2-TZVP, 6-31G(d)<sup>6</sup> or cc-pVDZ basis sets were used for all the atoms. Frequency calculations at the same level of theory were performed to identify the number of imaginary frequencies (zero for local minimum and one for transition states) and provide the Gibbs free energy and frontier molecular orbitals (HOMO and LUMO). Dispersion correction calculations using the corresponding B3LYP-D functional were performed with the DFT-D3 program of Grimme.<sup>7</sup> Transition states were located by using the quadratic synchronous transit (QST3) algorithm developed by Schlegel et al.<sup>8</sup> The connection of all transition states with the related ground states was verified by following the intrinsic reaction coordinate (IRC).<sup>9</sup> Gibbs free reaction energies and enthalpies were calculated for standard conditions ( $p = 1$  atm,  $T = 298$  K) and are unscaled. Nucleus independent chemical shift was computed at the M06-2X/6-311++G(2d,p)//M06-2X/6-31G(d) level of theory in the gas-phase. When the environments at points 1 angstrom above and below the ring centers are not equivalent, the averaged values are used for NICS(1). Optimized structures were visualized using the CYLview program.<sup>10</sup>

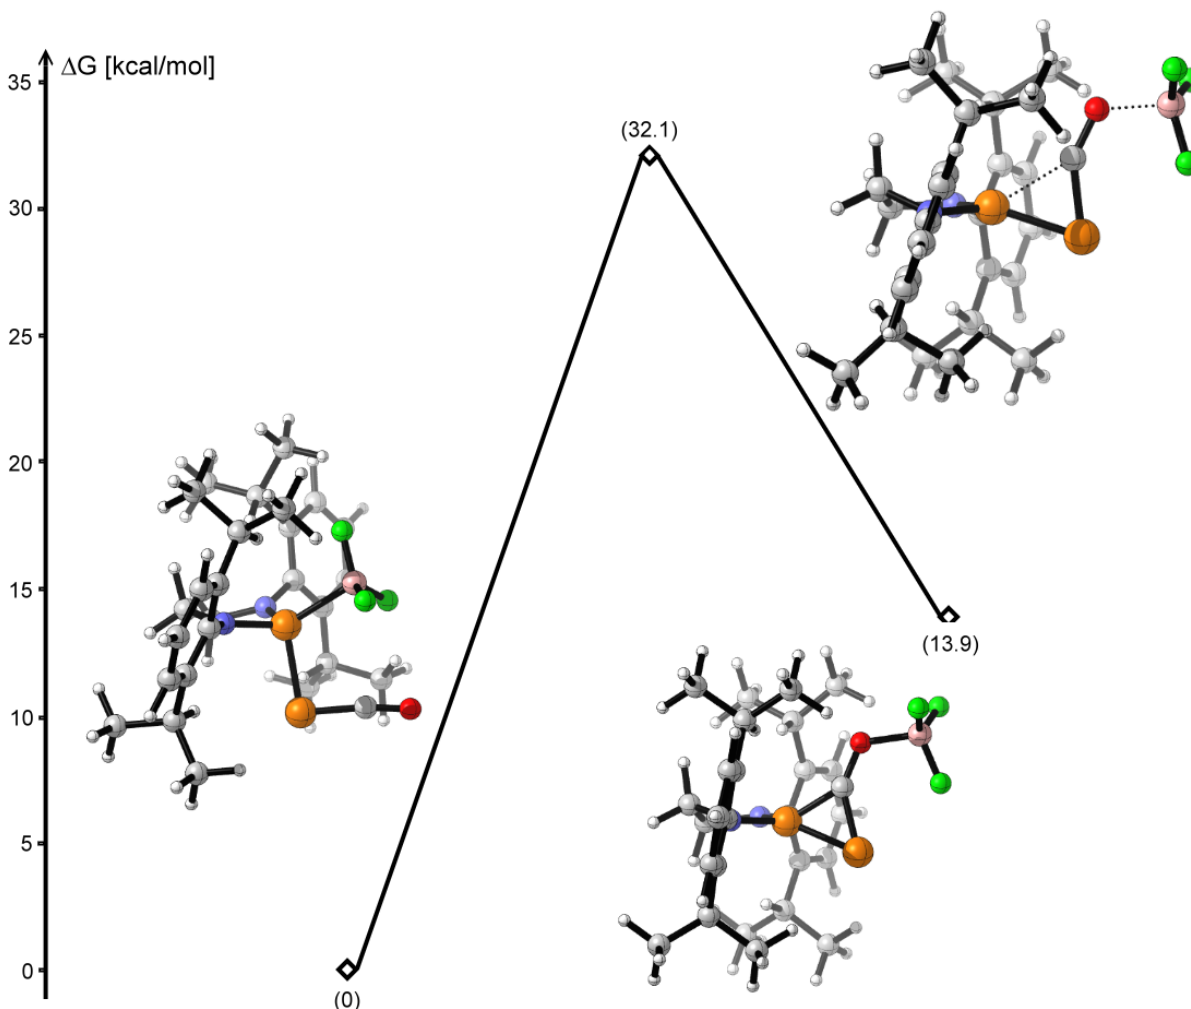

Figure S1. Energy profile for the  $\text{BF}_3$  assisted cyclization calculated at the B3LYP-D3BJ/cc-pVDZ level of theory.

Comment to Figure S1: Even though the activation barrier of Lewis-acid activation is fairly high ( $\Delta G^\ddagger = 32.1$  kcal/mol) it should be pointed out that the in reference (starting) molecule  $\text{BF}_3$  is coordinated to the inner phosphorus of the [P]-PCO molecule. As this reaction also only proceeds when employing a bulky Lewis acidic borane such as  $\text{B}(\text{C}_6\text{F}_5)_3$ , in which this coordination is inhibited based on sterics, it seems reasonable to assume that the energies of transition state and product will significantly decrease.

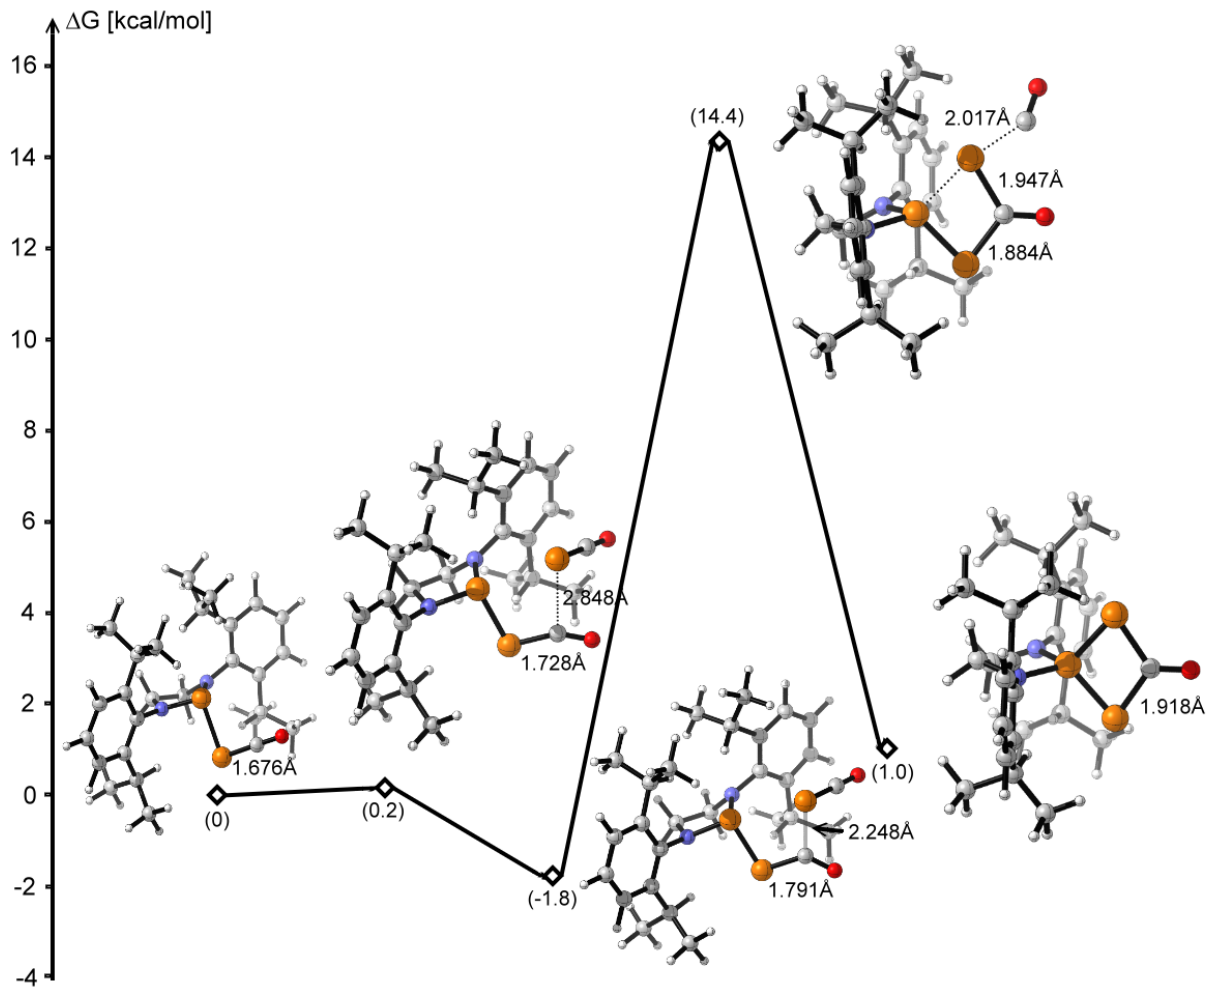

Figure S2. Energy profile for the PCO- addition to [P]-PCO calculated at the B3LYP-D3BJ/cc-pVDZ level of theory.

Comment to Figure S2: The reaction pathway shows a low lying transition state ( $\Delta G^\ddagger = 16.2$  kcal/mol) for the attack of the endocyclic phosphorus onto the P-atom releasing CO in agreement with our recent proposed P-CO substitution approach. Even though the reaction is predicted to be slightly endergonic, the calculations do not take into account the sodium cation as well as any solvent effects. As the latter play a crucial role in solubilizing NaPCO and therefore increasing its reactivity, the relative stability of starting materials and products might strongly vary. However, the point of this calculation is to rationalize the observed reactivity and to give an energetically reasonable mechanism for the formation of the 4-membered “P<sup>-</sup>” insertion product.

Optimized coordinates:

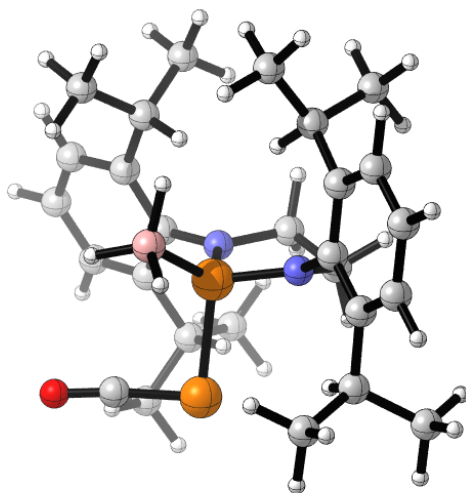

|                                              |                             |
|----------------------------------------------|-----------------------------|
| Zero-point correction=                       | 0.630854 (Hartree/Particle) |
| Thermal correction to Energy=                | 0.667177                    |
| Thermal correction to Enthalpy=              | 0.668121                    |
| Thermal correction to Gibbs Free Energy=     | 0.564066                    |
| Sum of electronic and zero-point Energies=   | -1945.948439                |
| Sum of electronic and thermal Energies=      | -1945.912117                |
| Sum of electronic and thermal Enthalpies=    | -1945.911172                |
| Sum of electronic and thermal Free Energies= | -1946.015227                |

|   |           |           |           |   |           |           |           |
|---|-----------|-----------|-----------|---|-----------|-----------|-----------|
| C | 3.006612  | 1.512458  | -0.203310 | C | -2.452121 | 0.344663  | -0.239196 |
| C | 2.686193  | 0.142326  | -0.246610 | C | -2.832661 | 1.567634  | 0.345642  |
| C | 3.668671  | -0.841649 | -0.063796 | C | -4.181482 | 1.778067  | 0.622279  |
| C | 4.978156  | -0.433642 | 0.184299  | C | -5.134609 | 0.821662  | 0.314590  |
| C | 5.309146  | 0.909574  | 0.234743  | C | -4.751512 | -0.361321 | -0.294544 |
| C | 4.330331  | 1.870906  | 0.036808  | C | -3.414332 | -0.623118 | -0.585447 |
| N | 1.337120  | -0.250924 | -0.525854 | C | -1.839290 | 2.683589  | 0.602990  |
| C | 0.837125  | -0.337082 | -1.901330 | C | -1.953802 | 3.755577  | -0.490538 |
| C | -0.550598 | 0.307422  | -1.885593 | C | -3.057407 | -1.906447 | -1.310403 |
| N | -1.069096 | 0.107976  | -0.526523 | C | -3.637257 | -3.149176 | -0.627415 |
| P | 0.093093  | -0.402060 | 0.573006  | P | -0.126564 | -2.657783 | 0.782798  |
| B | 0.317841  | 0.402439  | 2.282028  | C | -1.238432 | -2.522005 | 2.016319  |
| C | 3.346258  | -2.320216 | -0.121926 | O | -2.017961 | -2.525876 | 2.867901  |
| C | 3.500437  | -2.973666 | 1.255742  | C | -3.511509 | -1.847986 | -2.776871 |
| C | 1.971833  | 2.592669  | -0.450980 | C | -1.976629 | 3.301015  | 1.995902  |
| C | 2.007350  | 3.701256  | 0.604457  | C | 4.179613  | -3.048459 | -1.182325 |



|   |           |           |           |   |           |           |           |
|---|-----------|-----------|-----------|---|-----------|-----------|-----------|
| C | 2.118726  | 3.182441  | -1.860663 | H | -2.921986 | 3.834379  | 2.113074  |
| H | -0.492520 | 1.376816  | -2.109346 | H | -1.911307 | 2.535884  | 2.767849  |
| H | -1.206957 | -0.158199 | -2.619269 | H | -1.201323 | 4.533205  | -0.343745 |
| H | 1.520054  | 0.184331  | -2.567672 | H | -1.812057 | 3.327278  | -1.484351 |
| H | 0.776505  | -1.381582 | -2.227581 | H | -2.937100 | 4.230278  | -0.471936 |
| H | -5.502960 | -1.096968 | -0.548120 | H | 1.330054  | 3.912810  | -2.053060 |
| H | -6.177723 | 1.002255  | 0.541136  | H | 3.080862  | 3.686501  | -1.972000 |
| H | -4.489483 | 2.709024  | 1.078531  | H | 2.062061  | 2.410395  | -2.629515 |
| H | 4.599016  | 2.917989  | 0.074997  | H | 1.178620  | 4.393578  | 0.445365  |
| H | 6.331168  | 1.209501  | 0.428347  | H | 1.917407  | 3.286586  | 1.607321  |
| H | 5.747352  | -1.178735 | 0.338617  | H | 2.931021  | 4.280099  | 0.551676  |
| H | -0.841976 | 2.261055  | 0.543887  | H | 2.301645  | -2.415587 | -0.415646 |
| H | -1.973613 | -2.006705 | -1.292723 | H | 3.196581  | -4.021415 | 1.217614  |
| H | 0.991452  | 2.127327  | -0.390564 | H | 4.538641  | -2.933740 | 1.592130  |
| H | -3.244797 | -4.052925 | -1.096900 | H | 2.883534  | -2.469052 | 1.999127  |
| H | -3.382734 | -3.177882 | 0.430451  | H | 3.871166  | -4.093438 | -1.251944 |
| H | -4.725104 | -3.179237 | -0.711402 | H | 4.056964  | -2.589410 | -2.164947 |
| H | -3.184200 | -2.740135 | -3.315030 | H | 5.243179  | -3.033105 | -0.937566 |
| H | -4.600055 | -1.795633 | -2.844119 | H | 0.571851  | 1.560541  | 2.100200  |
| H | -3.111533 | -0.972803 | -3.291035 | H | -0.734456 | 0.200551  | 2.835954  |
| H | -1.171057 | 4.017615  | 2.164695  | H | 1.221328  | -0.247296 | 2.746763  |

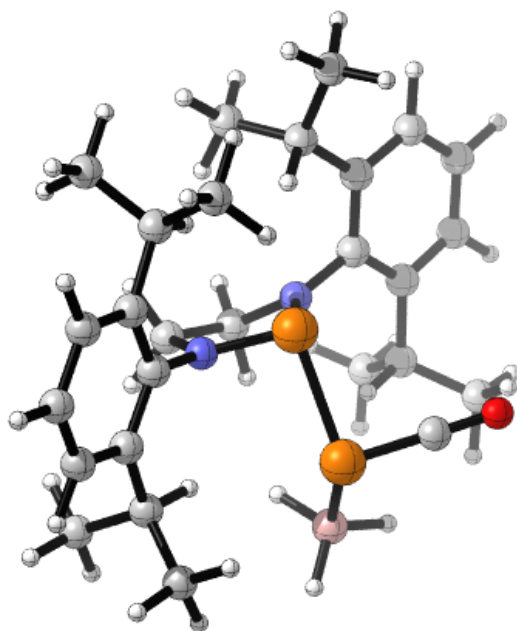

|                                              |                             |
|----------------------------------------------|-----------------------------|
| Zero-point correction=                       | 0.630117 (Hartree/Particle) |
| Thermal correction to Energy=                | 0.667906                    |
| Thermal correction to Enthalpy=              | 0.668850                    |
| Thermal correction to Gibbs Free Energy=     | 0.560231                    |
| Sum of electronic and zero-point Energies=   | -1945.928067                |
| Sum of electronic and thermal Energies=      | -1945.890278                |
| Sum of electronic and thermal Enthalpies=    | -1945.889334                |
| Sum of electronic and thermal Free Energies= | -1945.997953                |

|   |           |           |           |   |           |           |           |
|---|-----------|-----------|-----------|---|-----------|-----------|-----------|
| C | -3.056588 | 1.552192  | 0.213596  | C | -2.579036 | 3.878224  | -0.648710 |
| C | -2.645717 | 0.254649  | -0.146481 | C | 2.053251  | 4.112634  | 0.868816  |
| C | -3.570645 | -0.802160 | -0.228716 | C | 3.976452  | -2.860379 | 0.366798  |
| C | -4.902159 | -0.541174 | 0.088001  | H | -0.998068 | 1.044878  | -2.270732 |
| C | -5.312637 | 0.722126  | 0.480753  | H | -1.386765 | -0.672013 | -2.459648 |
| C | -4.395300 | 1.758370  | 0.538372  | H | 1.215996  | 0.232920  | -2.604144 |
| N | -1.270741 | 0.013130  | -0.461674 | H | 0.803729  | -1.375438 | -1.989546 |
| P | -0.033961 | 0.028447  | 0.680056  | H | -5.626253 | -1.342962 | 0.033159  |
| P | -0.290890 | -2.308199 | 1.369443  | H | -6.349693 | 0.901135  | 0.734541  |
| C | 1.024418  | -2.225124 | 2.402567  | H | -4.725565 | 2.746493  | 0.830814  |
| O | 1.894892  | -2.136818 | 3.152546  | H | 4.387012  | 3.234817  | 0.328427  |
| C | -3.171158 | -2.193389 | -0.677215 | H | 6.183935  | 1.572044  | 0.149717  |
| C | -3.716196 | -2.494237 | -2.080479 | H | 5.642676  | -0.787652 | -0.284091 |
| C | -2.097602 | 2.726301  | 0.240945  | H | -1.150212 | 2.386362  | -0.171618 |
| C | -1.836458 | 3.208053  | 1.672772  | H | -2.085066 | -2.230328 | -0.738581 |
| C | -0.825441 | 0.044252  | -1.859538 | H | 0.828229  | 2.445176  | 0.452768  |
| C | 0.660219  | -0.305828 | -1.837686 | H | -3.208156 | -4.241153 | 0.015252  |
| N | 1.139182  | 0.106721  | -0.508310 | H | -3.258477 | -3.057188 | 1.320897  |
| C | 2.505094  | 0.482729  | -0.286494 | H | -4.701757 | -3.361099 | 0.350099  |
| C | 3.524129  | -0.480350 | -0.365179 | H | -3.356433 | -3.465142 | -2.425391 |
| C | 4.845971  | -0.059336 | -0.217871 | H | -4.807979 | -2.517847 | -2.077548 |
| C | 5.152613  | 1.265926  | 0.028811  | H | -3.405790 | -1.737738 | -2.803187 |
| C | 4.135121  | 2.203304  | 0.129444  | H | -1.114916 | 4.027286  | 1.676685  |
| C | 2.801790  | 1.839167  | -0.031547 | H | -2.756518 | 3.568766  | 2.136664  |
| C | 3.234657  | -1.946097 | -0.614342 | H | -1.440055 | 2.403426  | 2.292512  |
| C | 3.565843  | -2.341688 | -2.059924 | H | -1.832605 | 4.674605  | -0.670734 |
| C | 1.712488  | 2.897152  | 0.005844  | H | -2.749066 | 3.541010  | -1.672288 |
| C | 1.344216  | 3.337246  | -1.417421 | H | -3.510510 | 4.310388  | -0.279633 |
| C | -3.614200 | -3.274762 | 0.313556  | H | 0.533146  | 4.067555  | -1.399247 |

|   |          |           |           |   |           |           |           |
|---|----------|-----------|-----------|---|-----------|-----------|-----------|
| H | 2.205376 | 3.796775  | -1.906757 | H | 3.815979  | -2.551373 | 1.399110  |
| H | 1.025847 | 2.493051  | -2.027515 | H | 3.277382  | -3.378481 | -2.240313 |
| H | 1.178497 | 4.759524  | 0.951654  | H | 3.045013  | -1.712750 | -2.782649 |
| H | 2.352772 | 3.817201  | 1.875053  | H | 4.637232  | -2.246960 | -2.250666 |
| H | 2.856158 | 4.711294  | 0.435307  | B | 0.161229  | -3.838663 | 0.026949  |
| H | 2.171635 | -2.111609 | -0.460072 | H | 1.268377  | -4.224978 | 0.269903  |
| H | 3.615675 | -3.883242 | 0.258225  | H | -0.723413 | -4.614641 | 0.268454  |
| H | 5.051897 | -2.863640 | 0.179629  | H | 0.040394  | -3.260099 | -1.024253 |

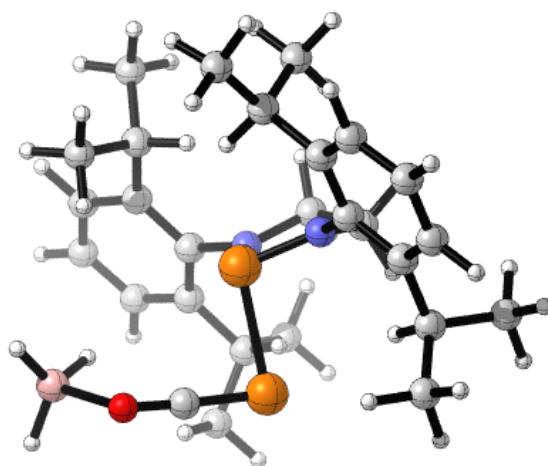

|                                              |                             |
|----------------------------------------------|-----------------------------|
| Zero-point correction=                       | 0.629296 (Hartree/Particle) |
| Thermal correction to Energy=                | 0.667888                    |
| Thermal correction to Enthalpy=              | 0.668832                    |
| Thermal correction to Gibbs Free Energy=     | 0.555479                    |
| Sum of electronic and zero-point Energies=   | -1945.910639                |
| Sum of electronic and thermal Energies=      | -1945.872047                |
| Sum of electronic and thermal Enthalpies=    | -1945.871103                |
| Sum of electronic and thermal Free Energies= | -1945.984457                |

|   |           |           |           |   |           |           |           |
|---|-----------|-----------|-----------|---|-----------|-----------|-----------|
| C | -2.781846 | 1.611192  | -0.223848 | P | 0.101472  | -0.040623 | 0.517266  |
| C | -2.396134 | 0.302858  | -0.565321 | P | -0.022428 | -2.424144 | 1.194683  |
| C | -3.348742 | -0.713684 | -0.748329 | C | -0.726118 | -1.840563 | 2.534759  |
| C | -4.693393 | -0.396986 | -0.577800 | O | -1.232022 | -1.365994 | 3.493622  |
| C | -5.087610 | 0.881471  | -0.219131 | C | -2.956126 | -2.129825 | -1.119236 |
| C | -4.137663 | 1.873555  | -0.043189 | C | -3.383696 | -2.468546 | -2.553862 |
| N | -1.008170 | 0.000370  | -0.741300 | C | -1.776070 | 2.731161  | -0.039020 |

|   |           |           |           |   |           |           |           |
|---|-----------|-----------|-----------|---|-----------|-----------|-----------|
| C | -1.660583 | 3.134788  | 1.436115  | H | 1.202253  | 2.274114  | 0.402809  |
| C | -0.432113 | -0.019589 | -2.089424 | H | -3.127491 | -4.149832 | -0.354840 |
| C | 1.006554  | -0.494000 | -1.913423 | H | -3.236957 | -2.903397 | 0.894207  |
| N | 1.388005  | -0.072932 | -0.561250 | H | -4.605069 | -3.203693 | -0.178143 |
| C | 2.750996  | 0.169112  | -0.198922 | H | -3.037244 | -3.466338 | -2.831390 |
| C | 3.670247  | -0.889858 | -0.158035 | H | -4.471166 | -2.453023 | -2.650832 |
| C | 5.004472  | -0.600519 | 0.127763  | H | -2.981209 | -1.753893 | -3.274133 |
| C | 5.411479  | 0.692679  | 0.399756  | H | -0.876829 | 3.884007  | 1.568121  |
| C | 4.485306  | 1.726272  | 0.391472  | H | -2.598627 | 3.561792  | 1.795829  |
| C | 3.147606  | 1.492771  | 0.088808  | H | -1.427196 | 2.275870  | 2.064827  |
| C | 3.262239  | -2.328589 | -0.409484 | H | -1.311347 | 4.698277  | -0.821753 |
| C | 3.832520  | -2.847245 | -1.735477 | H | -2.158905 | 3.657313  | -1.974237 |
| C | 2.156453  | 2.642698  | 0.026865  | H | -3.039107 | 4.408041  | -0.642663 |
| C | 1.940948  | 3.095602  | -1.423595 | H | 1.183549  | 3.880216  | -1.473098 |
| C | -3.515890 | -3.155087 | -0.127611 | H | 2.869249  | 3.491322  | -1.840970 |
| C | -2.093081 | 3.942495  | -0.922961 | H | 1.614562  | 2.271568  | -2.056542 |
| C | 2.529379  | 3.835050  | 0.908164  | H | 1.709482  | 4.554929  | 0.913899  |
| C | 3.650729  | -3.244209 | 0.756129  | H | 2.717090  | 3.528292  | 1.937766  |
| H | -0.474956 | 0.987167  | -2.519151 | H | 3.414697  | 4.356181  | 0.539218  |
| H | -0.992858 | -0.689900 | -2.741401 | H | 2.177082  | -2.357980 | -0.477774 |
| H | 1.680229  | -0.044689 | -2.642102 | H | 3.272727  | -4.253450 | 0.583119  |
| H | 1.065637  | -1.581669 | -2.022843 | H | 4.733682  | -3.309556 | 0.872863  |
| H | -5.441201 | -1.167779 | -0.708187 | H | 3.228193  | -2.881754 | 1.693363  |
| H | -6.136797 | 1.103984  | -0.072867 | H | 3.486140  | -3.864145 | -1.930408 |
| H | -4.453495 | 2.869350  | 0.238062  | H | 3.531105  | -2.216311 | -2.573150 |
| H | 4.814469  | 2.729718  | 0.619247  | H | 4.923868  | -2.863776 | -1.710913 |
| H | 6.449068  | 0.898863  | 0.629222  | B | -2.923429 | -0.610089 | 3.487578  |
| H | 5.728163  | -1.404429 | 0.151384  | H | -3.515606 | -1.446607 | 4.102798  |
| H | -0.804102 | 2.358143  | -0.357117 | H | -2.662513 | 0.410746  | 4.051815  |
| H | -1.869636 | -2.193098 | -1.066676 | H | -3.109321 | -0.554772 | 2.307396  |

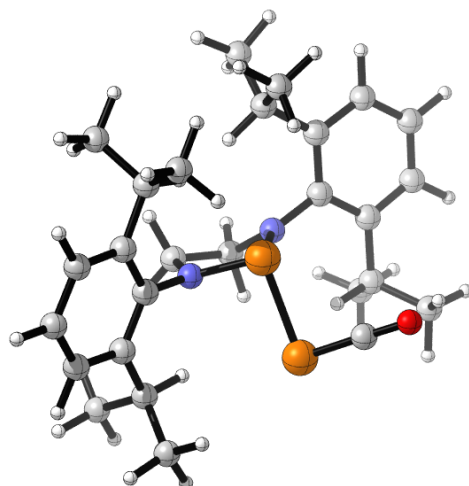

|                                              |                             |
|----------------------------------------------|-----------------------------|
| Zero-point correction=                       | 0.596557 (Hartree/Particle) |
| Thermal correction to Energy=                | 0.631237                    |
| Thermal correction to Enthalpy=              | 0.632181                    |
| Thermal correction to Gibbs Free Energy=     | 0.530102                    |
| Sum of electronic and zero-point Energies=   | -1918.870809                |
| Sum of electronic and thermal Energies=      | -1918.836130                |
| Sum of electronic and thermal Enthalpies=    | -1918.835186                |
| Sum of electronic and thermal Free Energies= | -1918.937265                |

|   |           |           |           |   |           |           |           |
|---|-----------|-----------|-----------|---|-----------|-----------|-----------|
| C | 3.515427  | -0.726089 | -0.319907 | C | 3.139279  | -2.192791 | -0.452964 |
| C | 2.545097  | 0.298734  | -0.386966 | C | 3.707241  | -3.046168 | 0.689815  |
| C | 2.913952  | 1.661889  | -0.290618 | C | -2.641701 | 0.186327  | -0.187211 |
| C | 4.265914  | 1.974436  | -0.099177 | C | -3.584552 | -0.851770 | -0.378317 |
| C | 5.232611  | 0.973240  | -0.030122 | C | -4.931557 | -0.594436 | -0.095637 |
| C | 4.857789  | -0.363407 | -0.148494 | C | -5.341925 | 0.651183  | 0.375420  |
| N | 1.163430  | -0.023734 | -0.580396 | C | -4.405063 | 1.665093  | 0.560449  |
| C | 0.632846  | -0.463625 | -1.874313 | C | -3.048313 | 1.459913  | 0.275838  |
| C | -0.806737 | 0.043238  | -1.889438 | C | -3.174521 | -2.222000 | -0.896718 |
| N | -1.269875 | -0.063512 | -0.501003 | C | -3.603727 | -3.348695 | 0.054311  |
| P | -0.001481 | -0.090802 | 0.680959  | C | -2.069361 | 2.609015  | 0.469925  |
| P | -0.227710 | -2.417977 | 1.232795  | C | -2.430945 | 3.817499  | -0.407345 |
| C | 0.751954  | -2.213795 | 2.577526  | C | -1.963603 | 3.001315  | 1.951267  |
| O | 1.436793  | -2.088636 | 3.516140  | C | -3.721872 | -2.463279 | -2.313509 |
| C | 1.887779  | 2.781258  | -0.381307 | C | 2.278496  | 3.850360  | -1.412041 |
| C | 1.635551  | 3.406608  | 0.999374  | C | 3.568952  | -2.743319 | -1.822528 |

|   |           |           |           |   |           |           |           |
|---|-----------|-----------|-----------|---|-----------|-----------|-----------|
| H | -0.853304 | 1.095806  | -2.230866 | H | -1.238023 | 3.818304  | 2.086881  |
| H | -1.439297 | -0.560686 | -2.558009 | H | -2.935347 | 3.343405  | 2.343086  |
| H | 1.233099  | -0.032810 | -2.687903 | H | -1.633935 | 2.146330  | 2.561097  |
| H | 0.656890  | -1.566428 | -1.965332 | H | -1.665643 | 4.604923  | -0.309554 |
| H | -5.670004 | -1.385393 | -0.239751 | H | -2.497012 | 3.531990  | -1.469071 |
| H | -6.395661 | 0.832398  | 0.598198  | H | -3.399410 | 4.256121  | -0.116878 |
| H | -4.733418 | 2.640217  | 0.925644  | H | 1.467607  | 4.589047  | -1.519799 |
| H | 4.567131  | 3.019752  | -0.010602 | H | 3.185627  | 4.399556  | -1.111929 |
| H | 6.282756  | 1.236297  | 0.114336  | H | 2.469003  | 3.402519  | -2.400036 |
| H | 5.619791  | -1.143109 | -0.097584 | H | 0.877302  | 4.203542  | 0.932559  |
| H | -1.077228 | 2.265628  | 0.148445  | H | 1.278088  | 2.651901  | 1.716163  |
| H | -2.076539 | -2.234540 | -0.950229 | H | 2.559620  | 3.850278  | 1.405187  |
| H | 0.945507  | 2.330451  | -0.721581 | H | 2.046169  | -2.261106 | -0.383624 |
| H | -3.218900 | -4.317423 | -0.303126 | H | 3.315630  | -4.073727 | 0.624173  |
| H | -3.212581 | -3.180489 | 1.068376  | H | 4.807234  | -3.106568 | 0.648850  |
| H | -4.701325 | -3.428531 | 0.116515  | H | 3.426182  | -2.637876 | 1.671596  |
| H | -3.364247 | -3.427521 | -2.710092 | H | 3.250554  | -3.792429 | -1.936852 |
| H | -4.824111 | -2.487826 | -2.312798 | H | 3.128639  | -2.159488 | -2.646371 |
| H | -3.411281 | -1.668013 | -3.009662 | H | 4.665016  | -2.707407 | -1.938959 |

Transition state for the interconversion of **1<sup>Dipp</sup>** to **1\***

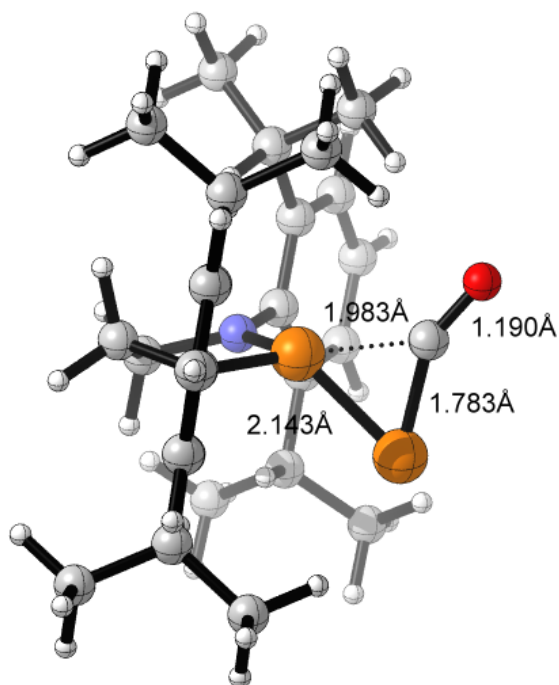

Imaginary frequency

-111 (Int. 24)

|                                              |           |           |           |                             |           |           |           |
|----------------------------------------------|-----------|-----------|-----------|-----------------------------|-----------|-----------|-----------|
| Zero-point correction=                       |           |           |           | 0.596209 (Hartree/Particle) |           |           |           |
| Thermal correction to Energy=                |           |           |           | 0.630878                    |           |           |           |
| Thermal correction to Enthalpy=              |           |           |           | 0.631822                    |           |           |           |
| Thermal correction to Gibbs Free Energy=     |           |           |           | 0.528844                    |           |           |           |
| Sum of electronic and zero-point Energies=   |           |           |           | -1918.835491                |           |           |           |
| Sum of electronic and thermal Energies=      |           |           |           | -1918.800822                |           |           |           |
| Sum of electronic and thermal Enthalpies=    |           |           |           | -1918.799878                |           |           |           |
| Sum of electronic and thermal Free Energies= |           |           |           | -1918.902856                |           |           |           |
| C                                            | 3.408644  | -1.183593 | -0.161594 | C                           | -3.799469 | -3.033307 | -1.744184 |
| C                                            | 2.606252  | -0.045685 | -0.395639 | C                           | 2.876173  | 3.447709  | -1.585932 |
| C                                            | 3.141640  | 1.261208  | -0.325052 | C                           | 3.304471  | -3.310255 | -1.503665 |
| C                                            | 4.500974  | 1.404390  | -0.019077 | H                           | -0.763596 | 1.020218  | -2.318372 |
| C                                            | 5.309034  | 0.289404  | 0.197929  | H                           | -1.351442 | -0.610131 | -2.758161 |
| C                                            | 4.766745  | -0.992503 | 0.123505  | H                           | 1.319396  | -0.083202 | -2.789812 |
| N                                            | 1.217985  | -0.200371 | -0.689906 | H                           | 0.731519  | -1.658318 | -2.178021 |
| C                                            | 0.706695  | -0.564098 | -2.012839 | H                           | -5.605562 | -1.494523 | 0.102551  |
| C                                            | -0.735614 | -0.049788 | -2.037230 | H                           | -6.306426 | 0.852215  | 0.490724  |
| N                                            | -1.247577 | -0.276080 | -0.682457 | H                           | -4.646290 | 2.685615  | 0.359914  |
| P                                            | -0.002940 | -0.155927 | 0.518309  | H                           | 4.934029  | 2.403978  | 0.050340  |
| P                                            | -0.084108 | -1.527301 | 2.163459  | H                           | 6.367957  | 0.420758  | 0.431137  |
| C                                            | 0.074333  | 0.223302  | 2.462888  | H                           | 5.406600  | -1.858825 | 0.301077  |
| O                                            | 0.160003  | 1.155929  | 3.197371  | H                           | -1.001855 | 2.138758  | -0.411353 |
| C                                            | 2.274298  | 2.491526  | -0.546200 | H                           | -2.037421 | -2.440439 | -0.669609 |
| C                                            | 1.998110  | 3.216488  | 0.781383  | H                           | 1.310170  | 2.140739  | -0.939974 |
| C                                            | 2.832023  | -2.589481 | -0.230211 | H                           | -3.032349 | -4.340992 | 0.582731  |
| C                                            | 3.154594  | -3.411132 | 1.025435  | H                           | -2.873135 | -2.902844 | 1.627843  |
| C                                            | -2.604175 | 0.053964  | -0.358430 | H                           | -4.466665 | -3.365180 | 0.977558  |
| C                                            | -3.537348 | -1.002046 | -0.269999 | H                           | -3.446331 | -4.060569 | -1.931715 |
| C                                            | -4.869171 | -0.691544 | 0.033174  | H                           | -4.895249 | -3.072416 | -1.626603 |
| C                                            | -5.264503 | 0.626452  | 0.253281  | H                           | -3.582861 | -2.426573 | -2.638048 |
| C                                            | -4.328998 | 1.657122  | 0.177540  | H                           | -1.156158 | 4.111846  | 1.066272  |
| C                                            | -2.986708 | 1.395285  | -0.126332 | H                           | -2.856078 | 3.737438  | 1.435294  |
| C                                            | -3.122347 | -2.447336 | -0.495538 | H                           | -1.560132 | 2.622971  | 1.948487  |
| C                                            | -3.390100 | -3.311093 | 0.745664  | H                           | -1.589968 | 4.306913  | -1.430577 |
| C                                            | -1.997384 | 2.551646  | -0.197809 | H                           | -2.406320 | 2.983337  | -2.308816 |
| C                                            | -2.349528 | 3.512817  | -1.344411 | H                           | -3.324371 | 3.998203  | -1.173989 |
| C                                            | -1.890383 | 3.294160  | 1.142924  | H                           | 2.178434  | 4.276005  | -1.789927 |

|   |          |           |           |   |          |           |           |
|---|----------|-----------|-----------|---|----------|-----------|-----------|
| H | 3.820442 | 3.893873  | -1.233516 | H | 2.656994 | -4.393249 | 0.976794  |
| H | 3.083412 | 2.930096  | -2.535931 | H | 4.236711 | -3.593673 | 1.126494  |
| H | 1.345175 | 4.088810  | 0.614017  | H | 2.806117 | -2.895620 | 1.932718  |
| H | 1.505929 | 2.559979  | 1.513748  | H | 2.843904 | -4.308697 | -1.581620 |
| H | 2.936972 | 3.580207  | 1.231233  | H | 3.044235 | -2.738427 | -2.408372 |
| H | 1.738328 | -2.491680 | -0.283091 | H | 4.399161 | -3.442133 | -1.497853 |

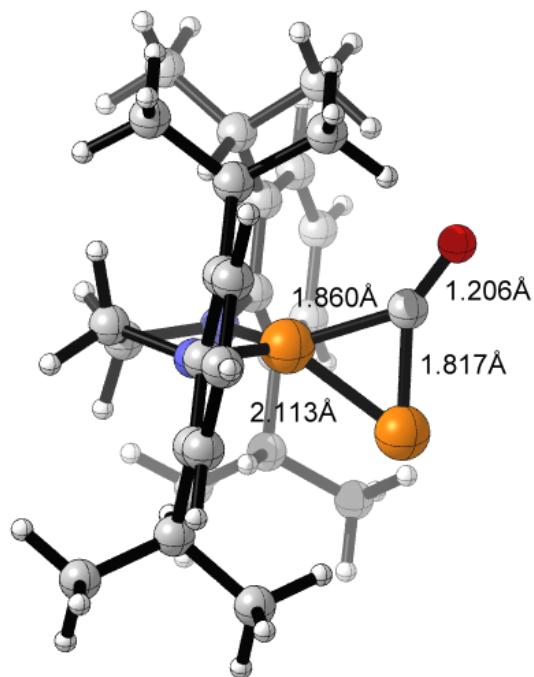

|                                              |                             |
|----------------------------------------------|-----------------------------|
| Zero-point correction=                       | 0.596991 (Hartree/Particle) |
| Thermal correction to Energy=                | 0.631289                    |
| Thermal correction to Enthalpy=              | 0.632234                    |
| Thermal correction to Gibbs Free Energy=     | 0.531270                    |
| Sum of electronic and zero-point Energies=   | -1918.835217                |
| Sum of electronic and thermal Energies=      | -1918.800920                |
| Sum of electronic and thermal Enthalpies=    | -1918.799975                |
| Sum of electronic and thermal Free Energies= | -1918.900939                |

|   |           |           |           |   |           |           |           |
|---|-----------|-----------|-----------|---|-----------|-----------|-----------|
| C | -2.994431 | 1.340047  | -0.025592 | C | -4.337584 | 1.568031  | 0.300424  |
| C | -2.600517 | 0.017119  | -0.333761 | N | -1.240262 | -0.275647 | -0.680285 |
| C | -3.519873 | -1.053493 | -0.299712 | P | -0.002603 | -0.281316 | 0.514946  |
| C | -4.852073 | -0.776101 | 0.032833  | C | 0.117705  | 0.355604  | 2.258640  |
| C | -5.259769 | 0.522981  | 0.328492  | O | 0.256558  | 1.345618  | 2.932568  |



|   |           |           |           |   |           |           |           |
|---|-----------|-----------|-----------|---|-----------|-----------|-----------|
| C | -3.092185 | -2.479905 | -0.607801 | H | 5.475178  | -1.711553 | 0.395562  |
| C | -3.830114 | -3.034652 | -1.835976 | H | -1.007819 | 2.113780  | -0.203952 |
| C | -2.022003 | 2.512641  | -0.061448 | H | -2.019621 | -2.447572 | -0.844619 |
| C | -2.004405 | 3.301196  | 1.256297  | H | 1.168714  | 2.047531  | -0.912148 |
| C | -0.725522 | 0.031110  | -2.019275 | H | -2.911702 | -4.411142 | 0.391489  |
| C | 0.713521  | -0.499485 | -2.033694 | H | -2.709046 | -3.009892 | 1.479650  |
| N | 1.222135  | -0.301280 | -0.674693 | H | -4.331605 | -3.469581 | 0.907717  |
| C | 2.599209  | -0.060299 | -0.380379 | H | -3.465526 | -4.045099 | -2.082870 |
| C | 3.452789  | -1.150220 | -0.108805 | H | -4.915567 | -3.106683 | -1.656498 |
| C | 4.796385  | -0.883272 | 0.184254  | H | -3.680620 | -2.390036 | -2.716941 |
| C | 5.275202  | 0.425378  | 0.218306  | H | -1.264083 | 4.114574  | 1.195844  |
| C | 4.416978  | 1.492143  | -0.045149 | H | -2.984660 | 3.757901  | 1.467996  |
| C | 3.067911  | 1.273105  | -0.350716 | H | -1.722311 | 2.660680  | 2.102776  |
| C | 2.946906  | -2.583773 | -0.143043 | H | -1.577965 | 4.240643  | -1.322436 |
| C | 3.540491  | -3.345703 | -1.338987 | H | -2.327311 | 2.880758  | -2.205515 |
| C | 2.151487  | 2.453753  | -0.636820 | H | -3.318739 | 3.905073  | -1.144685 |
| C | 2.653624  | 3.280793  | -1.830376 | H | 1.937437  | 4.083828  | -2.068969 |
| P | -0.134205 | -1.444231 | 2.274485  | H | 3.624765  | 3.755177  | -1.614252 |
| C | 1.949166  | 3.329282  | 0.610118  | H | 2.781077  | 2.654546  | -2.728031 |
| C | 3.214380  | -3.316670 | 1.179003  | H | 1.265887  | 4.163870  | 0.380748  |
| C | -3.271541 | -3.393248 | 0.614263  | H | 1.517814  | 2.756397  | 1.444157  |
| C | -2.327439 | 3.435270  | -1.253721 | H | 2.904147  | 3.763910  | 0.949110  |
| H | -0.743758 | 1.116579  | -2.227351 | H | 1.856994  | -2.541574 | -0.280177 |
| H | -1.349059 | -0.473099 | -2.773444 | H | 2.782740  | -4.330263 | 1.149279  |
| H | 1.337511  | 0.059564  | -2.746304 | H | 4.294064  | -3.420560 | 1.375245  |
| H | 0.736047  | -1.568778 | -2.317449 | H | 2.761913  | -2.776107 | 2.023781  |
| H | -5.578569 | -1.590317 | 0.064798  | H | 3.133366  | -4.368773 | -1.389703 |
| H | -6.301829 | 0.722925  | 0.587402  | H | 3.313291  | -2.836748 | -2.289370 |
| H | -4.666169 | 2.580701  | 0.540329  | H | 4.637336  | -3.423402 | -1.256950 |
| H | 4.800125  | 2.513786  | -0.010602 |   |           |           |           |
| H | 6.324306  | 0.615918  | 0.454970  |   |           |           |           |

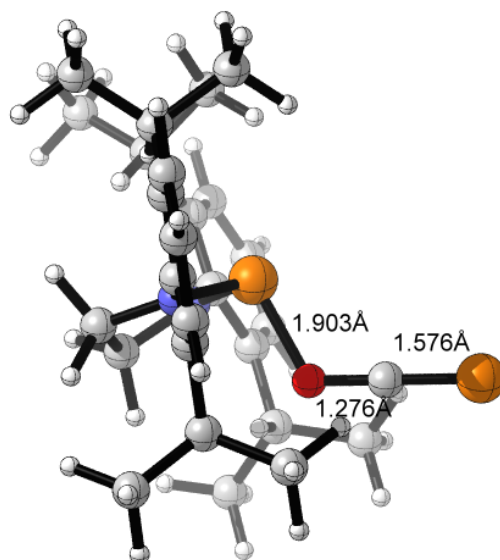

|                                              |                             |
|----------------------------------------------|-----------------------------|
| Zero-point correction=                       | 0.597124 (Hartree/Particle) |
| Thermal correction to Energy=                | 0.631581                    |
| Thermal correction to Enthalpy=              | 0.632525                    |
| Thermal correction to Gibbs Free Energy=     | 0.531045                    |
| Sum of electronic and zero-point Energies=   | -1918.846021                |
| Sum of electronic and thermal Energies=      | -1918.811564                |
| Sum of electronic and thermal Enthalpies=    | -1918.810620                |
| Sum of electronic and thermal Free Energies= | -1918.912100                |

|   |           |           |           |   |           |           |           |
|---|-----------|-----------|-----------|---|-----------|-----------|-----------|
| C | -2.989885 | 1.639268  | 0.215151  | N | 1.242115  | 0.143207  | -0.620303 |
| C | -2.556965 | 0.404766  | -0.318731 | C | 2.639715  | 0.281072  | -0.318344 |
| C | -3.463336 | -0.646779 | -0.578345 | C | 3.478183  | -0.852668 | -0.287751 |
| C | -4.819483 | -0.434827 | -0.298557 | C | 4.835158  | -0.660821 | 0.009297  |
| C | -5.263799 | 0.775974  | 0.229298  | C | 5.342976  | 0.609933  | 0.266248  |
| C | -4.354758 | 1.800353  | 0.487326  | C | 4.502245  | 1.721717  | 0.218628  |
| N | -1.169775 | 0.215418  | -0.629093 | C | 3.142240  | 1.581956  | -0.082056 |
| P | 0.026774  | -0.082985 | 0.536288  | C | 2.960084  | -2.253903 | -0.573977 |
| O | -0.097182 | -1.981662 | 0.529969  | C | 3.588670  | -2.820066 | -1.857468 |
| C | -3.004009 | -1.982897 | -1.141640 | C | 2.232292  | 2.801803  | -0.115413 |
| C | -3.590513 | -2.225113 | -2.541581 | C | 2.867391  | 4.004183  | -0.826391 |
| C | -2.020254 | 2.768496  | 0.533000  | C | 1.785867  | 3.178468  | 1.307244  |
| C | -1.882662 | 2.949969  | 2.053328  | C | 3.180688  | -3.193851 | 0.620774  |
| C | -0.680085 | 0.488538  | -1.989056 | C | -3.340081 | -3.139723 | -0.188210 |
| C | 0.773143  | 0.012009  | -2.010403 | C | -2.414259 | 4.083856  | -0.154410 |

|   |           |           |           |   |           |           |           |
|---|-----------|-----------|-----------|---|-----------|-----------|-----------|
| H | -0.754781 | 1.571962  | -2.199398 | H | -2.849333 | 3.223478  | 2.506686  |
| H | -1.290473 | -0.046672 | -2.732093 | H | -1.537285 | 2.020806  | 2.532227  |
| H | 1.400266  | 0.632670  | -2.666100 | H | -1.651194 | 4.856790  | 0.032936  |
| H | 0.845432  | -1.036216 | -2.351173 | H | -2.510755 | 3.952105  | -1.243635 |
| H | -5.536594 | -1.235372 | -0.489225 | H | -3.374966 | 4.470398  | 0.222781  |
| H | -6.324409 | 0.920715  | 0.446086  | H | 2.129013  | 4.815289  | -0.930729 |
| H | -4.710702 | 2.742040  | 0.909411  | H | 3.720788  | 4.412759  | -0.261850 |
| H | 4.911475  | 2.713148  | 0.417704  | H | 3.226371  | 3.734006  | -1.831748 |
| H | 6.401678  | 0.737376  | 0.502401  | H | 1.102399  | 4.042839  | 1.285845  |
| H | 5.501718  | -1.524357 | 0.044015  | H | 1.265701  | 2.343146  | 1.800421  |
| H | -1.032510 | 2.483581  | 0.143257  | H | 2.655949  | 3.444916  | 1.929554  |
| H | -1.910637 | -1.947090 | -1.226498 | H | 1.877214  | -2.190013 | -0.728635 |
| H | 1.330915  | 2.522533  | -0.680470 | H | 2.736017  | -4.180398 | 0.416186  |
| H | -2.937713 | -4.086626 | -0.582535 | H | 4.253641  | -3.342702 | 0.826743  |
| H | -2.901712 | -2.978151 | 0.807434  | H | 2.705964  | -2.800700 | 1.531704  |
| H | -4.429598 | -3.262040 | -0.069760 | H | 3.166387  | -3.811758 | -2.086814 |
| H | -3.201601 | -3.164856 | -2.966157 | H | 3.403715  | -2.159605 | -2.720065 |
| H | -4.689853 | -2.303083 | -2.508439 | H | 4.680326  | -2.936158 | -1.755536 |
| H | -3.338551 | -1.404945 | -3.233431 | C | -0.220419 | -2.594258 | 1.642005  |
| H | -1.159463 | 3.746829  | 2.287871  | P | -0.378149 | -3.344912 | 3.018863  |

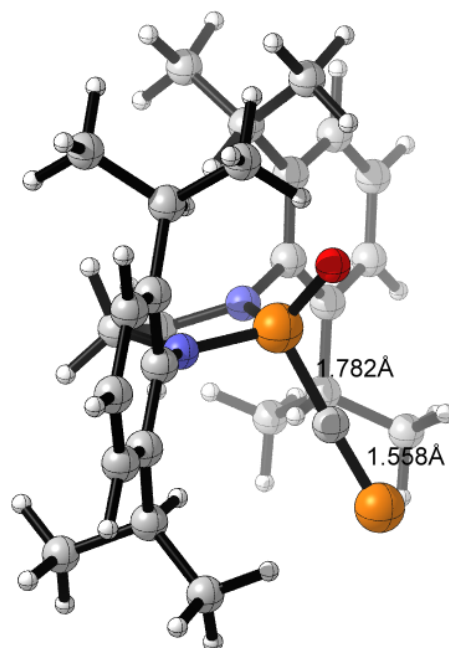

Zero-point correction=

0.597811 (Hartree/Particle)

|                                              |              |
|----------------------------------------------|--------------|
| Thermal correction to Energy=                | 0.631867     |
| Thermal correction to Enthalpy=              | 0.632811     |
| Thermal correction to Gibbs Free Energy=     | 0.533273     |
| Sum of electronic and zero-point Energies=   | -1918.851156 |
| Sum of electronic and thermal Energies=      | -1918.817101 |
| Sum of electronic and thermal Enthalpies=    | -1918.816156 |
| Sum of electronic and thermal Free Energies= | -1918.915694 |

|   |           |           |           |   |           |           |           |
|---|-----------|-----------|-----------|---|-----------|-----------|-----------|
| C | -3.509926 | -0.877995 | -0.285042 | C | -2.414573 | 3.742942  | -0.844963 |
| C | -2.592976 | 0.194563  | -0.203994 | C | -3.542302 | -2.594468 | -2.125452 |
| C | -3.013137 | 1.499082  | 0.141109  | H | 0.769016  | -1.384196 | -2.149353 |
| C | -4.372687 | 1.702826  | 0.414422  | H | 1.365605  | 0.244116  | -2.577954 |
| C | -5.288338 | 0.655520  | 0.343226  | H | -1.321605 | -0.321493 | -2.606239 |
| C | -4.858612 | -0.623134 | -0.007399 | H | -0.736405 | 1.286144  | -2.092053 |
| N | -1.215070 | -0.059778 | -0.513046 | H | 4.749307  | 2.767913  | 0.276600  |
| C | -0.704355 | 0.204589  | -1.863146 | H | 6.360737  | 0.896979  | 0.479971  |
| C | 0.738850  | -0.314888 | -1.868447 | H | 5.591582  | -1.444983 | 0.211063  |
| N | 1.239045  | -0.105567 | -0.508083 | H | -5.582422 | -1.438033 | -0.065291 |
| P | 0.014374  | -0.153906 | 0.656893  | H | -6.343260 | 0.836763  | 0.560868  |
| O | 0.092561  | 0.824852  | 1.798626  | H | -4.718127 | 2.701519  | 0.687618  |
| C | -0.087600 | -1.809137 | 1.308847  | H | 1.980132  | -2.356335 | -0.343974 |
| P | -0.156694 | -3.239723 | 1.921434  | H | 1.105955  | 2.268004  | -0.517203 |
| C | -2.055804 | 2.680567  | 0.206217  | H | -1.971715 | -2.281592 | -0.693586 |
| C | -1.993938 | 3.277799  | 1.619128  | H | 1.216045  | 4.271263  | 0.945663  |
| C | -3.069538 | -2.274080 | -0.697263 | H | 1.521826  | 2.761091  | 1.844601  |
| C | -3.544040 | -3.349631 | 0.289649  | H | 2.881335  | 3.852652  | 1.419644  |
| C | 2.619216  | 0.160265  | -0.233366 | H | 1.778251  | 4.411027  | -1.532813 |
| C | 3.526729  | -0.915404 | -0.125099 | H | 3.490679  | 4.093504  | -1.175308 |
| C | 4.873764  | -0.626958 | 0.126998  | H | 2.627501  | 3.065323  | -2.342021 |
| C | 5.308024  | 0.689112  | 0.275950  | H | 3.068232  | -4.255363 | 0.762824  |
| C | 4.400123  | 1.740068  | 0.161805  | H | 4.581330  | -3.343003 | 0.957305  |
| C | 3.044876  | 1.501458  | -0.102337 | H | 3.115400  | -2.826565 | 1.828965  |
| C | 3.077239  | -2.356751 | -0.304708 | H | 3.228708  | -3.955322 | -1.788346 |
| C | 3.597671  | -2.928011 | -1.633885 | H | 3.270534  | -2.313139 | -2.487391 |
| C | 2.089414  | 2.676078  | -0.250952 | H | 4.699773  | -2.958465 | -1.649567 |
| C | 1.921614  | 3.433771  | 1.073966  | H | -3.177132 | -3.584445 | -2.445060 |
| C | 2.523145  | 3.611131  | -1.390302 | H | -4.643359 | -2.604434 | -2.185924 |
| C | 3.486362  | -3.242267 | 0.880205  | H | -3.179032 | -1.845519 | -2.846997 |

|   |           |           |           |   |           |          |           |
|---|-----------|-----------|-----------|---|-----------|----------|-----------|
| H | -3.111062 | -4.328117 | 0.025472  | H | -2.975126 | 3.666009 | 1.938936  |
| H | -3.238639 | -3.105648 | 1.318031  | H | -1.653791 | 2.517182 | 2.334477  |
| H | -4.640750 | -3.460841 | 0.278510  | H | -1.674381 | 4.559610 | -0.831738 |
| H | -1.047526 | 2.315008  | -0.020843 | H | -2.435307 | 3.313962 | -1.859953 |
| H | -1.276037 | 4.113333  | 1.645637  | H | -3.404999 | 4.186828 | -0.651583 |

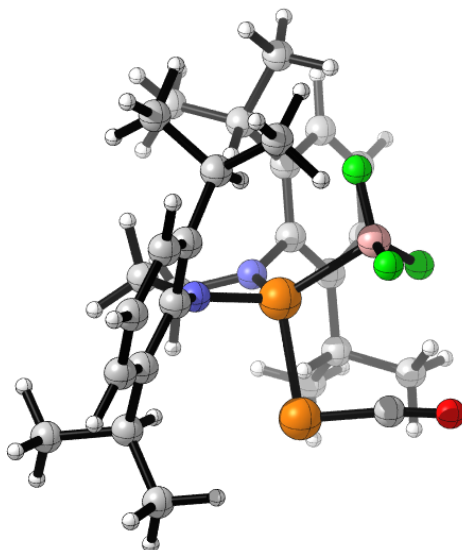

|                                              |                             |
|----------------------------------------------|-----------------------------|
| Zero-point correction=                       | 0.610813 (Hartree/Particle) |
| Thermal correction to Energy=                | 0.650702                    |
| Thermal correction to Enthalpy=              | 0.651647                    |
| Thermal correction to Gibbs Free Energy=     | 0.538591                    |
| Sum of electronic and zero-point Energies=   | -2243.449295                |
| Sum of electronic and thermal Energies=      | -2243.409406                |
| Sum of electronic and thermal Enthalpies=    | -2243.408462                |
| Sum of electronic and thermal Free Energies= | -2243.521517                |

|   |           |           |           |   |           |           |           |
|---|-----------|-----------|-----------|---|-----------|-----------|-----------|
| C | 2.845955  | 1.583771  | -0.724749 | N | -1.299545 | 0.004905  | -0.729657 |
| C | 2.514892  | 0.207340  | -0.703843 | P | -0.017874 | -0.432986 | 0.320164  |
| C | 3.502197  | -0.787282 | -0.554818 | B | 0.567476  | 0.427617  | 2.215585  |
| C | 4.837671  | -0.383906 | -0.424031 | C | 3.153536  | -2.265128 | -0.514876 |
| C | 5.183874  | 0.964079  | -0.450353 | C | 3.453010  | -2.858373 | 0.870640  |
| C | 4.195307  | 1.935476  | -0.600529 | C | 1.797050  | 2.670136  | -0.913164 |
| N | 1.143109  | -0.179265 | -0.887552 | C | 1.991363  | 3.860482  | 0.035851  |
| C | 0.537266  | -0.299170 | -2.220389 | C | -2.662551 | 0.220094  | -0.338338 |
| C | -0.844022 | 0.341674  | -2.089304 | C | -3.015494 | 1.405977  | 0.347442  |

|   |           |           |           |   |           |           |           |
|---|-----------|-----------|-----------|---|-----------|-----------|-----------|
| C | -4.358420 | 1.593199  | 0.699260  | H | -3.444809 | -4.164376 | -1.335778 |
| C | -5.328081 | 0.648496  | 0.371731  | H | -3.406068 | -3.337204 | 0.243337  |
| C | -4.969036 | -0.504176 | -0.323118 | H | -4.889108 | -3.313026 | -0.745793 |
| C | -3.638259 | -0.742320 | -0.688559 | H | -3.541731 | -2.787725 | -3.502701 |
| C | -2.004026 | 2.501260  | 0.647443  | H | -4.950600 | -1.873449 | -2.909150 |
| C | -2.154489 | 3.655800  | -0.358277 | H | -3.493848 | -1.004375 | -3.432653 |
| C | -3.296522 | -1.995813 | -1.479654 | H | -1.254380 | 3.704560  | 2.288953  |
| C | -3.788677 | -3.273767 | -0.785525 | H | -3.026637 | 3.544698  | 2.287761  |
| P | -0.469154 | -2.661965 | 0.564850  | H | -1.998651 | 2.175656  | 2.804795  |
| C | 0.174392  | -2.778575 | 2.128320  | H | -1.386845 | 4.425715  | -0.177676 |
| O | 0.563914  | -2.983188 | 3.199057  | H | -2.048605 | 3.302612  | -1.396553 |
| C | -3.848850 | -1.908504 | -2.913163 | H | -3.144101 | 4.133565  | -0.268456 |
| C | -2.083720 | 3.008227  | 2.093003  | H | 0.960962  | 3.896409  | -2.516718 |
| C | 3.858771  | -3.050645 | -1.630009 | H | 2.718318  | 3.626309  | -2.651771 |
| C | 1.762231  | 3.152878  | -2.373871 | H | 1.588825  | 2.326168  | -3.079672 |
| H | -0.789339 | 1.436667  | -2.220568 | H | 1.133497  | 4.547253  | -0.046882 |
| H | -1.548131 | -0.062991 | -2.830326 | H | 2.062821  | 3.524519  | 1.077770  |
| H | 1.168818  | 0.211147  | -2.957307 | H | 2.895047  | 4.439965  | -0.213416 |
| H | 0.451414  | -1.362854 | -2.514682 | H | 2.071697  | -2.355282 | -0.681410 |
| H | -5.735376 | -1.235629 | -0.585078 | H | 3.088986  | -3.896712 | 0.932874  |
| H | -6.369921 | 0.813958  | 0.654447  | H | 4.537046  | -2.867688 | 1.072735  |
| H | -4.648626 | 2.499983  | 1.231698  | H | 2.970410  | -2.269283 | 1.662704  |
| H | 4.477103  | 2.989105  | -0.614847 | H | 3.542383  | -4.106219 | -1.613512 |
| H | 6.229652  | 1.262224  | -0.349020 | H | 3.621506  | -2.636408 | -2.623050 |
| H | 5.615579  | -1.139031 | -0.298825 | H | 4.954615  | -3.030261 | -1.512103 |
| H | -0.998761 | 2.088553  | 0.512934  | F | 0.824413  | 1.754958  | 1.977039  |
| H | -2.200385 | -2.054129 | -1.545931 | F | -0.498008 | 0.171515  | 3.037544  |
| H | 0.820141  | 2.227225  | -0.682438 | F | 1.687667  | -0.339230 | 2.459689  |

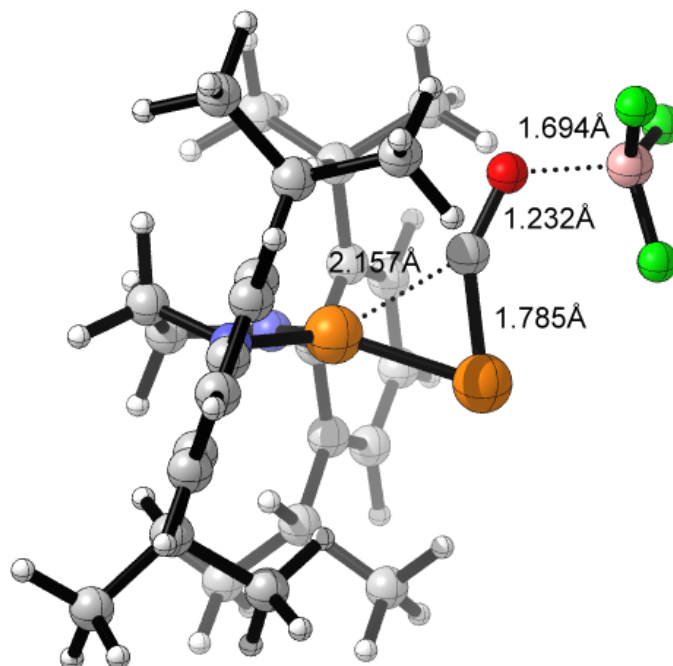

|                                              |                             |
|----------------------------------------------|-----------------------------|
| Imaginary frequency                          | -21 (Int. 5.6)              |
| Zero-point correction=                       | 0.609867 (Hartree/Particle) |
| Thermal correction to Energy=                | 0.649058                    |
| Thermal correction to Enthalpy=              | 0.650002                    |
| Thermal correction to Gibbs Free Energy=     | 0.535296                    |
| Sum of electronic and zero-point Energies=   | -2243.395846                |
| Sum of electronic and thermal Energies=      | -2243.356655                |
| Sum of electronic and thermal Enthalpies=    | -2243.355711                |
| Sum of electronic and thermal Free Energies= | -2243.470417                |

|   |           |           |           |   |           |           |           |
|---|-----------|-----------|-----------|---|-----------|-----------|-----------|
| C | 3.309599  | 0.913374  | 0.747311  | C | 2.467269  | 2.045784  | 1.316579  |
| C | 2.796723  | -0.378152 | 0.515636  | C | 2.442163  | 3.257368  | 0.370163  |
| C | 3.587867  | -1.412635 | -0.037350 | C | 1.037625  | -1.196352 | 2.163549  |
| C | 4.923190  | -1.130037 | -0.339554 | C | -0.337819 | -1.851545 | 1.960672  |
| C | 5.452752  | 0.141885  | -0.111309 | N | -1.000909 | -1.073799 | 0.907917  |
| C | 4.653836  | 1.149549  | 0.419855  | C | -2.360610 | -1.287214 | 0.513011  |
| N | 1.436266  | -0.705245 | 0.834049  | C | -2.660586 | -2.338448 | -0.380453 |
| P | 0.077800  | -0.133274 | 0.006632  | C | -4.000231 | -2.539059 | -0.734339 |
| C | -0.456664 | 1.827581  | -0.717192 | C | -5.003337 | -1.709591 | -0.234287 |
| O | -0.783699 | 2.978936  | -0.425948 | C | -4.682650 | -0.656307 | 0.620436  |
| C | 2.974885  | -2.772917 | -0.346415 | C | -3.357401 | -0.418871 | 1.008045  |
| C | 3.970305  | -3.934274 | -0.246870 | C | -1.574392 | -3.221289 | -0.978554 |

|   |           |           |           |   |           |           |           |
|---|-----------|-----------|-----------|---|-----------|-----------|-----------|
| C | -1.747761 | -4.691424 | -0.567490 | H | 4.728079  | -3.895095 | -1.045623 |
| C | -3.026126 | 0.731213  | 1.947832  | H | 4.496115  | -3.935922 | 0.720516  |
| C | -3.498423 | 0.409452  | 3.375996  | H | 1.707953  | 4.002952  | 0.707451  |
| P | -0.103093 | 0.653731  | -2.014815 | H | 3.428704  | 3.746242  | 0.320242  |
| C | -3.597835 | 2.071618  | 1.462018  | H | 2.162685  | 2.960041  | -0.650887 |
| C | -1.515356 | -3.070405 | -2.506623 | H | 2.305201  | 3.235386  | 3.136153  |
| C | 2.306162  | -2.749857 | -1.732503 | H | 2.919347  | 1.580842  | 3.412569  |
| C | 2.945655  | 2.440057  | 2.722886  | H | 3.980613  | 2.818758  | 2.701047  |
| H | 0.982534  | -0.368107 | 2.893715  | H | -3.211968 | 1.215425  | 4.070850  |
| H | 1.782442  | -1.922640 | 2.517039  | H | -4.595272 | 0.303670  | 3.415439  |
| H | -0.934889 | -1.817972 | 2.884132  | H | -3.061312 | -0.533488 | 3.743159  |
| H | -0.227664 | -2.907745 | 1.653315  | H | -3.282355 | 2.880931  | 2.139155  |
| H | 5.558347  | -1.906283 | -0.766494 | H | -3.244553 | 2.330234  | 0.453964  |
| H | 6.496830  | 0.347202  | -0.356901 | H | -4.699907 | 2.063040  | 1.450176  |
| H | 5.075010  | 2.142722  | 0.582591  | H | -0.606524 | -2.881999 | -0.582893 |
| H | -5.473977 | -0.002128 | 0.989310  | H | -0.683334 | -3.662303 | -2.920504 |
| H | -6.042795 | -1.877839 | -0.523788 | H | -2.446556 | -3.420735 | -2.980384 |
| H | -4.260691 | -3.346970 | -1.420688 | H | -1.368471 | -2.018601 | -2.796844 |
| H | 1.432486  | 1.688097  | 1.412603  | H | -0.921148 | -5.304032 | -0.962583 |
| H | 2.180644  | -2.954351 | 0.393363  | H | -1.766216 | -4.801274 | 0.528452  |
| H | -1.932004 | 0.829819  | 1.973350  | H | -2.689578 | -5.108503 | -0.959345 |
| H | 1.807927  | -3.710420 | -1.942144 | B | -1.037375 | 4.107358  | -1.663583 |
| H | 1.552274  | -1.952542 | -1.805845 | F | -2.348132 | 4.444917  | -1.493435 |
| H | 3.054811  | -2.570431 | -2.520973 | F | -0.120456 | 5.075906  | -1.373430 |
| H | 3.440503  | -4.894046 | -0.352028 | F | -0.770075 | 3.384645  | -2.813410 |



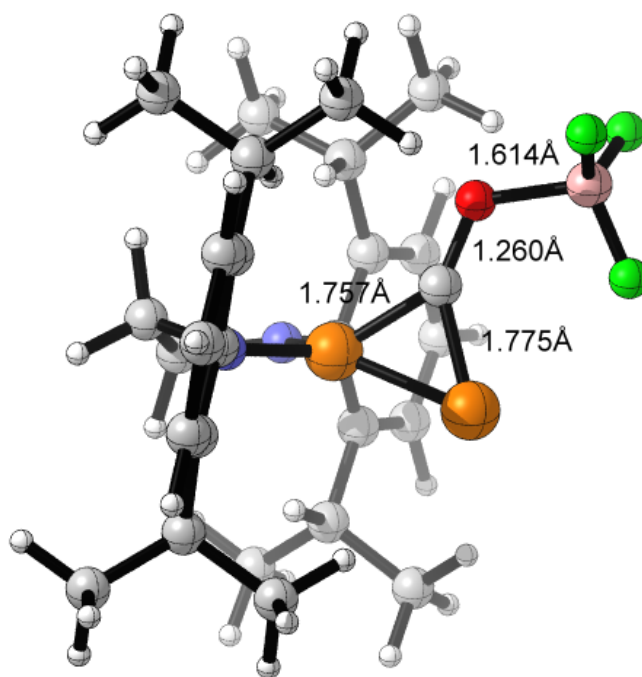

|                                              |                             |
|----------------------------------------------|-----------------------------|
| Zero-point correction=                       | 0.612077 (Hartree/Particle) |
| Thermal correction to Energy=                | 0.650407                    |
| Thermal correction to Enthalpy=              | 0.651351                    |
| Thermal correction to Gibbs Free Energy=     | 0.540263                    |
| Sum of electronic and zero-point Energies=   | -2243.427608                |
| Sum of electronic and thermal Energies=      | -2243.389278                |
| Sum of electronic and thermal Enthalpies=    | -2243.388334                |
| Sum of electronic and thermal Free Energies= | -2243.499422                |

|   |           |           |           |   |           |           |           |
|---|-----------|-----------|-----------|---|-----------|-----------|-----------|
| C | 3.196414  | -0.818194 | -0.808836 | C | 3.871844  | 3.979414  | -0.134632 |
| C | 2.710280  | 0.477850  | -0.526885 | C | 2.336635  | -1.889050 | -1.467089 |
| C | 3.524755  | 1.470417  | 0.060406  | C | 2.406272  | -3.241245 | -0.743382 |
| C | 4.852098  | 1.141359  | 0.361421  | C | 0.884471  | 1.183091  | -2.162519 |
| C | 5.352873  | -0.129828 | 0.085230  | C | -0.540200 | 1.723078  | -1.977059 |
| C | 4.533258  | -1.096518 | -0.494068 | N | -1.112624 | 0.936768  | -0.878903 |
| N | 1.344325  | 0.815689  | -0.813373 | C | -2.515035 | 0.846767  | -0.597552 |
| P | 0.060731  | 0.345842  | 0.179064  | C | -3.149871 | 1.887554  | 0.111661  |
| C | -0.174428 | -1.193213 | 0.994287  | C | -4.523729 | 1.773992  | 0.359309  |
| O | -0.373450 | -2.421636 | 0.795757  | C | -5.233978 | 0.651467  | -0.062128 |
| C | 2.979682  | 2.849934  | 0.399304  | C | -4.581591 | -0.383390 | -0.731062 |

|   |           |           |           |   |           |           |           |
|---|-----------|-----------|-----------|---|-----------|-----------|-----------|
| C | -3.210958 | -0.312526 | -1.010136 | H | 3.402581  | 4.958422  | 0.053480  |
| C | -2.382189 | 3.102605  | 0.611311  | H | 4.857888  | 3.988890  | 0.357121  |
| C | -2.811229 | 4.376221  | -0.134434 | H | 4.038862  | 3.880091  | -1.218716 |
| C | -2.518859 | -1.437119 | -1.768314 | H | 1.704002  | -3.949678 | -1.208777 |
| C | -2.748388 | -1.270533 | -3.280964 | H | 3.413908  | -3.682546 | -0.810428 |
| P | 0.024425  | 0.014773  | 2.279139  | H | 2.129133  | -3.163557 | 0.315616  |
| C | -2.937232 | -2.835191 | -1.294776 | H | 2.062614  | -2.766719 | -3.449328 |
| C | -2.514553 | 3.271086  | 2.132320  | H | 2.652062  | -1.080237 | -3.488032 |
| C | 2.757686  | 2.986274  | 1.914758  | H | 3.759541  | -2.397804 | -3.048542 |
| C | 2.722029  | -2.038937 | -2.949826 | H | -2.208953 | -2.049618 | -3.843685 |
| H | 0.885863  | 0.308808  | -2.836545 | H | -3.820172 | -1.354470 | -3.526268 |
| H | 1.556585  | 1.947589  | -2.578038 | H | -2.403333 | -0.286941 | -3.639065 |
| H | -1.142764 | 1.577894  | -2.884513 | H | -2.344172 | -3.596372 | -1.825688 |
| H | -0.526622 | 2.801987  | -1.736764 | H | -2.761056 | -2.974865 | -0.219544 |
| H | 5.500670  | 1.887314  | 0.823733  | H | -3.998304 | -3.040491 | -1.511176 |
| H | 6.389822  | -0.371095 | 0.328374  | H | -1.316089 | 2.935748  | 0.398055  |
| H | 4.934731  | -2.089500 | -0.699781 | H | -1.891552 | 4.110232  | 2.481645  |
| H | -5.145422 | -1.265012 | -1.037029 | H | -3.554634 | 3.482847  | 2.427659  |
| H | -6.303666 | 0.575511  | 0.144071  | H | -2.194465 | 2.359585  | 2.659959  |
| H | -5.041776 | 2.568260  | 0.899661  | H | -2.215285 | 5.242104  | 0.196819  |
| H | 1.288155  | -1.558606 | -1.430183 | H | -2.683705 | 4.264670  | -1.222934 |
| H | 1.998055  | 2.941729  | -0.087557 | H | -3.872661 | 4.606391  | 0.053339  |
| H | -1.438938 | -1.344625 | -1.589397 | B | -0.519545 | -3.424328 | 2.051463  |
| H | 2.316675  | 3.966636  | 2.158565  | F | -1.711024 | -4.072586 | 1.822914  |
| H | 2.084446  | 2.201045  | 2.291877  | F | 0.598435  | -4.225332 | 1.979370  |
| H | 3.710361  | 2.896241  | 2.462022  | F | -0.537702 | -2.609164 | 3.183432  |

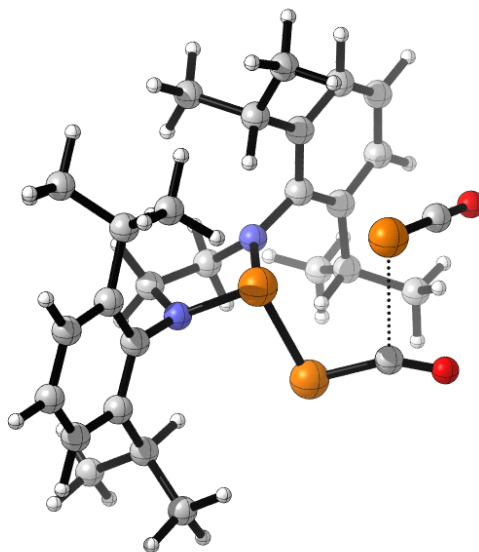

|                                              |           |           |           |                             |           |           |           |
|----------------------------------------------|-----------|-----------|-----------|-----------------------------|-----------|-----------|-----------|
| Imaginary frequency                          |           |           |           | -75.6 (Int. 38)             |           |           |           |
| Zero-point correction=                       |           |           |           | 0.604889 (Hartree/Particle) |           |           |           |
| Thermal correction to Energy=                |           |           |           | 0.643536                    |           |           |           |
| Thermal correction to Enthalpy=              |           |           |           | 0.644481                    |           |           |           |
| Thermal correction to Gibbs Free Energy=     |           |           |           | 0.534144                    |           |           |           |
| Sum of electronic and zero-point Energies=   |           |           |           | -2373.630527                |           |           |           |
| Sum of electronic and thermal Energies=      |           |           |           | -2373.591880                |           |           |           |
| Sum of electronic and thermal Enthalpies=    |           |           |           | -2373.590936                |           |           |           |
| Sum of electronic and thermal Free Energies= |           |           |           | -2373.701272                |           |           |           |
| C                                            | -3.350448 | 1.447065  | 0.185786  | C                           | -1.342374 | -0.006208 | -2.026240 |
| C                                            | -3.001032 | 0.126465  | -0.190497 | C                           | 0.125869  | -0.400531 | -2.117647 |
| C                                            | -3.969193 | -0.906371 | -0.142579 | N                           | 0.739705  | 0.134929  | -0.903714 |
| C                                            | -5.265047 | -0.606469 | 0.296145  | C                           | 2.140690  | 0.421006  | -0.886436 |
| C                                            | -5.607390 | 0.685275  | 0.692317  | C                           | 3.099162  | -0.567011 | -1.203283 |
| C                                            | -4.653426 | 1.699845  | 0.635933  | C                           | 4.442647  | -0.185135 | -1.331151 |
| N                                            | -1.684501 | -0.195442 | -0.624107 | C                           | 4.847158  | 1.121860  | -1.093038 |
| P                                            | -0.290080 | -0.078667 | 0.512312  | C                           | 3.903700  | 2.073846  | -0.704589 |
| P                                            | -0.242262 | -2.303694 | 0.984266  | C                           | 2.550335  | 1.746735  | -0.596942 |
| C                                            | 1.044915  | -2.351643 | 2.136200  | C                           | 2.735107  | -2.036182 | -1.365811 |
| O                                            | 1.781802  | -2.948206 | 2.828783  | C                           | 2.848515  | -2.489000 | -2.830731 |
| C                                            | -3.621213 | -2.323112 | -0.569995 | C                           | 1.527042  | 2.803649  | -0.211708 |
| C                                            | -4.377746 | -2.717086 | -1.848346 | C                           | 0.933245  | 3.450357  | -1.472584 |
| C                                            | -2.351647 | 2.592600  | 0.106259  | C                           | 2.072905  | 3.859693  | 0.753431  |
| C                                            | -1.944780 | 3.087648  | 1.502237  | C                           | 3.579015  | -2.940761 | -0.453584 |

|   |           |           |           |   |           |           |           |
|---|-----------|-----------|-----------|---|-----------|-----------|-----------|
| C | -3.861921 | -3.337598 | 0.555859  | H | -2.815638 | 3.478950  | 2.055502  |
| C | -2.881743 | 3.744219  | -0.761507 | H | -1.494851 | 2.272583  | 2.087401  |
| H | -1.486919 | 1.047619  | -2.346841 | H | -2.114724 | 4.528236  | -0.868522 |
| H | -1.965258 | -0.643760 | -2.681359 | H | -3.153514 | 3.390772  | -1.769105 |
| H | 0.618942  | 0.030981  | -3.001872 | H | -3.775651 | 4.213505  | -0.317323 |
| H | 0.199104  | -1.502773 | -2.180047 | H | 0.164569  | 4.196487  | -1.210406 |
| H | -6.014507 | -1.400556 | 0.336794  | H | 1.719493  | 3.959911  | -2.055560 |
| H | -6.619283 | 0.902480  | 1.044126  | H | 0.467689  | 2.692180  | -2.120758 |
| H | -4.926181 | 2.712160  | 0.943440  | H | 1.253397  | 4.516821  | 1.089520  |
| H | 4.229752  | 3.090289  | -0.480461 | H | 2.510311  | 3.374171  | 1.638591  |
| H | 5.901741  | 1.396084  | -1.176019 | H | 2.834768  | 4.505466  | 0.284073  |
| H | 5.188094  | -0.942931 | -1.580063 | H | 1.696717  | -2.159694 | -1.035070 |
| H | -1.447069 | 2.207849  | -0.380128 | H | 3.187857  | -3.971483 | -0.486311 |
| H | -2.545684 | -2.326320 | -0.793467 | H | 4.634215  | -2.972256 | -0.774689 |
| H | 0.719305  | 2.288083  | 0.324232  | H | 3.558640  | -2.590011 | 0.585999  |
| H | -3.539097 | -4.343664 | 0.240365  | H | 2.546749  | -3.544958 | -2.938333 |
| H | -3.282503 | -3.065417 | 1.450278  | H | 2.214467  | -1.882820 | -3.496844 |
| H | -4.929364 | -3.396609 | 0.830606  | H | 3.888227  | -2.398273 | -3.189876 |
| H | -4.068541 | -3.719079 | -2.190938 | P | 1.759383  | 0.333813  | 2.759492  |
| H | -5.468336 | -2.741553 | -1.679125 | C | 3.230905  | -0.218682 | 2.270250  |
| H | -4.184290 | -2.001111 | -2.663378 | O | 4.291379  | -0.625856 | 1.917444  |
| H | -1.199624 | 3.896102  | 1.422959  |   |           |           |           |

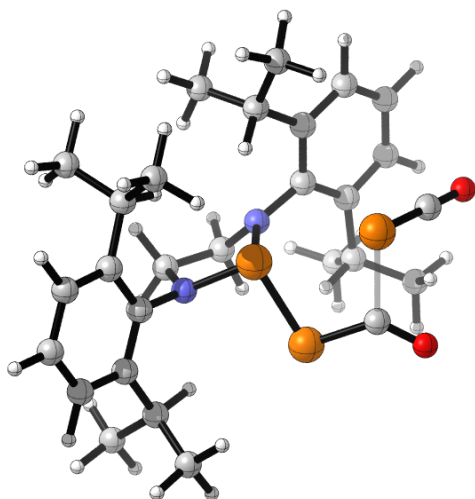

|                                 |                             |
|---------------------------------|-----------------------------|
| Zero-point correction=          | 0.604903 (Hartree/Particle) |
| Thermal correction to Energy=   | 0.644138                    |
| Thermal correction to Enthalpy= | 0.645083                    |

|                                              |              |
|----------------------------------------------|--------------|
| Thermal correction to Gibbs Free Energy=     | 0.532808     |
| Sum of electronic and zero-point Energies=   | -2373.632270 |
| Sum of electronic and thermal Energies=      | -2373.593035 |
| Sum of electronic and thermal Enthalpies=    | -2373.592090 |
| Sum of electronic and thermal Free Energies= | -2373.704365 |

|   |           |           |           |   |           |           |           |
|---|-----------|-----------|-----------|---|-----------|-----------|-----------|
| C | 3.389709  | 1.414793  | -0.220402 | H | 1.560354  | 1.142646  | 2.314599  |
| C | 3.017002  | 0.107472  | 0.178420  | H | 2.005798  | -0.544981 | 2.709498  |
| C | 3.960103  | -0.947783 | 0.126797  | H | -0.545536 | 0.203124  | 3.067361  |
| C | 5.255293  | -0.681391 | -0.336123 | H | -0.191302 | -1.366134 | 2.280377  |
| C | 5.621291  | 0.598006  | -0.750288 | H | 5.985252  | -1.493271 | -0.380737 |
| C | 4.691092  | 1.634607  | -0.691308 | H | 6.632612  | 0.788424  | -1.119119 |
| N | 1.702930  | -0.180229 | 0.642827  | H | 4.981453  | 2.637356  | -1.014263 |
| P | 0.294438  | -0.083926 | -0.466825 | H | -4.181591 | 3.160255  | 0.219385  |
| P | 0.126556  | -2.266665 | -0.878801 | H | -5.879363 | 1.523607  | 0.989961  |
| C | -1.191400 | -2.236373 | -2.091708 | H | -5.181303 | -0.773327 | 1.602410  |
| O | -1.792911 | -3.116566 | -2.637468 | H | 1.498727  | 2.214783  | 0.333886  |
| C | 3.587054  | -2.352845 | 0.570951  | H | 2.519369  | -2.327077 | 0.826988  |
| C | 4.374194  | -2.764508 | 1.824873  | H | -0.651317 | 2.302512  | -0.409255 |
| C | 2.414392  | 2.580638  | -0.145991 | H | 3.433206  | -4.372543 | -0.228940 |
| C | 2.025929  | 3.080448  | -1.545238 | H | 3.143961  | -3.092211 | -1.427137 |
| C | 1.385257  | 0.080169  | 2.040475  | H | 4.814505  | -3.452183 | -0.882907 |
| C | -0.092582 | -0.268774 | 2.181161  | H | 4.046942  | -3.756046 | 2.180873  |
| N | -0.708218 | 0.258787  | 0.967608  | H | 5.457892  | -2.822047 | 1.621621  |
| C | -2.105798 | 0.532521  | 0.907614  | H | 4.227838  | -2.041108 | 2.643473  |
| C | -3.080278 | -0.429612 | 1.263451  | H | 1.298521  | 3.905788  | -1.472682 |
| C | -4.426381 | -0.037652 | 1.317773  | H | 2.906851  | 3.450736  | -2.096919 |
| C | -4.822904 | 1.245603  | 0.963310  | H | 1.562111  | 2.270659  | -2.127004 |
| C | -3.865218 | 2.163887  | 0.530995  | H | 2.214905  | 4.522808  | 0.826259  |
| C | -2.509106 | 1.830756  | 0.498750  | H | 3.223629  | 3.362616  | 1.731874  |
| C | -2.729412 | -1.884498 | 1.545620  | H | 3.871794  | 4.169890  | 0.283178  |
| C | -2.863839 | -2.218375 | 3.040178  | H | -0.116811 | 4.299654  | 1.006853  |
| C | -1.470059 | 2.855994  | 0.069509  | H | -1.692253 | 4.130012  | 1.831204  |
| C | -0.898415 | 3.578215  | 1.298998  | H | -0.453934 | 2.856510  | 2.000785  |
| C | -1.984732 | 3.854405  | -0.971772 | H | -1.151141 | 4.477252  | -1.336293 |
| C | -3.564940 | -2.855555 | 0.697194  | H | -2.420289 | 3.326800  | -1.833971 |
| C | 3.761169  | -3.373630 | -0.561361 | H | -2.745517 | 4.539809  | -0.560503 |
| C | 2.964794  | 3.721664  | 0.722895  | H | -1.690256 | -2.040986 | 1.232720  |

|   |           |           |           |   |           |           |           |
|---|-----------|-----------|-----------|---|-----------|-----------|-----------|
| H | -3.198383 | -3.885063 | 0.843646  | H | -3.907941 | -2.097464 | 3.377652  |
| H | -4.632212 | -2.835253 | 0.975670  | P | -1.783167 | -0.185466 | -2.796495 |
| H | -3.487988 | -2.620573 | -0.371983 | C | -3.343676 | -0.460612 | -2.299361 |
| H | -2.565753 | -3.262441 | 3.236345  | O | -4.454317 | -0.640426 | -1.946435 |
| H | -2.236631 | -1.561054 | 3.662621  |   |           |           |           |

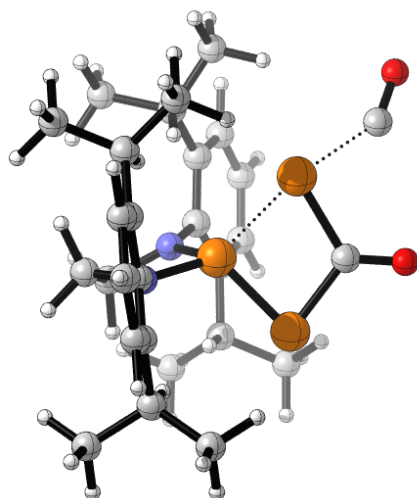

|                                              |                             |
|----------------------------------------------|-----------------------------|
| Imaginary frequency                          | -266 (Int. 4)               |
| Zero-point correction=                       | 0.603328 (Hartree/Particle) |
| Thermal correction to Energy=                | 0.641399                    |
| Thermal correction to Enthalpy=              | 0.642344                    |
| Thermal correction to Gibbs Free Energy=     | 0.531722                    |
| Sum of electronic and zero-point Energies=   | -2373.607042                |
| Sum of electronic and thermal Energies=      | -2373.568970                |
| Sum of electronic and thermal Enthalpies=    | -2373.568026                |
| Sum of electronic and thermal Free Energies= | -2373.678647                |

|   |           |           |           |   |           |           |           |
|---|-----------|-----------|-----------|---|-----------|-----------|-----------|
| C | 3.066302  | -1.436292 | -0.544977 | O | -0.687156 | 0.336883  | 4.130386  |
| C | 2.761886  | -0.055925 | -0.480027 | C | 3.436314  | 2.370091  | -0.042860 |
| C | 3.748535  | 0.883178  | -0.099646 | C | 4.102835  | 3.109408  | -1.214969 |
| C | 5.039249  | 0.423818  | 0.193073  | C | 2.021071  | -2.469988 | -0.941009 |
| C | 5.352840  | -0.932140 | 0.118195  | C | 1.867881  | -3.573664 | 0.114284  |
| C | 4.370956  | -1.851682 | -0.246792 | C | 1.047390  | 0.496513  | -2.199636 |
| N | 1.457528  | 0.419740  | -0.803935 | C | -0.352832 | 1.108293  | -2.164960 |
| P | 0.121780  | 0.277538  | 0.349939  | N | -0.980107 | 0.485207  | -1.009259 |
| P | 0.233947  | 1.710798  | 1.930026  | C | -2.393435 | 0.402614  | -0.874616 |
| C | -0.395555 | 0.257398  | 2.950300  | C | -3.170109 | 1.554808  | -0.626210 |

|   |           |           |           |   |           |           |           |
|---|-----------|-----------|-----------|---|-----------|-----------|-----------|
| C | -4.566023 | 1.427439  | -0.571988 | H | 4.903113  | 2.947100  | 1.492582  |
| C | -5.179808 | 0.187793  | -0.729731 | H | 3.833581  | 4.179437  | -1.204157 |
| C | -4.401324 | -0.951340 | -0.940246 | H | 5.203320  | 3.038220  | -1.160576 |
| C | -3.006901 | -0.867279 | -1.013568 | H | 3.790016  | 2.687316  | -2.183982 |
| C | -2.527965 | 2.920003  | -0.432811 | H | 1.048029  | -4.254947 | -0.168613 |
| C | -2.799757 | 3.829415  | -1.642289 | H | 2.788169  | -4.175056 | 0.209758  |
| C | -2.170123 | -2.107915 | -1.285014 | H | 1.613236  | -3.136734 | 1.090818  |
| C | -2.071402 | -2.366869 | -2.797053 | H | 1.536456  | -3.764870 | -2.632344 |
| C | -2.659769 | -3.349242 | -0.533152 | H | 2.421333  | -2.283590 | -3.092486 |
| C | -2.969078 | 3.581705  | 0.878661  | H | 3.284381  | -3.626783 | -2.307354 |
| C | 3.816548  | 2.996876  | 1.303989  | H | -1.418044 | -3.232212 | -3.003727 |
| C | 2.333215  | -3.067348 | -2.323335 | H | -3.065107 | -2.576317 | -3.229926 |
| H | 1.011693  | -0.497101 | -2.690152 | H | -1.653774 | -1.492915 | -3.321770 |
| H | 1.751261  | 1.131503  | -2.766269 | H | -1.944390 | -4.176595 | -0.672609 |
| H | -0.921955 | 0.875291  | -3.079064 | H | -2.729510 | -3.142100 | 0.544561  |
| H | -0.282134 | 2.213069  | -2.078316 | H | -3.641140 | -3.699449 | -0.897340 |
| H | 5.809558  | 1.140366  | 0.486574  | H | -1.444998 | 2.763991  | -0.347642 |
| H | 6.364347  | -1.274614 | 0.351968  | H | -2.430669 | 4.533334  | 1.021092  |
| H | 4.617856  | -2.914631 | -0.293413 | H | -4.050821 | 3.799754  | 0.888030  |
| H | -4.887523 | -1.922680 | -1.047165 | H | -2.721497 | 2.930331  | 1.728903  |
| H | -6.268544 | 0.104195  | -0.677312 | H | -2.287758 | 4.799696  | -1.525415 |
| H | -5.177807 | 2.313241  | -0.386404 | H | -2.447026 | 3.366235  | -2.578053 |
| H | 1.053640  | -1.954626 | -1.006240 | H | -3.879340 | 4.029119  | -1.756885 |
| H | 2.348831  | 2.465903  | -0.154621 | P | -0.540392 | -1.371780 | 1.894835  |
| H | -1.158731 | -1.890914 | -0.924393 | C | -1.599413 | -2.321439 | 3.325364  |
| H | 3.522862  | 4.059796  | 1.321700  | O | -2.382382 | -3.164642 | 3.485360  |
| H | 3.284235  | 2.487994  | 2.120769  |   |           |           |           |

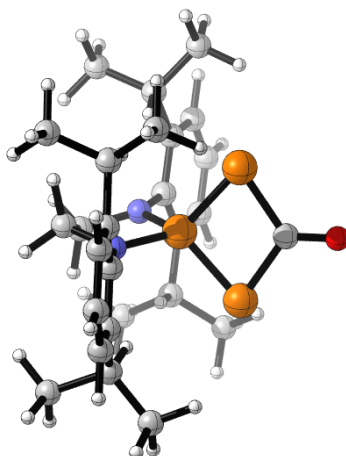

|                                              |                             |
|----------------------------------------------|-----------------------------|
| Zero-point correction=                       | 0.597573 (Hartree/Particle) |
| Thermal correction to Energy=                | 0.632873                    |
| Thermal correction to Enthalpy=              | 0.633817                    |
| Thermal correction to Gibbs Free Energy=     | 0.532029                    |
| Sum of electronic and zero-point Energies=   | -2260.298135                |
| Sum of electronic and thermal Energies=      | -2260.262836                |
| Sum of electronic and thermal Enthalpies=    | -2260.261892                |
| Sum of electronic and thermal Free Energies= | -2260.363680                |

|   |           |           |           |   |           |           |           |
|---|-----------|-----------|-----------|---|-----------|-----------|-----------|
| C | 3.321173  | 1.212630  | -0.393486 | C | -2.616951 | 0.013765  | -0.459483 |
| C | 2.616930  | -0.013873 | -0.459490 | C | -3.297051 | 1.243391  | -0.307241 |
| C | 3.296862  | -1.243581 | -0.307069 | C | -4.686306 | 1.225688  | -0.117064 |
| C | 4.686102  | -1.226052 | -0.116780 | C | -5.388975 | 0.024543  | -0.061821 |
| C | 5.388929  | -0.024992 | -0.061624 | C | -4.706991 | -1.184397 | -0.195452 |
| C | 4.707120  | 1.184022  | -0.195478 | C | -3.321030 | -1.212837 | -0.393362 |
| N | 1.217780  | 0.019331  | -0.717623 | C | -2.566403 | 2.575740  | -0.384256 |
| C | 0.703982  | -0.293453 | -2.042201 | C | -2.898020 | 3.304616  | -1.697521 |
| C | -0.704015 | 0.293574  | -2.042193 | C | -2.605616 | -2.540152 | -0.589869 |
| N | -1.217786 | -0.019323 | -0.717613 | C | -3.011697 | -3.593147 | 0.446394  |
| P | -0.000008 | 0.000149  | 0.555278  | P | -0.207666 | -1.564145 | 2.000246  |
| P | 0.207684  | 1.564761  | 1.999917  | C | -2.812447 | -3.053575 | -2.024774 |
| C | -0.000005 | 0.000479  | 3.089730  | C | -2.851059 | 3.463937  | 0.833075  |
| O | 0.000064  | 0.000591  | 4.306064  | C | 2.897575  | -3.304711 | -1.697376 |
| C | 2.566064  | -2.575857 | -0.384069 | C | 2.812867  | 3.053208  | -2.025156 |
| C | 2.850699  | -3.464174 | 0.833184  | H | -0.658627 | 1.384426  | -2.241923 |
| C | 2.605945  | 2.540013  | -0.590178 | H | -1.340412 | -0.169272 | -2.813907 |
| C | 3.012188  | 3.593100  | 0.445933  | H | 1.340387  | 0.169383  | -2.813917 |



|   |           |           |           |   |           |           |           |
|---|-----------|-----------|-----------|---|-----------|-----------|-----------|
| H | 0.658516  | -1.384294 | -2.242002 | H | -2.535180 | 2.949068  | 1.751806  |
| H | -5.260901 | -2.123933 | -0.145966 | H | -2.315824 | 4.237919  | -1.781839 |
| H | -6.471447 | 0.029154  | 0.091660  | H | -2.670481 | 2.677926  | -2.574769 |
| H | -5.222767 | 2.170220  | -0.004024 | H | -3.968549 | 3.569177  | -1.746296 |
| H | 5.261151  | 2.123489  | -0.146056 | H | 2.257266  | 3.992581  | -2.188666 |
| H | 6.471384  | -0.029726 | 0.091974  | H | 3.880199  | 3.249771  | -2.228350 |
| H | 5.222423  | -2.170643 | -0.003579 | H | 2.462971  | 2.317103  | -2.766705 |
| H | -1.489988 | 2.360593  | -0.368383 | H | 2.403121  | 4.503153  | 0.316207  |
| H | -1.534477 | -2.347046 | -0.452718 | H | 2.832054  | 3.208291  | 1.460306  |
| H | 1.534781  | 2.347056  | -0.452992 | H | 4.071707  | 3.887384  | 0.350064  |
| H | -2.402535 | -4.503148 | 0.316741  | H | 1.489670  | -2.360600 | -0.368135 |
| H | -2.831550 | -3.208210 | 1.460718  | H | 2.274193  | -4.401473 | 0.759987  |
| H | -4.071190 | -3.887564 | 0.350630  | H | 3.918841  | -3.731390 | 0.907754  |
| H | -2.256690 | -3.992877 | -2.188156 | H | 2.535041  | -2.949338 | 1.752003  |
| H | -3.879745 | -3.250346 | -2.227952 | H | 2.315338  | -4.237991 | -1.781699 |
| H | -2.462664 | -2.317510 | -2.766417 | H | 2.670043  | -2.677994 | -2.574604 |
| H | -2.274741 | 4.401354  | 0.759883  | H | 3.968090  | -3.569313 | -1.746183 |
| H | -3.919244 | 3.730930  | 0.907802  |   |           |           |           |

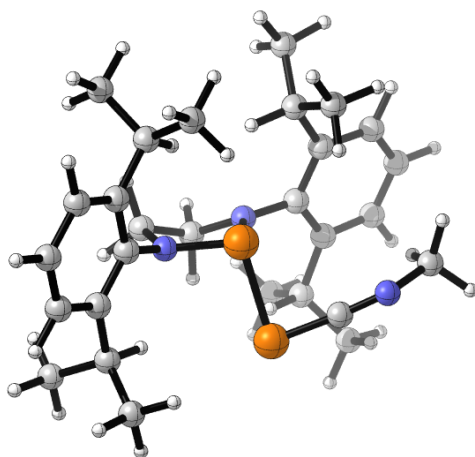

|                                            |                             |
|--------------------------------------------|-----------------------------|
| Zero-point correction=                     | 0.635917 (Hartree/Particle) |
| Thermal correction to Energy=              | 0.672504                    |
| Thermal correction to Enthalpy=            | 0.673448                    |
| Thermal correction to Gibbs Free Energy=   | 0.568569                    |
| Sum of electronic and zero-point Energies= | -1938.250564                |
| Sum of electronic and thermal Energies=    | -1938.213977                |
| Sum of electronic and thermal Enthalpies=  | -1938.213033                |

Sum of electronic and thermal Free Energies=

-1938.317911

|   |           |           |           |   |           |           |           |
|---|-----------|-----------|-----------|---|-----------|-----------|-----------|
| C | -3.279966 | 1.412890  | -0.007236 | H | -6.533255 | 0.767804  | 0.827218  |
| C | -2.845154 | 0.079242  | -0.187727 | H | -4.964127 | 2.659034  | 0.512381  |
| C | -3.733966 | -1.005935 | -0.014212 | H | 4.470537  | 2.849486  | 0.037772  |
| C | -5.059607 | -0.735435 | 0.348742  | H | 6.139629  | 1.045017  | -0.301217 |
| C | -5.497483 | 0.573743  | 0.539757  | H | 5.376333  | -1.255963 | -0.815379 |
| C | -4.612623 | 1.636085  | 0.362811  | H | -1.379070 | 2.211568  | -0.548175 |
| N | -1.494023 | -0.200849 | -0.567161 | H | -2.202443 | -2.407504 | -0.435363 |
| P | -0.167898 | 0.023244  | 0.536422  | H | 0.791027  | 2.385237  | -0.435566 |
| P | 0.088471  | -2.130227 | 1.428343  | H | -3.091689 | -4.317806 | 0.861597  |
| C | 1.256313  | -1.432914 | 2.417449  | H | -2.971684 | -2.870190 | 1.891094  |
| C | -3.281424 | -2.441410 | -0.230140 | H | -4.559857 | -3.399578 | 1.274430  |
| C | -3.974667 | -3.060286 | -1.454513 | H | -3.592688 | -4.076687 | -1.644680 |
| C | -2.345756 | 2.599314  | -0.199365 | H | -5.064563 | -3.133999 | -1.302999 |
| C | -2.091468 | 3.329229  | 1.127991  | H | -3.805923 | -2.454105 | -2.358905 |
| C | -1.121705 | -0.153616 | -1.983325 | H | -1.394760 | 4.170106  | 0.978918  |
| C | 0.348908  | -0.554096 | -2.023775 | H | -3.027095 | 3.736550  | 1.544845  |
| N | 0.929016  | 0.049858  | -0.820300 | H | -1.652326 | 2.647760  | 1.871813  |
| C | 2.328944  | 0.278230  | -0.656014 | H | -2.135180 | 4.370812  | -1.453409 |
| C | 3.276110  | -0.769322 | -0.792713 | H | -3.034925 | 3.039348  | -2.231485 |
| C | 4.640262  | -0.460584 | -0.687277 | H | -3.815702 | 4.032181  | -0.978714 |
| C | 5.072924  | 0.829668  | -0.393204 | H | 1.336365  | 4.724803  | -0.931674 |
| C | 4.133167  | 1.840309  | -0.205391 | H | 3.077629  | 4.409825  | -0.776446 |
| C | 2.761589  | 1.594328  | -0.345582 | H | 2.157820  | 3.654775  | -2.100295 |
| C | 2.873949  | -2.217484 | -1.042370 | H | 0.990232  | 3.954278  | 1.493546  |
| C | 3.132927  | -2.624377 | -2.502414 | H | 1.431283  | 2.294420  | 1.964886  |
| C | 1.785704  | 2.744943  | -0.144006 | H | 2.706487  | 3.514226  | 1.687539  |
| C | 2.111813  | 3.948840  | -1.039967 | H | 1.801558  | -2.303282 | -0.832797 |
| C | 1.726103  | 3.149501  | 1.337850  | H | 3.175426  | -4.209730 | -0.228916 |
| C | 3.567875  | -3.191337 | -0.078666 | H | 4.657484  | -3.229619 | -0.237066 |
| C | -3.490697 | -3.303287 | 1.022859  | H | 3.379428  | -2.912298 | 0.968275  |
| C | -2.864237 | 3.562982  | -1.277666 | H | 2.786947  | -3.654402 | -2.687831 |
| H | -1.268015 | 0.863422  | -2.397340 | H | 2.617621  | -1.956827 | -3.209448 |
| H | -1.741865 | -0.852553 | -2.568583 | H | 4.210051  | -2.583258 | -2.734968 |
| H | 0.858306  | -0.165590 | -2.917691 | N | 2.023120  | -0.845976 | 3.151396  |
| H | 0.428351  | -1.655816 | -2.028690 | C | 3.401347  | -0.430014 | 2.963654  |
| H | -5.758104 | -1.563135 | 0.486992  | H | 3.485825  | 0.634660  | 3.226641  |

H 4.046129 -0.999316 3.651446

H 3.738328 -0.575399 1.925916

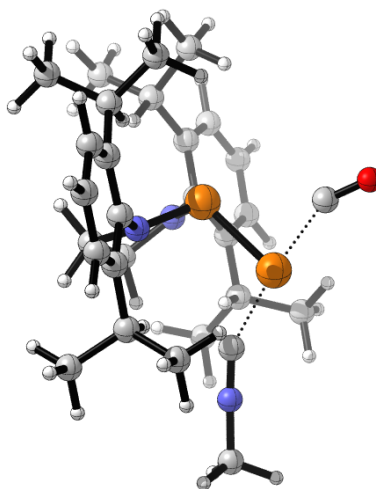

|                                              |                             |
|----------------------------------------------|-----------------------------|
| Imaginary frequency                          | -412 (Int.4)                |
| Zero-point correction=                       | 0.639352 (Hartree/Particle) |
| Thermal correction to Energy=                | 0.680264                    |
| Thermal correction to Enthalpy=              | 0.681208                    |
| Thermal correction to Gibbs Free Energy=     | 0.563638                    |
| Sum of electronic and zero-point Energies=   | -2051.526520                |
| Sum of electronic and thermal Energies=      | -2051.485608                |
| Sum of electronic and thermal Enthalpies=    | 2051.484664                 |
| Sum of electronic and thermal Free Energies= | -2051.602235                |

|                                |                                 |
|--------------------------------|---------------------------------|
| C 2.923062 -1.942474 -0.038967 | C 1.840946 -3.707446 1.428488   |
| C 2.580590 -0.594978 -0.332014 | C 0.698207 -0.232139 -1.932794  |
| C 3.603654 0.385863 -0.437876  | C -0.730131 0.308605 -1.850809  |
| C 4.937170 0.007260 -0.231389  | N -1.251349 -0.180310 -0.571898 |
| C 5.274752 -1.306916 0.082006  | C -2.649781 -0.437695 -0.373690 |
| C 4.271297 -2.267083 0.175198  | C -3.579332 0.631660 -0.277750  |
| N 1.219798 -0.195727 -0.563229 | C -4.941475 0.337862 -0.121761  |
| P -0.032292 -0.283599 0.687335 | C -5.394184 -0.976163 -0.037903 |
| P 0.111952 1.696562 1.825504   | C -4.479360 -2.021532 -0.129372 |
| C 0.054206 0.561751 3.512118   | C -3.109491 -1.781478 -0.311479 |
| O 0.058442 0.451178 4.655031   | C -3.148739 2.091536 -0.354810  |
| C 3.295351 1.837711 -0.783787  | C -3.595054 2.738498 -1.679709  |
| C 3.855987 2.221944 -2.166404  | C -2.174703 -2.978540 -0.450423 |
| C 1.893001 -3.065978 0.030368  | C -2.581162 -3.893538 -1.620358 |

|   |           |           |           |   |           |           |           |
|---|-----------|-----------|-----------|---|-----------|-----------|-----------|
| C | -2.077005 | -3.772609 | 0.864507  | H | 2.801671  | -4.178478 | 1.695445  |
| C | -3.640377 | 2.910490  | 0.850464  | H | 1.605458  | -2.956744 | 2.198307  |
| C | 3.796261  | 2.807669  | 0.300419  | H | 1.346127  | -4.893584 | -1.035686 |
| C | 2.139997  | -4.128333 | -1.057694 | H | 2.153165  | -3.678939 | -2.063678 |
| H | 0.699492  | -1.264161 | -2.340224 | H | 3.103069  | -4.645343 | -0.911660 |
| H | 1.318084  | 0.388963  | -2.603259 | H | -1.835189 | -4.694077 | -1.758144 |
| H | -1.350167 | -0.070320 | -2.678073 | H | -3.555633 | -4.378751 | -1.444692 |
| H | -0.722637 | 1.415907  | -1.906810 | H | -2.654779 | -3.330727 | -2.564760 |
| H | 5.726264  | 0.758600  | -0.311487 | H | -1.387520 | -4.625909 | 0.752672  |
| H | 6.318701  | -1.583522 | 0.248343  | H | -1.705571 | -3.137902 | 1.683610  |
| H | 4.540658  | -3.299512 | 0.409370  | H | -3.059166 | -4.175361 | 1.164385  |
| H | -4.837291 | -3.051912 | -0.070930 | H | -2.052606 | 2.105637  | -0.320545 |
| H | -6.458387 | -1.185179 | 0.095184  | H | -3.226653 | 3.932588  | 0.810929  |
| H | -5.660745 | 1.157112  | -0.054699 | H | -4.738993 | 3.003273  | 0.871010  |
| H | 0.904469  | -2.628003 | -0.160694 | H | -3.312815 | 2.449419  | 1.793385  |
| H | 2.201472  | 1.924171  | -0.821959 | H | -3.230577 | 3.777876  | -1.750030 |
| H | -1.175953 | -2.583643 | -0.679056 | H | -3.212986 | 2.183761  | -2.551486 |
| H | 3.507096  | 3.843932  | 0.053134  | H | -4.694831 | 2.766422  | -1.761437 |
| H | 3.364063  | 2.558889  | 1.281479  | C | 0.182532  | 3.065876  | 0.281620  |
| H | 4.895154  | 2.789009  | 0.392450  | N | 0.244162  | 4.166644  | -0.135768 |
| H | 3.564557  | 3.252533  | -2.432926 | C | 0.294151  | 5.512606  | -0.583863 |
| H | 4.958109  | 2.175545  | -2.183449 | H | 0.095082  | 6.193315  | 0.258598  |
| H | 3.485816  | 1.549464  | -2.957137 | H | 1.290046  | 5.733743  | -0.998164 |
| H | 1.064887  | -4.489073 | 1.467364  | H | -0.463871 | 5.678309  | -1.365267 |

#### Methylisonitrile

|                                              |                             |
|----------------------------------------------|-----------------------------|
| Zero-point correction=                       | 0.044758 (Hartree/Particle) |
| Thermal correction to Energy=                | 0.048617                    |
| Thermal correction to Enthalpy=              | 0.049562                    |
| Thermal correction to Gibbs Free Energy=     | 0.020531                    |
| Sum of electronic and zero-point Energies=   | -132.683859                 |
| Sum of electronic and thermal Energies=      | -132.679999                 |
| Sum of electronic and thermal Enthalpies=    | -132.679055                 |
| Sum of electronic and thermal Free Energies= | -132.708085                 |

|   |           |          |          |   |           |          |           |
|---|-----------|----------|----------|---|-----------|----------|-----------|
| N | 0.004053  | 0.000000 | 0.038991 | C | 0.014375  | 0.000000 | -1.382110 |
| C | -0.004123 | 0.000000 | 1.217382 | H | -1.017344 | 0.000000 | -1.765387 |

H 0.533764 0.895914 -1.754308

H 0.533764 -0.895914 -1.754308

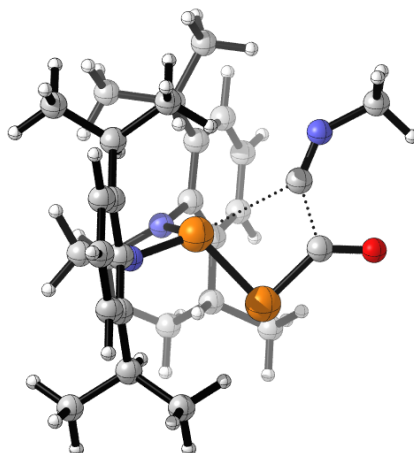

|                                              |                             |
|----------------------------------------------|-----------------------------|
| Imaginary frequency                          | -81 (Int. 51)               |
| Zero-point correction=                       | 0.643844 (Hartree/Particle) |
| Thermal correction to Energy=                | 0.682718                    |
| Thermal correction to Enthalpy=              | 0.683663                    |
| Thermal correction to Gibbs Free Energy=     | 0.571767                    |
| Sum of electronic and zero-point Energies=   | 2051.536186                 |
| Sum of electronic and thermal Energies=      | -2051.497312                |
| Sum of electronic and thermal Enthalpies=    | -2051.496367                |
| Sum of electronic and thermal Free Energies= | -2051.608263                |

|                                 |                                 |
|---------------------------------|---------------------------------|
| C 2.899320 1.088039 -0.920240   | C 3.220280 -3.467860 0.653214   |
| C 2.390507 -0.235944 -0.906100  | C 1.959935 2.276717 -1.080340   |
| C 3.245054 -1.343583 -0.725680  | C 2.493246 3.574702 -0.465819   |
| C 4.626547 -1.113863 -0.642147  | C -2.763193 0.037419 -0.438230  |
| C 5.142864 0.177366 -0.685996   | C -3.046927 1.422618 -0.465001  |
| C 4.281500 1.269652 -0.805885   | C -4.337668 1.842869 -0.119312  |
| N 0.981036 -0.415571 -1.054323  | C -5.322281 0.921807 0.236108   |
| C 0.354778 -1.082839 -2.195388  | C -5.027920 -0.440033 0.256632  |
| C -1.084462 -0.563956 -2.197001 | C -3.748493 -0.905863 -0.073950 |
| N -1.459291 -0.446238 -0.784132 | C -1.994553 2.457200 -0.841860  |
| P -0.104996 -0.192107 0.267994  | C -2.431679 3.301696 -2.048087  |
| C 0.869671 0.966141 2.430295    | C -3.444839 -2.395230 -0.050923 |
| N 1.254863 2.029942 2.807571    | C -3.748569 -3.020911 1.317326  |
| C 1.759502 2.662981 4.002462    | P -0.069315 -1.721845 1.830980  |
| C 2.706499 -2.761570 -0.609537  | C 0.668472 -0.537133 2.962365   |

|   |           |           |           |   |           |           |           |
|---|-----------|-----------|-----------|---|-----------|-----------|-----------|
| O | 1.100889  | -0.608331 | 4.103367  | H | -3.948234 | -2.695216 | -2.164413 |
| C | -4.192081 | -3.124325 | -1.179190 | H | -0.829753 | 4.054255  | 0.080190  |
| C | -1.625130 | 3.343197  | 0.357639  | H | -2.493358 | 3.925233  | 0.707387  |
| C | 3.021195  | -3.579128 | -1.872587 | H | -1.257931 | 2.734180  | 1.196577  |
| C | 1.592846  | 2.484047  | -2.558607 | H | -1.626822 | 3.994075  | -2.343878 |
| H | -1.149421 | 0.411095  | -2.716966 | H | -2.672809 | 2.664785  | -2.913703 |
| H | -1.764343 | -1.267439 | -2.704036 | H | -3.323755 | 3.906901  | -1.818738 |
| H | 0.885264  | -0.818495 | -3.122161 | H | 0.862722  | 3.302753  | -2.669255 |
| H | 0.361062  | -2.184421 | -2.094853 | H | 2.487044  | 2.739767  | -3.150836 |
| H | -5.802932 | -1.155114 | 0.539267  | H | 1.150466  | 1.574748  | -2.990268 |
| H | -6.323637 | 1.268612  | 0.500923  | H | 1.713394  | 4.351802  | -0.504315 |
| H | -4.576128 | 2.908433  | -0.127380 | H | 2.775209  | 3.429082  | 0.588100  |
| H | 4.696136  | 2.277721  | -0.818235 | H | 3.368644  | 3.966849  | -1.008806 |
| H | 6.220674  | 0.338470  | -0.612271 | H | 1.615895  | -2.690874 | -0.504184 |
| H | 5.303639  | -1.961425 | -0.521170 | H | 2.750338  | -4.459792 | 0.749321  |
| H | -1.083346 | 1.921735  | -1.136904 | H | 4.311830  | -3.617580 | 0.625521  |
| H | -2.366522 | -2.500975 | -0.233650 | H | 2.970234  | -2.887317 | 1.553415  |
| H | 1.035381  | 2.031994  | -0.538950 | H | 2.587326  | -4.589994 | -1.801875 |
| H | -3.454934 | -4.083079 | 1.325025  | H | 2.620422  | -3.095291 | -2.777275 |
| H | -3.189091 | -2.508308 | 2.113995  | H | 4.109925  | -3.688203 | -2.010269 |
| H | -4.823213 | -2.970471 | 1.559281  | H | 2.731106  | 3.126954  | 3.779749  |
| H | -3.925323 | -4.193802 | -1.194435 | H | 1.062210  | 3.455972  | 4.309807  |
| H | -5.284705 | -3.051958 | -1.047071 | H | 1.862101  | 1.908071  | 4.797025  |

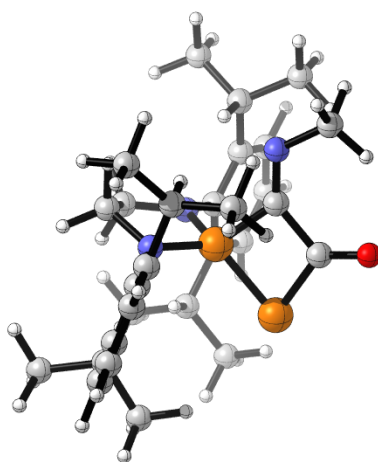

Zero-point correction= 0.647139 (Hartree/Particle)  
Thermal correction to Energy= 0.684738  
Thermal correction to Enthalpy= 0.685682

|                                              |              |
|----------------------------------------------|--------------|
| Thermal correction to Gibbs Free Energy=     | 0.577967     |
| Sum of electronic and zero-point Energies=   | -2051.585825 |
| Sum of electronic and thermal Energies=      | -2051.548226 |
| Sum of electronic and thermal Enthalpies=    | -2051.547281 |
| Sum of electronic and thermal Free Energies= | -2051.654996 |

|   |           |           |           |   |           |           |           |
|---|-----------|-----------|-----------|---|-----------|-----------|-----------|
| C | -3.523188 | -0.637271 | -0.587528 | C | 3.245340  | -3.093383 | 0.505820  |
| C | -2.585523 | 0.401323  | -0.397234 | C | -2.197118 | 3.904493  | -0.697962 |
| C | -2.969858 | 1.652976  | 0.137534  | C | -3.639878 | -2.107521 | -2.624580 |
| C | -4.317519 | 1.846835  | 0.465434  | H | 0.741087  | -0.826773 | -2.662923 |
| C | -5.256185 | 0.833746  | 0.278253  | H | 1.343214  | 0.853127  | -2.772380 |
| C | -4.859498 | -0.396441 | -0.241115 | H | -1.350036 | 0.316553  | -2.883272 |
| N | -1.223008 | 0.172213  | -0.782581 | H | -0.739222 | 1.791353  | -2.082004 |
| C | -0.719415 | 0.687187  | -2.061417 | H | 4.752541  | 2.853262  | 0.261552  |
| C | 0.717783  | 0.168430  | -2.182576 | H | 6.341359  | 0.952455  | 0.324068  |
| N | 1.227138  | 0.099788  | -0.809724 | H | 5.548726  | -1.351775 | -0.123982 |
| P | 0.011665  | -0.218115 | 0.327803  | H | -5.599944 | -1.185825 | -0.381190 |
| C | -0.106129 | -1.924373 | 1.005032  | H | -6.302197 | 1.003812  | 0.542489  |
| N | -0.239174 | -3.014743 | 0.371828  | H | -4.635934 | 2.805639  | 0.878089  |
| C | -0.282793 | -4.278318 | 1.103548  | H | 1.949910  | -2.170085 | -0.919259 |
| C | -1.978981 | 2.790834  | 0.340458  | H | 1.077973  | 2.421999  | -0.459548 |
| C | -2.023616 | 3.357368  | 1.766575  | H | -2.026046 | -2.015874 | -1.211444 |
| C | -3.121837 | -1.977782 | -1.182890 | H | 1.293230  | 4.385841  | 1.013031  |
| C | -3.591529 | -3.156098 | -0.318984 | H | 1.765586  | 2.900070  | 1.881494  |
| C | 2.604884  | 0.317747  | -0.492385 | H | 3.013532  | 4.032600  | 1.298199  |
| C | 3.495212  | -0.774811 | -0.454844 | H | 1.684752  | 4.582176  | -1.506454 |
| C | 4.841376  | -0.521114 | -0.158783 | H | 3.417783  | 4.215017  | -1.320193 |
| C | 5.288707  | 0.774014  | 0.093982  | H | 2.417465  | 3.227127  | -2.408135 |
| C | 4.393725  | 1.842692  | 0.057266  | H | 2.856287  | -4.106082 | 0.314937  |
| C | 3.039847  | 1.637642  | -0.233703 | H | 4.315325  | -3.186611 | 0.753838  |
| C | 3.029625  | -2.197407 | -0.723262 | H | 2.729438  | -2.690408 | 1.390367  |
| C | 3.711487  | -2.782936 | -1.969510 | H | 3.322029  | -3.791578 | -2.182808 |
| C | 2.084831  | 2.820804  | -0.278618 | H | 3.532927  | -2.151696 | -2.854639 |
| C | 2.039688  | 3.575959  | 1.057482  | H | 4.802360  | -2.866588 | -1.833310 |
| P | 0.193058  | 0.367012  | 2.364536  | H | -3.307038 | -3.058265 | -3.072143 |
| C | 0.052259  | -1.507628 | 2.474322  | H | -4.742095 | -2.084704 | -2.657331 |
| O | 0.092280  | -2.244236 | 3.440618  | H | -3.273170 | -1.283981 | -3.258154 |
| C | 2.420099  | 3.763140  | -1.445447 | H | -3.199794 | -4.102281 | -0.725058 |

|   |           |           |           |   |           |           |           |
|---|-----------|-----------|-----------|---|-----------|-----------|-----------|
| H | -3.234185 | -3.053619 | 0.716670  | H | -1.424657 | 4.684631  | -0.597275 |
| H | -4.690660 | -3.236768 | -0.292386 | H | -2.160732 | 3.513913  | -1.726906 |
| H | -0.968085 | 2.388587  | 0.187041  | H | -3.180644 | 4.383212  | -0.560681 |
| H | -1.224305 | 4.103249  | 1.903046  | H | -1.245235 | -4.767507 | 0.879858  |
| H | -2.983290 | 3.857253  | 1.975035  | H | 0.503509  | -4.934597 | 0.695474  |
| H | -1.877481 | 2.561186  | 2.510438  | H | -0.158842 | -4.169067 | 2.189978  |

## 5. References

- 
- 1 (a) L. Liu; D. A. Ruiz, D. Munz and G. Bertrand, *Chem*, 2016, **1**, 147-153; (b) M. M. Hansmann, R. Jazzar and G. Bertrand, *J. Am. Chem. Soc.*, 2016, **138**, 8356-8359
- 2 M. Ibarra-Rodriguez, H. V. R. Dias, V. M. Jimenez-Perez, B. M. Munoz-Flores, A. Flores-Parra, S. Sanchez, *Z. Anorg. Allgem. Chem.*, 2012, **638**, 1486-1490.
- 3 Gaussian 09, Revision D.01, Frisch, M. J.; Trucks, G. W.; Schlegel, H. B.; Scuseria, G. E.; Robb, M. A.; Cheeseman, J. R.; Scalmani, G.; Barone, V.; Mennucci, B.; Petersson, G. A.; Nakatsuji, H.; Caricato, M.; Li, X.; Hratchian, H. P.; Izmaylov, A. F.; Bloino, J.; Zheng, G.; Sonnenberg, J. L.; Hada, M.; Ehara, M.; Toyota, K.; Fukuda, R.; Hasegawa, J.; Ishida, M.; Nakajima, T.; Honda, Y.; Kitao, O.; Nakai, H.; Vreven, T.; Montgomery, J. A. Jr.; Peralta, J. E.; Ogliaro, F.; Bearpark, M.; Heyd, J. J.; Brothers, E.; Kudin, K. N.; Staroverov, V. N.; Keith, T.; Kobayashi, R.; Normand, J.; Raghavachari, K.; Rendell, A.; Burant, J. C.; Iyengar, S. S.; Tomasi, J.; Cossi, M.; Rega, N.; Millam, J. M.; Klene, M.; Knox, J. E.; Cross, J. B.; Bakken, V.; Adamo, C.; Jaramillo, J.; Gomperts, R.; Stratmann, R. E.; Yazyev, O.; Austin, A. J.; Cammi, R.; Pomelli, C.; Ochterski, J. W.; Martin, R. L.; Morokuma, K.; Zakrzewski, V. G.; Voth, G. A.; Salvador, P.; Dannenberg, J. J.; Dapprich, S.; Daniels, A. D.; Farkas, O.; Foresman, J. B.; Ortiz, J. V.; Cioslowski, J.; Fox, D. J. Gaussian, Inc., Wallingford CT, **2013**.
- 4 (a) C. Lee, W. Yang, R. G. Parr, *Phys. Rev. B* 1988, **37**, 785-789. (b) P. J. Stephens, F. J. Devlin, C. F. Chabalowski, M. J. Frisch, *J. Phys. Chem.* 1994, **98**, 11623-11627.
- 5 Y. Zhao and D. Truhlar, *Theor. Chem. Acc.*, 2008, **120**, 215-241.
- 6 (a) R. Ditchfield, W. J. Hehre, J. A. Pople, *J. Chem. Phys.* 1971, **54**, 724-728. (b) W. J. Hehre, R. Ditchfield, J. A. Pople, *J. Chem. Phys.* 1972, **56**, 2257-2261. (c) P. C. Hariharan, J. A. Pople, *Theor. Chim. Acta* 1973, **28**, 213-222. (d) J. D. Dill, J. A. Pople, *J. Chem. Phys.* 1975, **62**,



---

2921–2923. (e) M. M. Francl, W. J. Pietro, W. J. Hehre, J. S. Binkley, M. S. Gordon, D. J. DeFrees, J. A. Pople, *J. Chem. Phys.* 1982, **77**, 3654–3665.

7 (a) S. Grimme, S. Ehrlich, L. Goerigk, *J. Comp. Chem.*, 2011, **32**, 1456; (b) S. Grimme, J. Antony, S. Ehrlich, H. Krieg, *J. Chem. Phys.*, 2010, **132**, 154104.

<sup>8</sup> (a) C. Peng and H. B. Schlegel, *Israel J. of Chem.*, 1993, **33**, 449; b) C. Peng, P. Y. Ayala, H. B. Schlegel and M. J. Frisch, *J. Comp. Chem.* 1996, **17**, 49.

<sup>9</sup> (a) K. Fukui, *Acc. Chem. Soc.* 1981, **12**, 363; (b) C. Gonzalez and H. B. Schlegel, *J. Chem. Phys.* 1989, **90**, 2154; (c) C. Gonzalez and H. B. Schlegel, *J. Phys. Chem.* 1990, **94**, 5523.

10 C. Y. Legault, CYLview, 1.0b; Université de Sherbrooke: Sherbrooke, Québec, Canada, 2009; [www.cylview.org](http://www.cylview.org).
